# Supplementary material for: Impact of seasonal flooding and hydrological connectivity loss on microbial community dynamics in mangrove sediments of the southern Gulf of Mexico
Source: PeerJ. 2025 May 5;13:e19371. doi: 10.7717/peerj.19371 (PMC12060900; doi:10.7717/peerj.19371)
Supplement: Supplemental Information 2 [file peerj-13-19371-s002.xlsx]

## Sheet: Supplementary table 1
		Supplementary Table 1: Metadata Information for Each Sample. This table provides comprehensive metadata for each sample collected during the study, including details such as the zone, depth, and season of collection. Each entry is designed to facilitate a deeper understanding of the environmental context and sampling conditions, which may influence the microbial community analyses presented in th…
		lat	long	coll_date	ID	seqR2	zone	month	season	depth	Sample_ID
	1	18.6515ˇ	-91.7587	17/01/2018	P1	zr2502_1_R2	Fringe	Jan	flood	5	zr2502_1_R1
	2	18.6514	-91.758	30/05/2018	P10	zr2502_10_R2	Basin	May	dry	5	zr2502_10_R1
	3	18.6515ˇ	-91.7587	17/01/2018	P11	zr2502_11_R2	Fringe	Jan	dry	20	zr2502_11_R1
	4	18.6515ˇ	-91.7587	17/01/2018	P12	zr2502_12_R2	Fringe	Jan	flood	40	zr2502_12_R1
	5	18.6515ˇ	-91.7587	17/01/2018	P13	zr2502_13_R2	Fringe	Jan	flood	40	zr2502_13_R1
	6	18.6515ˇ	-91.7587	17/01/2018	P14	zr2502_14_R2	Fringe	Jan	flood	5	zr2502_14_R1
	7	18.6515ˇ	-91.7587	17/01/2018	P15	zr2502_15_R2	Fringe	Jan	flood	20	zr2502_15_R1
	8	18.6514	-91.758	17/01/2018	P17	zr2502_17_R2	Basin	Jan	flood	20	zr2502_17_R1
	9	18.6514	-91.758	17/01/2018	P18	zr2502_18_R2	Basin	Jan	flood	40	zr2502_18_R1
	10	18.6514	-91.758	17/01/2018	P19	zr2502_19_R2	Basin	Jan	flood	20	zr2502_19_R1
	11	18.6515ˇ	-91.7587	17/01/2018	P2	zr2502_2_R2	Fringe	Jan	flood	5	zr2502_2_R1
	12	18.6514	-91.758	17/01/2018	P20	zr2502_20_R2	Basin	Jan	flood	40	zr2502_20_R1
	13	18.6514	-91.758	17/01/2018	P21	zr2502_21_R2	Basin	Jan	flood	5	zr2502_21_R1
	14	18.6514	-91.758	17/01/2018	P22	zr2502_22_R2	Basin	Jan	flood	20	zr2502_22_R1
	15	18.6514	-91.758	17/01/2018	P23	zr2502_23_R2	Basin	Jan	flood	40	zr2502_23_R1
	16	18.651	-91.758	17/01/2018	P24	zr2502_24_R2	Impaired	Jan	flood	5	zr2502_24_R1
	17	18.651	-91.758	17/01/2018	P25	zr2502_25_R2	Impaired	Jan	flood	20	zr2502_25_R1
	18	18.651	-91.758	17/01/2018	P26	zr2502_26_R2	Impaired	Jan	flood	40	zr2502_26_R1
	19	18.651	-91.758	17/01/2018	P27	zr2502_27_R2	Impaired	Jan	flood	5	zr2502_27_R1
	20	18.651	-91.758	17/01/2018	P28	zr2502_28_R2	Impaired	Jan	flood	20	zr2502_28_R1
	21	18.651	-91.758	17/01/2018	P29	zr2502_29_R2	Impaired	Jan	flood	40	zr2502_29_R1
	22	18.6515ˇ	-91.7587	17/01/2018	P3	zr2502_3_R2	Fringe	Jan	flood	20	zr2502_3_R1
	23	18.651	-91.758	17/01/2018	P30	zr2502_30_R2	Impaired	Jan	flood	5	zr2502_30_R1
	24	18.651	-91.758	17/01/2018	P31	zr2502_31_R2	Impaired	Jan	flood	20	zr2502_31_R1
	25	18.651	-91.758	17/01/2018	P32	zr2502_32_R2	Impaired	Jan	flood	40	zr2502_32_R1
	26	18.6515ˇ	-91.7587	30/05/2018	P33	zr2502_33_R2	Fringe	May	flood	20	zr2502_33_R1
	27	18.6515ˇ	-91.7587	30/05/2018	P34	zr2502_34_R2	Fringe	May	dry	40	zr2502_34_R1
	28	18.6515ˇ	-91.7587	30/05/2018	P35	zr2502_35_R2	Fringe	May	dry	20	zr2502_35_R1
	29	18.6515ˇ	-91.7587	30/05/2018	P36	zr2502_36_R2	Fringe	May	dry	40	zr2502_36_R1
	30	18.6515ˇ	-91.7587	30/05/2018	P37	zr2502_37_R2	Fringe	May	dry	5	zr2502_37_R1
	31	18.6515ˇ	-91.7587	30/05/2018	P38	zr2502_38_R2	Fringe	May	dry	20	zr2502_38_R1
	32	18.6515ˇ	-91.7587	30/05/2018	P39	zr2502_39_R2	Fringe	May	dry	40	zr2502_39_R1
	33	18.6514	-91.758	17/01/2018	P4	zr2502_4_R2	Basin	Jan	flood	5	zr2502_4_R1
	34	18.6514	-91.758	30/05/2018	P40	zr2502_40_R2	Basin	May	dry	40	zr2502_40_R1
	35	18.6514	-91.758	30/05/2018	P41	zr2502_41_R2	Basin	May	dry	20	zr2502_41_R1
	36	18.6514	-91.758	30/05/2018	P42	zr2502_42_R2	Basin	May	dry	40	zr2502_42_R1
	37	18.6514	-91.758	30/05/2018	P43	zr2502_43_R2	Basin	May	dry	5	zr2502_43_R1
	38	18.6514	-91.758	30/05/2018	P44	zr2502_44_R2	Basin	May	dry	20	zr2502_44_R1
	39	18.6514	-91.758	30/05/2018	P45	zr2502_45_R2	Basin	May	dry	40	zr2502_45_R1
	40	18.651	-91.758	30/05/2018	P46	zr2502_46_R2	Impaired	May	dry	5	zr2502_46_R1
	41	18.651	-91.758	30/05/2018	P47	zr2502_47_R2	Impaired	May	dry	20	zr2502_47_R1
	42	18.651	-91.758	30/05/2018	P48	zr2502_48_R2	Impaired	May	dry	40	zr2502_48_R1
	43	18.651	-91.758	30/05/2018	P49	zr2502_49_R2	Impaired	May	dry	5	zr2502_49_R1
	44	18.6514	-91.758	17/01/2018	P5	zr2502_5_R2	Basin	Jan	flood	5	zr2502_5_R1
	45	18.651	-91.758	30/05/2018	P50	zr2502_50_R2	Impaired	May	dry	20	zr2502_50_R1
	46	18.651	-91.758	30/05/2018	P51	zr2502_51_R2	Impaired	May	dry	40	zr2502_51_R1
	47	18.651	-91.758	30/05/2018	P52	zr2502_52_R2	Impaired	May	dry	5	zr2502_52_R1
	48	18.651	-91.758	30/05/2018	P53	zr2502_53_R2	Impaired	May	dry	20	zr2502_53_R1
	49	18.651	-91.758	30/05/2018	P54	zr2502_54_R2	Impaired	May	dry	40	zr2502_54_R1
	50	18.6515ˇ	-91.7587	30/05/2018	P6	zr2502_6_R2	Fringe	May	flood	5	zr2502_6_R1
	51	18.6515ˇ	-91.7587	30/05/2018	P7	zr2502_7_R2	Fringe	May	dry	5	zr2502_7_R1
	52	18.6514	-91.758	30/05/2018	P8	zr2502_8_R2	Basin	May	dry	5	zr2502_8_R1
	53	18.6514	-91.758	30/05/2018	P9	zr2502_9_R2	Basin	May	dry	20	zr2502_9_R1

## Sheet: Supplementary table 2
	Supplementary Table 2: Read and ASV Counts Per Sample. This table enumerates the total number of sequencing reads and the count of Amplicon Sequence Variants (ASVs) identified for each sample. The read counts reflect the sequencing depth, while the ASV counts provide insight into the microbial diversity observed in each sample. These metrics are essential for assessing the quality and comprehensi…
		Sample	Read_Counts	ASV_Counts
	1	zr2502_1_R1	4720	189
	2	zr2502_10_R1	13346	163
	3	zr2502_11_R1	4338	162
	4	zr2502_12_R1	6796	190
	5	zr2502_13_R1	5575	154
	6	zr2502_14_R1	8057	242
	7	zr2502_15_R1	12159	363
	8	zr2502_17_R1	6887	210
	9	zr2502_18_R1	12667	330
	10	zr2502_19_R1	8513	264
	11	zr2502_2_R1	13088	371
	12	zr2502_20_R1	5149	151
	13	zr2502_21_R1	12066	133
	14	zr2502_22_R1	12451	56
	15	zr2502_23_R1	11516	136
	16	zr2502_24_R1	11221	347
	17	zr2502_25_R1	8562	273
	18	zr2502_26_R1	17010	393
	19	zr2502_27_R1	8319	159
	20	zr2502_28_R1	7402	244
	21	zr2502_29_R1	7951	238
	22	zr2502_3_R1	7759	275
	23	zr2502_30_R1	12371	359
	24	zr2502_31_R1	9885	337
	25	zr2502_32_R1	11838	358
	26	zr2502_33_R1	9399	141
	27	zr2502_34_R1	15387	242
	28	zr2502_35_R1	10010	162
	29	zr2502_36_R1	6390	89
	30	zr2502_37_R1	10375	102
	31	zr2502_38_R1	19872	245
	32	zr2502_39_R1	13984	166
	33	zr2502_4_R1	11388	324
	34	zr2502_40_R1	15513	308
	35	zr2502_41_R1	10151	85
	36	zr2502_42_R1	19588	158
	37	zr2502_43_R1	12843	130
	38	zr2502_44_R1	9160	79
	39	zr2502_45_R1	11751	151
	40	zr2502_46_R1	11578	283
	41	zr2502_47_R1	9891	311
	42	zr2502_48_R1	16855	389
	43	zr2502_49_R1	7615	249
	44	zr2502_5_R1	9226	327
	45	zr2502_50_R1	11394	338
	46	zr2502_51_R1	7175	190
	47	zr2502_52_R1	5431	156
	48	zr2502_53_R1	8752	259
	49	zr2502_54_R1	11197	277
	50	zr2502_6_R1	11118	260
	51	zr2502_7_R1	13429	238
	52	zr2502_8_R1	20823	494
	53	zr2502_9_R1	7449	218

## Sheet: Supplementary table 3
		Supplementary Table 3: Taxonomy of Amplicon Sequence Variants (ASVs). This table details the taxonomic classification of each Amplicon Sequence Variant (ASV) identified in the study. It includes taxonomic ranks from kingdom to species (where available), providing a comprehensive view of the microbial diversity captured through sequencing
		Kingdom	Phylum	Class	Order	Family	Genus	Species	Taxonomy_ID
	1	d__Bacteria	p__Firmicutes_D	c__Bacilli	o__Lactobacillales	f__Streptococcaceae	g__Lactococcus_A_343306	s__carnosus	ASV1
	2	d__Bacteria	p__Proteobacteria	c__Gammaproteobacteria	o__Enterobacterales_A_737866	f__Vibrionaceae	g__Vibrio_678715	s__Vibrio rumoiensis	ASV2
	3	d__Bacteria	p__Proteobacteria	c__Gammaproteobacteria	o__Enterobacterales_A_737866	f__Vibrionaceae	g__Vibrio_678715	s__Vibrio rumoiensis	ASV3
	4	d__Bacteria	p__Proteobacteria	c__Gammaproteobacteria	o__Pseudomonadales_641030	f__Halomonadaceae_641030	g__Halomonas_E_640244	NA	ASV4
	5	d__Bacteria	p__Proteobacteria	c__Gammaproteobacteria	o__Enterobacterales_A_737866	f__Vibrionaceae	g__Vibrio_678715	s__Vibrio rumoiensis	ASV5
	6	d__Bacteria	p__Firmicutes_D	c__Bacilli	o__Bacillales_G_286742	NA	NA	NA	ASV6
	7	d__Bacteria	p__Firmicutes_D	c__Bacilli	o__Exiguobacterales	f__Exiguobacteraceae	g__Exiguobacterium_A	NA	ASV7
	8	d__Bacteria	p__Firmicutes_D	c__Bacilli	o__Bacillales_A	f__Planococcaceae	g__Planococcus	s__maritimus	ASV8
	9	d__Bacteria	p__Proteobacteria	c__Gammaproteobacteria	o__Enterobacterales_A_737866	f__Vibrionaceae	g__Vibrio_678715	NA	ASV9
	10	d__Bacteria	p__Firmicutes_D	c__Bacilli	o__Exiguobacterales	f__Exiguobacteraceae	g__Exiguobacterium_A	s__aurantiacum_A_361684	ASV10
	11	d__Bacteria	p__Proteobacteria	c__Gammaproteobacteria	o__HK1	f__HK1	g__HK1	s__sp000583135	ASV11
	12	d__Bacteria	p__Nitrospirota_A_437815	c__Thermodesulfovibrionia	o__Thermodesulfovibrionales	NA	NA	NA	ASV12
	13	d__Bacteria	p__Actinobacteriota	c__Acidimicrobiia_402965	o__UBA5794	f__UBA5794	g__SZUA-442	s__sp003235475	ASV13
	14	d__Bacteria	p__Proteobacteria	c__Gammaproteobacteria	o__Pseudomonadales_641035	f__Marinomonadaceae	g__Marinomonas	s__piezotolerans	ASV14
	15	d__Bacteria	p__Proteobacteria	c__Gammaproteobacteria	o__Enterobacterales_A_737866	f__Alteromonadaceae_665222	g__Idiomarina	s__fontislapidosi	ASV15
	16	d__Bacteria	p__Proteobacteria	c__Gammaproteobacteria	o__Enterobacterales_A_737866	f__Vibrionaceae	g__Vibrio_678715	s__Vibrio rumoiensis	ASV16
	17	d__Bacteria	p__Proteobacteria	c__Gammaproteobacteria	o__Enterobacterales_A_737866	f__Vibrionaceae	g__Vibrio_678715	s__Vibrio rumoiensis	ASV17
	18	d__Bacteria	p__Proteobacteria	c__Gammaproteobacteria	o__HK1	f__HK1	g__HK1	s__sp000583135	ASV18
	19	d__Bacteria	p__Desulfobacterota_I	c__Desulfobacteria	o__Desulfobacterales	f__SG8-13	g__SG8-13	s__sp001303025	ASV19
	20	d__Bacteria	p__Proteobacteria	c__Gammaproteobacteria	o__Pseudomonadales_641030	f__Halomonadaceae_641030	g__Halomonas_C_640989	NA	ASV20
	21	d__Bacteria	p__Firmicutes_D	c__Bacilli	o__Bacillales_B_302584	f__Bacillaceae_B_301660	g__Bacillus_BM	s__salacetis	ASV21
	22	d__Bacteria	p__Nitrospirota_A_437815	c__Thermodesulfovibrionia	o__Thermodesulfovibrionales	NA	NA	NA	ASV22
	23	d__Bacteria	p__Firmicutes_D	c__Bacilli	o__Bacillales_A	f__Planococcaceae	g__Planococcus	s__citreus	ASV23
	24	d__Bacteria	p__Proteobacteria	c__Gammaproteobacteria	o__Enterobacterales_A_737866	f__Vibrionaceae	g__Vibrio_678715	s__Vibrio alginolyticus_673799	ASV24
	25	d__Bacteria	p__Proteobacteria	c__Gammaproteobacteria	o__Enterobacterales_A_737866	f__Alteromonadaceae_665222	g__Idiomarina	s__piscisalsi	ASV25
	26	d__Bacteria	p__Firmicutes_D	c__Bacilli	o__Bacillales_D_310495	f__Halobacillaceae	g__Pontibacillus_A	NA	ASV26
	27	d__Bacteria	p__Campylobacterota	c__Campylobacteria	o__Campylobacterales	f__Sulfurovaceae	g__Sulfurovum	s__aggregans	ASV27
	28	d__Bacteria	p__Chloroflexota	c__Ktedonobacteria	o__Ktedonobacterales	f__Ktedonobacteraceae	g__CF-154	s__sp005879655	ASV28
	29	d__Bacteria	p__Proteobacteria	c__Gammaproteobacteria	o__Pseudomonadales_639862	f__Halomonadaceae_639862	g__Larsenimonas	s__salina	ASV29
	30	d__Bacteria	p__Nitrospirota_A_437815	c__Thermodesulfovibrionia	NA	NA	NA	NA	ASV30
	31	d__Bacteria	p__Chloroflexota	c__Anaerolineae	o__Anaerolineales	f__UBA4823	g__UBA6092	s__sp002428565	ASV31
	32	d__Bacteria	p__Chloroflexota	c__Dehalococcoidia	o__GIF9	f__AB-539-J10	g__E44-bin10	s__sp004377135	ASV32
	33	d__Bacteria	p__Chloroflexota	c__Anaerolineae	o__Ardenticatenales	f__Ardenticatenaceae	g__Ardenticatena	NA	ASV33
	34	d__Bacteria	p__Firmicutes_D	c__Bacilli	o__Bacillales_B_302584	f__Bacillaceae_B_301660	g__Rossellomorea	NA	ASV34
	35	d__Bacteria	p__Proteobacteria	c__Gammaproteobacteria	o__Enterobacterales_A_737866	f__Vibrionaceae	g__Vibrio_678715	NA	ASV35
	36	d__Bacteria	p__Chloroflexota	c__Anaerolineae	o__Anaerolineales	f__UBA4823	g__DSWF01	s__sp011368195	ASV36
	37	d__Bacteria	p__Firmicutes_D	c__Bacilli	o__Bacillales_D_310489	f__Bacillaceae_N	g__Bacillus_AV	s__solimangrovi	ASV37
	38	d__Bacteria	p__Proteobacteria	c__Gammaproteobacteria	o__Enterobacterales_A_737866	f__Vibrionaceae	g__Vibrio_678715	s__Vibrio mytili	ASV38
	39	d__Bacteria	p__Proteobacteria	c__Alphaproteobacteria	o__Rhizobiales_A_504721	f__Methyloligellaceae	g__Methyloceanibacter	NA	ASV39
	40	d__Bacteria	p__Proteobacteria	c__Gammaproteobacteria	o__Pseudomonadales_660879	f__Moraxellaceae	g__Psychrobacter	s__alimentarius_A	ASV40
	41	d__Bacteria	p__Proteobacteria	c__Alphaproteobacteria	o__Rhizobiales_A_504705	f__Beijerinckiaceae	NA	NA	ASV41
	42	d__Bacteria	p__Firmicutes_D	c__Bacilli	o__Bacillales_B_302584	f__Bacillaceae_B_301660	g__Rossellomorea	NA	ASV42
	43	d__Bacteria	p__Bacteroidota	c__Bacteroidia	o__Flavobacteriales_877923	f__Flavobacteriaceae	g__Gramella	NA	ASV43
	44	d__Bacteria	p__Proteobacteria	c__Gammaproteobacteria	o__Pseudomonadales_641030	f__Halomonadaceae_641030	g__Salinicola	NA	ASV44
	45	d__Bacteria	p__Gemmatimonadota	c__Gemmatimonadetes	o__KS3-K002	f__JABDQB01	g__JAAXHJ01	s__sp009838765	ASV45
	46	d__Bacteria	p__Bacteroidota	c__Bacteroidia	o__Flavobacteriales_877923	f__Flavobacteriaceae	g__Gramella	NA	ASV46
	47	d__Bacteria	p__Proteobacteria	c__Gammaproteobacteria	o__Pseudomonadales_650611	f__Pseudomonadaceae	g__Pseudomonas_E_647464	s__lundensis	ASV47
	48	d__Bacteria	p__Desulfobacterota_I	c__DSM-4660	o__Desulfatiglandales	f__HGW-15	g__JAAZBV01	NA	ASV48
	49	d__Bacteria	p__Nitrospirota_A_437815	c__Thermodesulfovibrionia	o__Thermodesulfovibrionales	NA	NA	NA	ASV49
	50	d__Bacteria	p__Proteobacteria	c__Gammaproteobacteria	o__Pseudomonadales_641030	f__Halomonadaceae_641030	g__Halomonas_E_640244	NA	ASV50
	51	d__Bacteria	p__Firmicutes_D	c__Bacilli	o__Lactobacillales	f__Streptococcaceae	g__Lactococcus_A_346120	NA	ASV51
	52	d__Bacteria	p__Actinobacteriota	c__Acidimicrobiia_402965	o__UBA5794	f__UBA5794	g__SZUA-442	s__sp003235475	ASV52
	53	d__Bacteria	p__Firmicutes_D	c__Bacilli	o__Bacillales_A	f__Planococcaceae	g__Planococcus	NA	ASV53
	54	d__Bacteria	p__Firmicutes_A	c__Clostridia_258483	o__Tissierellales	f__SIT17	g__Senegalia	s__massiliensis	ASV54
	55	d__Bacteria	p__Proteobacteria	c__Gammaproteobacteria	o__Pseudomonadales_641035	f__Marinomonadaceae	g__Marinomonas	NA	ASV55
	56	d__Bacteria	p__Proteobacteria	c__Gammaproteobacteria	o__Enterobacterales_A_737866	f__Alteromonadaceae_665222	g__Pseudoalteromonas	s__arabiensis	ASV56
	57	d__Bacteria	p__Proteobacteria	c__Gammaproteobacteria	o__Pseudomonadales_641030	f__Halomonadaceae_641030	g__Halomonas_E_640244	NA	ASV57
	58	d__Bacteria	p__Chloroflexota	c__Anaerolineae	o__Anaerolineales	NA	NA	NA	ASV58
	59	d__Bacteria	p__Proteobacteria	c__Gammaproteobacteria	o__VBWC01	f__VBWC01	g__VBWC01	s__sp006218035	ASV59
	60	d__Bacteria	p__Firmicutes_D	c__Bacilli	o__Bacillales_D_310495	f__Halobacillaceae	g__Pontibacillus_A	s__salipaludis	ASV60
	61	d__Bacteria	p__Acidobacteriota	c__Aminicenantia	o__Aminicenantales	f__Aminicenantaceae	NA	NA	ASV61
	62	d__Bacteria	p__Firmicutes_D	c__Bacilli	o__Bacillales_D_310495	f__Halobacillaceae	g__Halobacillus_A_288294	NA	ASV62
	63	d__Bacteria	p__Proteobacteria	c__Gammaproteobacteria	o__Pseudomonadales_641030	f__Halomonadaceae_641030	g__Halomonas_E_640244	NA	ASV63
	64	d__Bacteria	p__Firmicutes_D	c__Bacilli	o__Bacillales_B_306089	f__Bacillaceae_I	g__Sutcliffiella_A	NA	ASV64
	65	d__Bacteria	p__Proteobacteria	c__Gammaproteobacteria	o__Pseudomonadales_641030	f__Halomonadaceae_641030	g__Halomonas_E_640244	NA	ASV65
	66	d__Bacteria	p__Campylobacterota	c__Campylobacteria	o__Campylobacterales	f__Sulfurovaceae	g__Sulfurovum	s__aggregans	ASV66
	67	d__Bacteria	p__Proteobacteria	c__Gammaproteobacteria	o__Pseudomonadales_660879	f__Moraxellaceae	g__Psychrobacter	s__aestuarii	ASV67
	68	d__Bacteria	p__Chloroflexota	c__Anaerolineae	o__Ardenticatenales	f__Ardenticatenaceae	g__Ardenticatena	NA	ASV68
	69	d__Bacteria	p__Proteobacteria	c__Gammaproteobacteria	o__Pseudomonadales_641030	f__Halomonadaceae_641030	g__Halomonas_E_640244	NA	ASV69
	70	d__Bacteria	p__Firmicutes_D	c__Bacilli	o__Bacillales_B_302584	f__Bacillaceae_B_301660	g__Rossellomorea	NA	ASV70
	71	d__Bacteria	p__Firmicutes_F	c__Halanaerobiia	o__Halanaerobiales	f__Halanaerobiaceae_43036	g__Halocella_43036	s__Halocella cellulosilytica	ASV71
	72	d__Bacteria	p__Desulfobacterota_I	c__Syntrophobacteria	o__Syntrophobacterales	NA	NA	NA	ASV72
	73	d__Bacteria	p__Proteobacteria	c__Gammaproteobacteria	o__Pseudomonadales_641030	f__Halomonadaceae_641030	g__Halomonas_E_640244	s__smyrnensis	ASV73
	74	d__Archaea	p__Asgardarchaeota	c__Lokiarchaeia	o__CR-4	f__SOKP01	g__SDNM01	s__sp004524535	ASV74
	75	d__Bacteria	p__Spirochaetota	c__Spirochaetia	o__SZUA-6	f__Bin103	g__Bin103	s__sp002238925	ASV75
	76	d__Bacteria	p__Spirochaetota	c__Spirochaetia	o__SZUA-6	f__Bin103	g__Bin103	s__sp002238925	ASV76
	77	d__Bacteria	p__Proteobacteria	c__Gammaproteobacteria	o__Pseudomonadales_641035	f__Marinomonadaceae	g__Marinomonas	s__ostreistagni	ASV77
	78	d__Bacteria	p__Chloroflexota	c__Anaerolineae	o__Anaerolineales	NA	NA	NA	ASV78
	79	d__Bacteria	p__Firmicutes_D	c__Bacilli	o__Lactobacillales	f__Lactobacillaceae	g__Leuconostoc_B	s__inhae	ASV79
	80	d__Bacteria	p__Firmicutes_D	c__Bacilli	o__Lactobacillales	f__Streptococcaceae	g__Lactococcus_A_343306	s__raffinolactis	ASV80
	81	d__Bacteria	p__Firmicutes_D	c__Bacilli	o__Lactobacillales	f__Streptococcaceae	g__Streptococcus	s__agalactiae	ASV81
	82	d__Bacteria	p__Proteobacteria	c__Alphaproteobacteria	o__Kiloniellales	NA	NA	NA	ASV82
	83	d__Bacteria	p__Chloroflexota	c__Dehalococcoidia	o__Dehalococcoidales	NA	NA	NA	ASV83
	84	d__Bacteria	p__Proteobacteria	c__Gammaproteobacteria	o__Acidiferrobacterales	NA	NA	NA	ASV84
	85	d__Bacteria	p__Chloroflexota	c__Anaerolineae	o__Anaerolineales	NA	NA	NA	ASV85
	86	d__Bacteria	p__Chloroflexota	c__Anaerolineae	NA	NA	NA	NA	ASV86
	87	d__Bacteria	p__Proteobacteria	c__Gammaproteobacteria	o__GCA-2729495	f__GCA-2729495	g__GCA-002729875	s__sp002688175	ASV87
	88	d__Archaea	p__Methanobacteriota_B	c__Thermococci	o__Methanofastidiosales	f__Methanofastidiosaceae	NA	NA	ASV88
	89	d__Bacteria	p__Actinobacteriota	c__Thermoleophilia	o__Solirubrobacterales	f__70-9	NA	NA	ASV89
	90	d__Bacteria	p__Firmicutes_D	c__Bacilli	o__Bacillales_B_302584	f__Bacillaceae_B_301660	g__Rossellomorea	NA	ASV90
	91	d__Bacteria	p__Proteobacteria	c__Gammaproteobacteria	o__Competibacterales	f__Competibacteraceae	NA	NA	ASV91
	92	d__Bacteria	p__Proteobacteria	c__Alphaproteobacteria	NA	NA	NA	NA	ASV92
	93	d__Bacteria	p__Firmicutes_D	c__Bacilli	o__Bacillales_B_302584	f__DSM-18226_301387	g__Mesobacillus_A_295502	NA	ASV94
	94	d__Bacteria	p__Actinobacteriota	c__Actinomycetia	o__Actinomycetales	f__Dermatophilaceae_390796	g__Marihabitans_390548	s__Marihabitans melonis	ASV95
	95	d__Bacteria	p__Proteobacteria	c__Gammaproteobacteria	o__QQUJ01	f__QQUJ01	g__QQUJ01	NA	ASV96
	96	d__Bacteria	p__Desulfobacterota_I	c__Desulfobacteria	o__Desulfobacterales	f__UBA11574	g__S5133MH16	s__sp004193595	ASV97
	97	d__Bacteria	p__Proteobacteria	c__Gammaproteobacteria	NA	NA	NA	NA	ASV98
	98	d__Bacteria	p__Proteobacteria	c__Gammaproteobacteria	o__Pseudomonadales_641030	f__Halomonadaceae_641030	g__Halomonas_E_640244	NA	ASV99
	99	d__Bacteria	p__Proteobacteria	c__Alphaproteobacteria	o__Rhizobiales_A_504705	f__Xanthobacteraceae_503485	NA	NA	ASV100
	100	d__Bacteria	p__Proteobacteria	c__Gammaproteobacteria	NA	NA	NA	NA	ASV101
	101	d__Bacteria	p__Firmicutes_D	c__Bacilli	o__Bacillales_B_302584	f__DSM-18226_301387	NA	NA	ASV102
	102	d__Archaea	p__Thermoproteota	c__Bathyarchaeia	o__B26-1	f__BA1	g__BA2	s__sp001399795	ASV103
	103	d__Bacteria	p__Proteobacteria	c__Gammaproteobacteria	o__Enterobacterales_A_737866	f__Vibrionaceae	g__Vibrio_678715	s__Vibrio alginolyticus_673799	ASV104
	104	d__Bacteria	p__Calditrichota	c__Calditrichia	o__RBG-13-44-9	f__J042	g__J075	NA	ASV105
	105	d__Bacteria	p__Proteobacteria	c__Alphaproteobacteria	o__Rhodobacterales	f__Rhodobacteraceae	g__Phaeobacter	s__italicus	ASV106
	106	d__Bacteria	p__Desulfobacterota_I	c__Desulfobacteria	o__Desulfobacterales	f__SG8-13	g__SG8-13	s__sp001303025	ASV107
	107	d__Bacteria	p__Bacteroidota	c__Bacteroidia	o__Bacteroidales	f__UBA10428	g__JAAAOM01	NA	ASV108
	108	d__Bacteria	p__Proteobacteria	c__Gammaproteobacteria	NA	NA	NA	NA	ASV109
	109	d__Bacteria	p__Campylobacterota	c__Campylobacteria	o__Campylobacterales	f__Sulfurimonadaceae	NA	NA	ASV110
	110	d__Bacteria	p__Proteobacteria	c__Gammaproteobacteria	o__Woeseiales	f__Woeseiaceae	g__SP4260	NA	ASV111
	111	d__Bacteria	p__Proteobacteria	c__Gammaproteobacteria	o__VBWC01	f__VBWC01	g__VBWC01	s__sp006218035	ASV112
	112	d__Bacteria	p__Proteobacteria	c__Gammaproteobacteria	o__Pseudomonadales_650612	f__Cellvibrionaceae	g__Microbulbifer	s__taiwanensis	ASV113
	113	d__Bacteria	p__Bacteroidota	c__Bacteroidia	o__Bacteroidales	f__GCA-2748055	g__GCA-2748055	NA	ASV114
	114	d__Archaea	p__Thermoproteota	c__Bathyarchaeia	o__B26-1	f__UBA233	g__PALSA-986	s__sp003589585	ASV115
	115	d__Archaea	p__Thermoproteota	c__Bathyarchaeia	o__B26-1	f__BA1	g__BA2	s__sp001399795	ASV116
	116	d__Bacteria	p__Gemmatimonadota	c__Gemmatimonadetes	o__Longimicrobiales	f__RSA9	g__RSA9	NA	ASV117
	117	d__Bacteria	p__Proteobacteria	c__Gammaproteobacteria	o__Enterobacterales_A_737866	f__Vibrionaceae	g__Vibrio_678715	s__Vibrio galatheae	ASV118
	118	d__Bacteria	p__Actinobacteriota	c__Acidimicrobiia_402965	o__UBA5794	f__UBA5794	g__SZUA-442	s__sp003235475	ASV119
	119	d__Bacteria	p__Campylobacterota	c__Campylobacteria	o__Campylobacterales	f__Sulfurimonadaceae	NA	NA	ASV120
	120	d__Bacteria	p__Proteobacteria	c__Gammaproteobacteria	NA	NA	NA	NA	ASV122
	121	d__Bacteria	p__Gemmatimonadota	c__Gemmatimonadetes	o__KS3-K002	f__JABDQB01	g__JAAXHJ01	s__sp009838765	ASV123
	122	d__Bacteria	p__Proteobacteria	c__Gammaproteobacteria	o__GCA-2729495	f__GCA-2729495	g__GCA-002729875	s__sp002688175	ASV124
	123	d__Bacteria	p__Chloroflexota	c__Anaerolineae	o__Anaerolineales	NA	NA	NA	ASV125
	124	d__Bacteria	p__Proteobacteria	c__Gammaproteobacteria	o__Enterobacterales_A_737866	f__Vibrionaceae	g__Vibrio_678715	s__Vibrio nigripulchritudo	ASV126
	125	d__Bacteria	p__Firmicutes_D	c__Bacilli	o__Lactobacillales	f__Streptococcaceae	g__Streptococcus	s__thermophilus	ASV127
	126	d__Bacteria	p__Firmicutes_D	c__Bacilli	o__Bacillales_B_302584	f__Bacillaceae_B_301660	g__Rossellomorea	NA	ASV128
	127	d__Bacteria	p__Firmicutes_F	c__Halanaerobiia	o__Halanaerobiales	f__Halanaerobiaceae_43036	g__Halocella_43036	s__Halocella cellulosilytica	ASV129
	128	d__Bacteria	p__Nitrospirota_A_437815	c__Thermodesulfovibrionia	o__Thermodesulfovibrionales	f__UBA6898	g__GW-Nitrospira-1	s__sp002839535	ASV130
	129	d__Bacteria	p__Firmicutes_D	c__Bacilli	o__Bacillales_D_310495	f__Halobacillaceae	g__Halobacillus_A_288222	s__naozhouensis	ASV131
	130	d__Bacteria	p__Proteobacteria	c__Gammaproteobacteria	o__VBWC01	f__VBWC01	g__VBWC01	s__sp006218035	ASV132
	131	d__Bacteria	p__Firmicutes_D	c__Bacilli	o__Lactobacillales	f__Streptococcaceae	g__Lactococcus_A_343306	s__raffinolactis	ASV133
	132	d__Bacteria	p__Proteobacteria	NA	NA	NA	NA	NA	ASV134
	133	d__Bacteria	p__Proteobacteria	c__Gammaproteobacteria	NA	NA	NA	NA	ASV135
	134	d__Bacteria	p__Proteobacteria	c__Gammaproteobacteria	o__Chromatiales_602961	f__Sedimenticolaceae	g__JABBTK01	s__sp011389885	ASV136
	135	d__Bacteria	p__Proteobacteria	c__Gammaproteobacteria	o__Enterobacterales_A_737866	f__Alteromonadaceae_665222	g__Idiomarina	s__piscisalsi	ASV137
	136	d__Bacteria	p__Chloroflexota	c__Anaerolineae	o__B4-G1	f__DUEL01	g__SpSt-77	NA	ASV138
	137	d__Bacteria	p__Chloroflexota	c__Anaerolineae	NA	NA	NA	NA	ASV139
	138	d__Bacteria	p__Myxococcota_A_473307	c__Polyangia_463783	o__Polyangiales	f__SG8-38	g__SG8-38	NA	ASV140
	139	d__Bacteria	p__Spirochaetota	c__Spirochaetia	o__SZUA-6	f__Bin103	g__Bin103	s__sp002238925	ASV141
	140	d__Bacteria	p__Proteobacteria	c__Gammaproteobacteria	o__Methylococcales	f__Methylothermaceae	NA	NA	ASV142
	141	d__Bacteria	p__Firmicutes_D	c__Bacilli	o__Lactobacillales	f__Streptococcaceae	g__Lactococcus_A_343306	s__carnosus	ASV143
	142	d__Bacteria	p__Chloroflexota	c__Anaerolineae	o__Anaerolineales	f__UBA4823	NA	NA	ASV144
	143	d__Bacteria	p__Chloroflexota	c__Anaerolineae	o__Anaerolineales	NA	NA	NA	ASV145
	144	d__Bacteria	p__Proteobacteria	c__Gammaproteobacteria	o__Arenicellales	NA	NA	NA	ASV147
	145	d__Bacteria	p__Desulfobacterota_I	c__Syntrophobacteria	o__Syntrophobacterales	NA	NA	NA	ASV148
	146	d__Bacteria	p__Firmicutes_A	c__Clostridia_258483	o__Lachnospirales	f__DSM-24629	g__Natranaerovirga	NA	ASV149
	147	d__Bacteria	p__Firmicutes_D	c__Bacilli	o__Bacillales_B_302584	f__Bacillaceae_B_301660	g__Rossellomorea	NA	ASV150
	148	d__Bacteria	p__Proteobacteria	c__Gammaproteobacteria	o__Methylococcales	f__Methylothermaceae	NA	NA	ASV151
	149	d__Bacteria	p__Chloroflexota	c__Anaerolineae	o__Anaerolineales	f__UBA4823	NA	NA	ASV152
	150	d__Bacteria	p__Bacteroidota	c__Bacteroidia	o__Bacteroidales	f__GCA-2748055	g__GCA-2748055	s__sp011056635	ASV153
	151	d__Bacteria	p__Firmicutes_D	c__Bacilli	o__Bacillales_B_302584	f__Bacillaceae_B_301660	g__Bacillus_BM	s__salacetis	ASV154
	152	d__Bacteria	p__Firmicutes_D	c__Bacilli	o__Bacillales_G_286742	NA	NA	NA	ASV155
	153	d__Bacteria	p__Nitrospirota_A_437815	c__Thermodesulfovibrionia	o__Thermodesulfovibrionales	f__UBA6898	g__GW-Nitrospira-1	s__sp002839535	ASV156
	154	d__Bacteria	p__Firmicutes_D	c__Bacilli	o__Bacillales_B_302584	f__DSM-18226_301387	g__Mesobacillus_A_295502	NA	ASV157
	155	d__Bacteria	p__Myxococcota_A_473307	c__Bradymonadia	o__Bradymonadales	f__Bradymonadaceae	g__Persicimonas	s__caeni	ASV158
	156	d__Bacteria	p__Firmicutes_A	c__Clostridia_258483	o__Lachnospirales	f__Lachnospiraceae	g__Lacrimispora	NA	ASV159
	157	d__Bacteria	p__Firmicutes_D	c__Bacilli	o__Bacillales_D_310495	f__Halobacillaceae	g__Halobacillus_A_288222	s__naozhouensis	ASV160
	158	d__Bacteria	p__Proteobacteria	c__Gammaproteobacteria	o__Pseudomonadales_641030	f__Halomonadaceae_641030	g__Halomonas_E_640244	NA	ASV161
	159	d__Bacteria	p__Gemmatimonadota	c__Gemmatimonadetes	o__Longimicrobiales	f__UBA6960	g__UBA2982	NA	ASV162
	160	d__Bacteria	p__Proteobacteria	c__Gammaproteobacteria	NA	NA	NA	NA	ASV163
	161	d__Bacteria	p__Calditrichota	c__Calditrichia	o__RBG-13-44-9	f__J042	g__J075	NA	ASV164
	162	d__Bacteria	p__Chloroflexota	c__Anaerolineae	o__Ardenticatenales	f__Ardenticatenaceae	g__Ardenticatena	NA	ASV165
	163	d__Bacteria	p__Bacteroidota	c__Ignavibacteria	o__Ignavibacteriales	f__Ignavibacteriaceae_785640	NA	NA	ASV166
	164	d__Archaea	p__Thermoproteota	c__Bathyarchaeia	o__B26-1	f__BA1	g__BA2	s__sp001399795	ASV167
	165	d__Bacteria	p__Proteobacteria	c__Gammaproteobacteria	o__Pseudomonadales_641035	f__Marinomonadaceae	g__Marinomonas	s__ostreistagni	ASV168
	166	d__Bacteria	p__Bacteroidota	c__Bacteroidia	o__Cytophagales	f__Thermonemataceae_910791	NA	NA	ASV169
	167	d__Bacteria	p__Proteobacteria	c__Gammaproteobacteria	o__Enterobacterales_A_737866	f__Vibrionaceae	g__Vibrio_678715	NA	ASV170
	168	d__Bacteria	p__Deinococcota	c__Deinococci	o__Deinococcales	f__Trueperaceae	g__JAABTL01	s__sp011390735	ASV171
	169	d__Bacteria	p__Proteobacteria	c__Gammaproteobacteria	o__Tenderiales	f__Tenderiaceae	g__Tenderia	s__electrophaga	ASV172
	170	d__Bacteria	p__Firmicutes_D	c__Bacilli	o__Bacillales_D_310495	f__Halobacillaceae	g__Pontibacillus_A	s__salipaludis	ASV173
	171	d__Bacteria	p__Desulfobacterota_I	c__DSM-4660	o__Desulfatiglandales	f__HGW-15	NA	NA	ASV174
	172	d__Bacteria	p__Firmicutes_F	c__Halanaerobiia	o__Halanaerobiales	f__Halanaerobiaceae_43036	g__Halocella_43036	s__Halocella cellulosilytica	ASV175
	173	d__Bacteria	p__Firmicutes_D	c__Bacilli	o__Lactobacillales	f__Carnobacteriaceae	g__Carnobacterium_A_320617	s__maltaromaticum	ASV176
	174	d__Bacteria	p__Chloroflexota	c__Anaerolineae	o__Anaerolineales	NA	NA	NA	ASV177
	175	d__Archaea	p__Thermoproteota	c__Bathyarchaeia	o__B26-1	f__UBA233	g__PALSA-986	NA	ASV178
	176	d__Bacteria	p__Firmicutes_D	c__Bacilli	o__Bacillales_B_302584	f__DSM-18226_301387	g__Mesobacillus_A_295502	NA	ASV179
	177	d__Archaea	p__Thermoproteota	c__Bathyarchaeia	o__B26-1	f__BA1	g__BA2	s__sp001399795	ASV180
	178	d__Bacteria	p__Proteobacteria	c__Alphaproteobacteria	NA	NA	NA	NA	ASV181
	179	d__Bacteria	p__Firmicutes_D	c__Bacilli	o__Bacillales_B_302584	f__DSM-18226_301387	g__Mesobacillus_A_295502	NA	ASV182
	180	d__Bacteria	p__Firmicutes_D	c__Bacilli	o__Bacillales_B_302584	f__Bacillaceae_B_301660	g__Bacillus_BM	s__salacetis	ASV183
	181	d__Archaea	p__Nanoarchaeota	c__Nanoarchaeia	o__Pacearchaeales	f__GW2011-AR1	g__BMS3ABIN17	s__sp002897655	ASV184
	182	d__Bacteria	p__Gemmatimonadota	c__Gemmatimonadetes	o__Longimicrobiales	f__UBA6960	NA	NA	ASV185
	183	d__Bacteria	p__Bacteroidota	c__Bacteroidia	o__Bacteroidales	f__GCA-2748055	g__GCA-2748055	NA	ASV186
	184	d__Bacteria	p__Bacteroidota	c__Bacteroidia	o__Flavobacteriales_877923	f__Flavobacteriaceae	g__Mesonia_832444	s__Mesonia aquimarina	ASV187
	185	d__Bacteria	p__Chloroflexota	c__Dehalococcoidia	o__GIF9	f__AB-539-J10	NA	NA	ASV188
	186	d__Bacteria	p__Proteobacteria	c__Alphaproteobacteria	NA	NA	NA	NA	ASV189
	187	d__Bacteria	p__Proteobacteria	c__Alphaproteobacteria	o__Rhizobiales_A_502138	f__Devosiaceae	NA	NA	ASV190
	188	d__Bacteria	p__Desulfobacterota_I	c__Syntrophobacteria	o__Syntrophobacterales	NA	NA	NA	ASV191
	189	d__Bacteria	p__Chloroflexota	c__Dehalococcoidia	o__Dehalococcoidales	NA	NA	NA	ASV192
	190	d__Bacteria	p__Proteobacteria	c__Gammaproteobacteria	o__Pseudomonadales_641035	f__Marinomonadaceae	g__Marinomonas	s__ostreistagni	ASV193
	191	d__Bacteria	p__Desulfobacterota_I	c__DSM-4660	o__Desulfatiglandales	f__HGW-15	g__JAAZBV01	NA	ASV194
	192	d__Bacteria	p__Bacteroidota	c__Bacteroidia	o__Flavobacteriales_877923	f__Flavobacteriaceae	g__Salegentibacter	NA	ASV195
	193	d__Bacteria	p__Proteobacteria	c__Gammaproteobacteria	o__Pseudomonadales_641030	f__Halomonadaceae_641030	g__Halomonas_E_640244	s__smyrnensis	ASV196
	194	d__Bacteria	p__Zixibacteria	c__MSB-5A5_778960	o__JAABVY01	f__JAABVY01	g__JAABVY01	s__sp011056555	ASV197
	195	d__Bacteria	p__Actinobacteriota	c__Actinomycetia	o__Mycobacteriales	f__Mycobacteriaceae	g__Mycobacterium	NA	ASV198
	196	d__Archaea	p__Thermoproteota	c__Bathyarchaeia	o__B26-1	f__BA1	g__BA2	s__sp001399795	ASV199
	197	d__Bacteria	p__Patescibacteria	c__Paceibacteria	o__Portnoybacterales	f__UBA2143	g__UM-FILTER-43-11-A	NA	ASV200
	198	d__Bacteria	p__Desulfobacterota_I	c__DSM-4660	o__Desulfatiglandales	f__Desulfatiglandaceae	g__B111-G9	s__sp011042035	ASV201
	199	d__Bacteria	p__Proteobacteria	c__Alphaproteobacteria	o__Parvibaculales	f__RS24	NA	NA	ASV202
	200	d__Bacteria	p__Proteobacteria	c__Gammaproteobacteria	o__Enterobacterales_A_737866	f__Alteromonadaceae_665222	g__Pseudoalteromonas	s__atlantica_664252	ASV203
	201	d__Bacteria	p__Proteobacteria	c__Alphaproteobacteria	o__Sphingomonadales	NA	NA	NA	ASV204
	202	d__Bacteria	p__Desulfobacterota_I	c__DSM-4660	o__Desulfatiglandales	f__Desulfatiglandaceae	g__B111-G9	s__sp011042035	ASV205
	203	d__Bacteria	p__Calditrichota	c__Calditrichia	o__Calditrichales	f__Calditrichaceae	NA	NA	ASV206
	204	d__Bacteria	p__Chloroflexota	c__Anaerolineae	NA	NA	NA	NA	ASV207
	205	d__Bacteria	p__Chloroflexota	c__Dehalococcoidia	o__UBA2979	f__UBA2979	NA	NA	ASV208
	206	d__Bacteria	p__Firmicutes_D	c__Bacilli	o__Bacillales_D_310495	f__Halobacillaceae	g__Halobacillus_A_288222	s__salinus	ASV209
	207	d__Bacteria	p__Proteobacteria	c__Gammaproteobacteria	o__Enterobacterales_A_737866	f__Vibrionaceae	g__Vibrio_678715	NA	ASV210
	208	d__Bacteria	p__Proteobacteria	c__Alphaproteobacteria	o__Rhizobiales_A_504705	f__Xanthobacteraceae_503485	NA	NA	ASV211
	209	d__Bacteria	p__Proteobacteria	c__Alphaproteobacteria	o__Rhizobiales_A_504705	f__Beijerinckiaceae	NA	NA	ASV212
	210	d__Bacteria	p__Gemmatimonadota	c__Gemmatimonadetes	NA	NA	NA	NA	ASV213
	211	d__Bacteria	p__Proteobacteria	c__Gammaproteobacteria	o__Enterobacterales_A_737866	f__Vibrionaceae	g__Vibrio_678715	s__Vibrio natriegens	ASV214
	212	d__Bacteria	p__Proteobacteria	c__Gammaproteobacteria	o__Woeseiales	f__Woeseiaceae	g__SP4260	NA	ASV215
	213	d__Bacteria	p__Zixibacteria	c__MSB-5A5_778959	o__UM-FILTER-46-8	f__UM-FILTER-46-8	g__UM-FILTER-46-8	NA	ASV216
	214	d__Bacteria	p__Proteobacteria	c__Gammaproteobacteria	o__Enterobacterales_A_737866	f__Vibrionaceae	g__Vibrio_678715	s__Vibrio alginolyticus_673799	ASV217
	215	d__Bacteria	p__Proteobacteria	c__Gammaproteobacteria	o__Pseudomonadales_650611	f__Pseudomonadaceae	g__Pseudomonas_E_647464	s__bubulae	ASV218
	216	d__Bacteria	p__Chloroflexota	c__Dehalococcoidia	o__Dehalococcoidales	f__W498	g__W498	NA	ASV219
	217	d__Bacteria	p__Firmicutes_D	c__Bacilli	o__Bacillales_D_310495	f__Halobacillaceae	g__Pontibacillus_A	s__marinus	ASV220
	218	d__Bacteria	p__Chloroflexota	c__Anaerolineae	o__Ardenticatenales	f__Ardenticatenaceae	g__Ardenticatena	NA	ASV221
	219	d__Bacteria	p__Spirochaetota	c__Spirochaetia	o__SZUA-6	f__Bin103	g__Bin103	s__sp002238925	ASV222
	220	d__Bacteria	p__Proteobacteria	c__Gammaproteobacteria	o__Pseudomonadales_650611	f__Pseudomonadaceae	g__Pseudomonas_E_647464	s__paracarnis	ASV223
	221	d__Bacteria	p__Proteobacteria	c__Gammaproteobacteria	o__Chromatiales_602636	f__Chromatiaceae_602636	g__Thiohalocapsa_602636	NA	ASV225
	222	d__Bacteria	p__Chloroflexota	c__Anaerolineae	o__Anaerolineales	NA	NA	NA	ASV226
	223	d__Bacteria	p__Deinococcota	c__Deinococci	o__Deinococcales	f__Trueperaceae	g__CSSed10-48	s__sp007695125	ASV227
	224	d__Bacteria	p__Proteobacteria	c__Alphaproteobacteria	o__Rhizobiales_A_501396	f__Rhizobiaceae_A_499470	NA	NA	ASV228
	225	d__Bacteria	p__Proteobacteria	c__Gammaproteobacteria	o__Methylococcales	f__Methylothermaceae	NA	NA	ASV229
	226	d__Archaea	p__Thermoproteota	c__Bathyarchaeia	o__B26-1	f__UBA233	g__PALSA-986	s__sp003589585	ASV230
	227	d__Bacteria	p__Proteobacteria	c__Gammaproteobacteria	o__Enterobacterales_A_737866	f__Vibrionaceae	g__Vibrio_678715	s__Vibrio rumoiensis	ASV231
	228	d__Bacteria	p__Desulfobacterota_I	c__Desulfobacteria	o__Desulfobacterales	f__UBA11574	g__S5133MH16	s__sp004193595	ASV232
	229	d__Bacteria	p__WOR-3	c__UBA3072	o__UBA3072	f__B12-G15	g__DTHG01	NA	ASV233
	230	d__Bacteria	p__Gemmatimonadota	c__Gemmatimonadetes	o__KS3-K002	f__JABDQB01	g__JAAXHJ01	s__sp009838765	ASV234
	231	d__Bacteria	p__Desulfobacterota_E	c__MBNT15	o__MBNT15	f__MBNT15	g__CG2-30-66-27	s__sp007280195	ASV235
	232	d__Bacteria	p__Firmicutes_F	c__Halanaerobiia	o__Halanaerobiales	f__Halanaerobiaceae_43036	g__Halocella_43036	s__Halocella cellulosilytica	ASV236
	233	d__Bacteria	p__Firmicutes_D	c__Bacilli	o__Lactobacillales	f__Lactobacillaceae	g__Leuconostoc_B	s__lactis	ASV238
	234	d__Bacteria	p__Proteobacteria	c__Gammaproteobacteria	o__XJ16	f__Halofilaceae	g__Halofilum	NA	ASV239
	235	d__Bacteria	p__Firmicutes_F	c__Halanaerobiia	o__Halanaerobiales	f__Halanaerobiaceae_43036	g__Halocella_43036	s__Halocella cellulosilytica	ASV240
	236	d__Bacteria	p__Proteobacteria	c__Alphaproteobacteria	o__Rhizobiales_A_504721	f__Rhodomicrobiaceae	g__R-RK-3	s__sp002198715	ASV241
	237	d__Bacteria	p__Proteobacteria	c__Gammaproteobacteria	o__Methylococcales	f__Methylothermaceae	NA	NA	ASV242
	238	d__Bacteria	p__Proteobacteria	c__Alphaproteobacteria	o__Caulobacterales	f__Maricaulaceae	NA	NA	ASV243
	239	d__Bacteria	p__Proteobacteria	c__Gammaproteobacteria	NA	NA	NA	NA	ASV244
	240	d__Bacteria	p__Desulfobacterota_I	c__Desulfobacteria	o__Desulfobacterales	f__Desulfosarcinaceae	g__Desulfatitalea	NA	ASV245
	241	d__Bacteria	p__Chloroflexota	c__Anaerolineae	o__Ardenticatenales	f__Ardenticatenaceae	g__Ardenticatena	NA	ASV246
	242	d__Bacteria	p__Proteobacteria	c__Alphaproteobacteria	NA	NA	NA	NA	ASV247
	243	d__Bacteria	p__Chloroflexota	c__Dehalococcoidia	o__Dehalococcoidales	f__W498	g__W498	NA	ASV248
	244	d__Bacteria	p__Bacteroidota	c__Bacteroidia	o__Flavobacteriales_877923	f__Flavobacteriaceae	g__Gramella	NA	ASV249
	245	d__Bacteria	p__Proteobacteria	c__Alphaproteobacteria	NA	NA	NA	NA	ASV250
	246	d__Bacteria	p__Proteobacteria	c__Gammaproteobacteria	NA	NA	NA	NA	ASV252
	247	d__Bacteria	p__Chloroflexota	c__Anaerolineae	o__Ardenticatenales	f__Ardenticatenaceae	g__Ardenticatena	NA	ASV253
	248	d__Bacteria	p__Chloroflexota	c__Chloroflexia	o__Thermomicrobiales	NA	NA	NA	ASV254
	249	d__Bacteria	p__Gemmatimonadota	c__Gemmatimonadetes	o__KS3-K002	f__JABDQB01	g__JAAXHJ01	s__sp009838765	ASV255
	250	d__Archaea	p__Thermoproteota	c__Bathyarchaeia	o__B26-1	f__UBA233	g__PALSA-986	s__sp003589585	ASV256
	251	d__Bacteria	p__Acidobacteriota	c__Aminicenantia	o__Aminicenantales	f__Aminicenantaceae	NA	NA	ASV258
	252	d__Bacteria	p__Proteobacteria	c__Gammaproteobacteria	o__Pseudomonadales_660879	f__Moraxellaceae	g__Psychrobacter	s__maritimus	ASV259
	253	d__Bacteria	p__Firmicutes_G	c__UBA4882	o__UBA8346	f__UBA8346	g__Hydrogenispora	s__ethanolica	ASV260
	254	d__Bacteria	p__Proteobacteria	c__Gammaproteobacteria	o__Pseudomonadales_660954	f__HTCC2089_660954	NA	NA	ASV261
	255	d__Bacteria	p__Desulfobacterota_I	c__Desulfobaccia	o__Desulfobaccales	f__Desulfobaccaceae	g__Desulfobacca	NA	ASV262
	256	d__Bacteria	p__Proteobacteria	c__Alphaproteobacteria	o__Rhizobiales_A_501394	f__Rhizobiaceae_A_501394	g__Georhizobium	s__haloflavum	ASV263
	257	d__Bacteria	p__Proteobacteria	c__Gammaproteobacteria	o__Pseudomonadales_641030	f__Halomonadaceae_641030	NA	NA	ASV264
	258	d__Bacteria	p__Desulfobacterota_I	c__Syntrophobacteria	o__Syntrophobacterales	NA	NA	NA	ASV265
	259	d__Bacteria	p__Proteobacteria	c__Gammaproteobacteria	o__Enterobacterales_A_737866	f__Vibrionaceae	g__Vibrio_678715	s__Vibrio parahaemolyticus_673797	ASV268
	260	d__Archaea	p__Thermoproteota	c__Bathyarchaeia	o__B26-1	f__BA1	g__BA2	s__sp001399795	ASV269
	261	d__Bacteria	p__Deinococcota	c__Deinococci	o__Deinococcales	f__Trueperaceae	g__CSSed10-48	s__sp007695125	ASV270
	262	d__Bacteria	p__Gemmatimonadota	c__Gemmatimonadetes	o__KS3-K002	f__JABDQB01	g__JAAXHJ01	s__sp009838765	ASV271
	263	d__Bacteria	p__Chloroflexota	c__Anaerolineae	o__Ardenticatenales	f__Ardenticatenaceae	g__Ardenticatena	NA	ASV272
	264	d__Bacteria	p__Proteobacteria	c__Gammaproteobacteria	o__Thiomicrospirales	f__Thiomicrospiraceae	NA	NA	ASV273
	265	d__Bacteria	p__Zixibacteria	c__MSB-5A5_778960	o__GN15	f__PGXB01	NA	NA	ASV274
	266	d__Bacteria	p__Acidobacteriota	c__Thermoanaerobaculia	o__Thermoanaerobaculales	NA	NA	NA	ASV275
	267	d__Bacteria	p__Desulfobacterota_I	c__Desulfobacteria	o__Desulfobacterales	f__SG8-13	g__SG8-13	s__sp001303025	ASV276
	268	d__Bacteria	p__Campylobacterota	c__Campylobacteria	o__Campylobacterales	f__Sulfurimonadaceae	g__Sulfurimonas	s__sp002733945	ASV277
	269	d__Bacteria	p__Actinobacteriota	c__Acidimicrobiia_401430	o__IMCC26256	f__PALSA-555	g__SHUY01	NA	ASV279
	270	d__Bacteria	p__Chloroflexota	c__Anaerolineae	NA	NA	NA	NA	ASV280
	271	d__Bacteria	p__Actinobacteriota	c__Humimicrobiia	o__Humimicrobiales	f__Humimicrobiaceae	g__Halolacustris	NA	ASV281
	272	d__Bacteria	p__Desulfobacterota_I	c__DSM-4660	o__Desulfatiglandales	f__HGW-15	NA	NA	ASV282
	273	d__Bacteria	p__Desulfobacterota_I	c__DSM-4660	o__Desulfatiglandales	f__Desulfatiglandaceae	NA	NA	ASV283
	274	d__Bacteria	p__Zixibacteria	c__MSB-5A5_778960	o__GN15	f__PGXB01	NA	NA	ASV284
	275	d__Bacteria	p__Planctomycetota	c__Planctomycetia	o__Pirellulales	f__Lacipirellulaceae	g__Pirellulimonas	s__nuda	ASV285
	276	d__Bacteria	p__Proteobacteria	c__Alphaproteobacteria	o__Rhizobiales_A_504705	f__Xanthobacteraceae_503485	NA	NA	ASV286
	277	d__Bacteria	p__Proteobacteria	c__Alphaproteobacteria	o__Rhizobiales_A_504721	f__Rhodomicrobiaceae	NA	NA	ASV287
	278	d__Bacteria	p__Proteobacteria	c__Gammaproteobacteria	o__Enterobacterales_A_737866	f__Alteromonadaceae_665222	g__Alteromonas_F	s__halophila	ASV288
	279	d__Bacteria	p__Proteobacteria	c__Gammaproteobacteria	o__Pseudomonadales_641035	f__Marinomonadaceae	g__Marinomonas	s__aquimarina	ASV289
	280	d__Bacteria	p__Actinobacteriota	c__Actinomycetia	o__Mycobacteriales	f__Mycobacteriaceae	g__Mycobacterium	s__gadium	ASV290
	281	d__Bacteria	p__Proteobacteria	c__Gammaproteobacteria	o__Woeseiales	f__Woeseiaceae	g__SP4260	NA	ASV291
	282	d__Bacteria	p__Proteobacteria	c__Gammaproteobacteria	o__Ectothiorhodospirales	f__Acidihalobacteraceae	g__Acidihalobacter_A	s__ferrooxydans	ASV292
	283	d__Bacteria	p__Firmicutes_A	c__Clostridia_258483	o__Lachnospirales	f__Lachnospiraceae	g__Lachnotalea	NA	ASV293
	284	d__Bacteria	p__Desulfobacterota_G_459544	c__BSN033	o__B13-G15	NA	NA	NA	ASV294
	285	d__Bacteria	p__Actinobacteriota	c__Acidimicrobiia_401430	o__Acidimicrobiales	f__Ilumatobacteraceae	g__Ilumatobacter_A	NA	ASV295
	286	d__Bacteria	p__Proteobacteria	c__Gammaproteobacteria	o__Enterobacterales_A_737866	f__Vibrionaceae	g__Vibrio_678715	s__Vibrio rumoiensis	ASV296
	287	d__Bacteria	p__Proteobacteria	c__Gammaproteobacteria	o__Methylococcales	f__Methylothermaceae	NA	NA	ASV297
	288	d__Bacteria	p__Myxococcota_A_473307	c__Polyangia_463783	o__Polyangiales	f__SG8-38	g__SG8-38	NA	ASV298
	289	d__Bacteria	p__Chloroflexota	c__Anaerolineae	NA	NA	NA	NA	ASV299
	290	d__Bacteria	p__Firmicutes_D	c__Bacilli	o__Bacillales_B_306089	f__Bacillaceae_H_289398	g__Priestia	s__megaterium	ASV300
	291	d__Bacteria	p__Proteobacteria	c__Gammaproteobacteria	NA	NA	NA	NA	ASV301
	292	d__Bacteria	p__Proteobacteria	c__Alphaproteobacteria	o__Rhodobacterales	f__Rhodobacteraceae	g__Actibacterium_A	NA	ASV302
	293	d__Bacteria	p__Proteobacteria	c__Alphaproteobacteria	o__Geminicoccales	f__Geminicoccaceae	g__Arboricoccus	s__pini	ASV303
	294	d__Bacteria	p__Proteobacteria	c__Gammaproteobacteria	o__DSM-19610	f__DSM-19610	g__Thiogranum	s__longum	ASV304
	295	d__Bacteria	p__Chloroflexota	c__Dehalococcoidia	o__DSTF01	f__WHTK01	g__WHTK01	s__sp009377745	ASV306
	296	d__Bacteria	p__Desulfobacterota_I	c__Desulfobaccia	o__Desulfobaccales	f__Desulfobaccaceae	g__Desulfobacca	NA	ASV307
	297	d__Bacteria	p__Firmicutes_A	c__Clostridia_258483	o__Tissierellales	f__SIT17	g__Senegalia	s__massiliensis	ASV308
	298	d__Bacteria	p__Chloroflexota	c__Anaerolineae	o__B4-G1	f__DUEL01	g__SpSt-77	NA	ASV309
	299	d__Bacteria	p__Proteobacteria	c__Gammaproteobacteria	o__GCA-2729495	f__GCA-2729495	g__GCA-002729875	s__sp002688175	ASV310
	300	d__Bacteria	p__Proteobacteria	c__Gammaproteobacteria	NA	NA	NA	NA	ASV311
	301	d__Bacteria	p__Proteobacteria	c__Alphaproteobacteria	o__Rhizobiales_A_504705	f__Xanthobacteraceae_503485	NA	NA	ASV312
	302	d__Bacteria	p__Proteobacteria	c__Gammaproteobacteria	o__Pseudomonadales_637066	f__Oleiphilaceae_637066	g__Marinobacter_A_637054	s__zhanjiangensis	ASV313
	303	d__Bacteria	p__Actinobacteriota	c__Thermoleophilia	o__Solirubrobacterales	f__70-9	NA	NA	ASV314
	304	d__Bacteria	p__Proteobacteria	c__Gammaproteobacteria	o__Pseudomonadales_660879	f__Moraxellaceae	g__Psychrobacter	s__celer	ASV315
	305	d__Archaea	p__Thermoproteota	c__Bathyarchaeia	o__B26-1	f__UBA233	g__PALSA-986	NA	ASV316
	306	d__Archaea	p__Nanoarchaeota	c__Nanoarchaeia	o__Pacearchaeales	f__GW2011-AR1	g__BMS3ABIN17	s__sp002897655	ASV317
	307	d__Bacteria	p__Proteobacteria	c__Alphaproteobacteria	o__Geminicoccales	f__Geminicoccaceae	NA	NA	ASV318
	308	d__Bacteria	p__Proteobacteria	c__Gammaproteobacteria	o__XJ16	f__Halofilaceae	g__Halofilum	NA	ASV319
	309	d__Bacteria	p__Proteobacteria	c__Alphaproteobacteria	o__Geminicoccales	f__Geminicoccaceae	NA	NA	ASV320
	310	d__Bacteria	p__Chloroflexota	c__Anaerolineae	o__Anaerolineales	f__UBA4823	NA	NA	ASV321
	311	d__Bacteria	p__Bacteroidota	c__Bacteroidia	o__Bacteroidales	f__GCA-2748055	g__GCA-2748055	NA	ASV322
	312	d__Bacteria	p__Proteobacteria	c__Gammaproteobacteria	o__Enterobacterales_A_737866	f__Vibrionaceae	g__Vibrio_678715	NA	ASV323
	313	d__Bacteria	p__Actinobacteriota	c__Acidimicrobiia_402965	o__UBA5794	f__UBA5794	g__SZUA-442	s__sp003235475	ASV324
	314	d__Bacteria	p__Spirochaetota	c__Spirochaetia	o__SZUA-6	f__Bin103	g__Bin103	s__sp002238925	ASV325
	315	d__Bacteria	p__Gemmatimonadota	c__Gemmatimonadetes	o__Longimicrobiales	f__RSA9	g__RSA9	NA	ASV326
	316	d__Bacteria	p__Proteobacteria	c__Gammaproteobacteria	o__Pseudomonadales_641030	f__Halomonadaceae_641030	g__Halomonas_E_640244	NA	ASV327
	317	d__Bacteria	p__Myxococcota_A_473307	c__UBA9160	o__UBA9160	f__UBA6930	g__DSOP01	s__sp011055735	ASV328
	318	d__Bacteria	p__Bacteroidota	c__Rhodothermia	o__Balneolales	f__Balneolaceae	NA	NA	ASV329
	319	d__Bacteria	p__Firmicutes_D	c__Bacilli	o__Bacillales_D_310495	f__Halobacillaceae	g__Halobacillus_A_288222	s__naozhouensis	ASV330
	320	d__Bacteria	p__Desulfobacterota_I	c__Syntrophobacteria	o__Syntrophobacterales	NA	NA	NA	ASV331
	321	d__Bacteria	p__Proteobacteria	c__Gammaproteobacteria	o__Pseudomonadales_650716	f__HTCC2089_650716	NA	NA	ASV332
	322	d__Bacteria	p__Proteobacteria	c__Gammaproteobacteria	o__Enterobacterales_A_737866	f__Vibrionaceae	g__Vibrio_678715	s__Vibrio mytili	ASV334
	323	d__Bacteria	p__Proteobacteria	c__Alphaproteobacteria	o__Rhizobiales_A_504705	f__Beijerinckiaceae	NA	NA	ASV335
	324	d__Bacteria	p__Chloroflexota	c__Dehalococcoidia	NA	NA	NA	NA	ASV336
	325	d__Bacteria	p__Proteobacteria	c__Gammaproteobacteria	NA	NA	NA	NA	ASV337
	326	d__Bacteria	p__Actinobacteriota	c__Actinomycetia	o__Mycobacteriales	f__Mycobacteriaceae	g__Mycobacterium	NA	ASV338
	327	d__Bacteria	p__Actinobacteriota	c__Actinomycetia	o__Mycobacteriales	f__Mycobacteriaceae	g__Mycobacterium	NA	ASV339
	328	d__Bacteria	p__Desulfobacterota_D	c__UBA1144	o__RKRQ01	f__RKRQ01	g__RKRQ01	NA	ASV340
	329	d__Bacteria	p__Proteobacteria	c__Gammaproteobacteria	o__Pseudomonadales_650612	f__Cellvibrionaceae	g__Microbulbifer	NA	ASV341
	330	d__Bacteria	p__Acidobacteriota	c__Vicinamibacteria	o__Fen-336	f__Fen-336	g__WYBL01	s__sp011526565	ASV342
	331	d__Bacteria	p__Proteobacteria	c__Gammaproteobacteria	o__Pseudomonadales_650611	f__Pseudomonadaceae	g__Pseudomonas_O_647615	s__parafulva	ASV343
	332	d__Bacteria	p__Desulfobacterota_I	c__DSM-4660	o__Desulfatiglandales	f__Desulfatiglandaceae	g__UBA5623	NA	ASV344
	333	d__Bacteria	p__Bacteroidota	c__Bacteroidia	o__Bacteroidales	f__Salinivirgaceae	g__Salinivirga	NA	ASV345
	334	d__Archaea	p__Thermoproteota	c__Bathyarchaeia	o__B26-1	f__UBA233	g__PALSA-986	s__sp003589585	ASV346
	335	d__Bacteria	p__Proteobacteria	c__Alphaproteobacteria	NA	NA	NA	NA	ASV347
	336	d__Bacteria	p__Desulfobacterota_I	c__DSM-4660	o__Desulfatiglandales	f__Desulfatiglandaceae	g__UBA5623	NA	ASV348
	337	d__Bacteria	p__Nitrospirota_A_437815	c__Thermodesulfovibrionia	o__UBA6902	f__UBA6902	g__BMS3ABIN06	s__sp002897895	ASV349
	338	d__Bacteria	p__Proteobacteria	c__Alphaproteobacteria	NA	NA	NA	NA	ASV350
	339	d__Bacteria	p__Proteobacteria	c__Alphaproteobacteria	o__Rhizobiales_A_504721	f__Methyloligellaceae	g__Methyloceanibacter	NA	ASV351
	340	d__Bacteria	p__Proteobacteria	c__Gammaproteobacteria	NA	NA	NA	NA	ASV352
	341	d__Bacteria	p__Proteobacteria	c__Alphaproteobacteria	NA	NA	NA	NA	ASV353
	342	d__Bacteria	p__Desulfobacterota_I	c__Desulfobacteria	o__Desulfobacterales	f__UBA11574	g__S5133MH16	s__sp004193595	ASV354
	343	d__Bacteria	p__Proteobacteria	c__Gammaproteobacteria	o__HK1	f__HK1	NA	NA	ASV355
	344	d__Bacteria	p__Desulfobacterota_I	c__DSM-4660	o__Desulfatiglandales	f__HGW-15	g__JAAZBV01	NA	ASV356
	345	d__Archaea	p__Nanoarchaeota	c__Nanoarchaeia	o__Pacearchaeales	f__GW2011-AR1	g__BMS3ABIN17	s__sp002897655	ASV357
	346	d__Bacteria	p__Gemmatimonadota	c__Gemmatimonadetes	o__Longimicrobiales	f__UBA6960	g__UBA2982	s__sp009692205	ASV358
	347	d__Bacteria	p__Firmicutes_F	c__Halanaerobiia	o__Halanaerobiales	f__DTU029	g__Halocella_43035	NA	ASV359
	348	d__Bacteria	p__Chloroflexota	c__Dehalococcoidia	o__GIF9	f__AB-539-J10	NA	NA	ASV360
	349	d__Bacteria	p__Chloroflexota	c__Anaerolineae	o__Anaerolineales	f__EnvOPS12	NA	NA	ASV361
	350	d__Bacteria	p__Desulfobacterota_G_459544	c__BSN033	o__B13-G15	NA	NA	NA	ASV362
	351	d__Bacteria	p__Desulfobacterota_I	c__Desulfobacteria	o__Desulfobacterales	f__UBA11574	g__S5133MH16	s__sp004193595	ASV363
	352	d__Bacteria	p__Proteobacteria	c__Gammaproteobacteria	o__GCA-2729495	f__GCA-2729495	g__GCA-002729875	s__sp002688175	ASV364
	353	d__Bacteria	p__Campylobacterota	c__Campylobacteria	o__Campylobacterales	f__Sulfurovaceae	g__Sulfurovum	s__aggregans	ASV365
	354	d__Bacteria	p__Proteobacteria	c__Gammaproteobacteria	o__Pseudomonadales_660879	f__Moraxellaceae	g__Moraxella_A_651124	s__cinereus	ASV366
	355	d__Bacteria	p__Proteobacteria	c__Gammaproteobacteria	NA	NA	NA	NA	ASV367
	356	d__Bacteria	p__Proteobacteria	c__Gammaproteobacteria	NA	NA	NA	NA	ASV368
	357	d__Bacteria	p__Gemmatimonadota	c__Gemmatimonadetes	o__Longimicrobiales	f__UBA6960	g__UBA2982	s__sp009692205	ASV369
	358	d__Bacteria	p__Spirochaetota	c__Spirochaetia	o__DSM-16054	f__Sediminispirochaetaceae	g__DSBN01	s__sp011046055	ASV370
	359	d__Bacteria	p__Proteobacteria	c__Gammaproteobacteria	o__Pseudomonadales_637066	f__Oleiphilaceae_637066	g__Marinobacter_A_637054	s__salsuginis	ASV371
	360	d__Bacteria	p__Proteobacteria	c__Gammaproteobacteria	o__Chromatiales_598058	f__Thioprofundaceae	g__Thioprofundum	NA	ASV372
	361	d__Bacteria	p__Desulfobacterota_I	c__Syntrophobacteria	o__Syntrophobacterales	NA	NA	NA	ASV373
	362	d__Bacteria	p__Proteobacteria	c__Gammaproteobacteria	o__UBA6429	f__UBA6429	g__Thiohalophilus	s__thiocyanatoxydans	ASV374
	363	d__Archaea	p__Thermoproteota	c__Bathyarchaeia	o__B26-1	f__BA1	g__BA2	s__sp001399795	ASV375
	364	d__Bacteria	p__Nitrospirota_A_437815	c__Thermodesulfovibrionia	o__Thermodesulfovibrionales	NA	NA	NA	ASV376
	365	d__Bacteria	p__Desulfobacterota_I	c__Syntrophobacteria	o__Syntrophobacterales	NA	NA	NA	ASV377
	366	d__Bacteria	p__Proteobacteria	c__Gammaproteobacteria	o__HK1	f__HK1	g__HK1	s__sp000583135	ASV378
	367	d__Bacteria	p__Proteobacteria	c__Gammaproteobacteria	NA	NA	NA	NA	ASV379
	368	d__Bacteria	p__Proteobacteria	c__Gammaproteobacteria	NA	NA	NA	NA	ASV380
	369	d__Bacteria	p__Chloroflexota	c__Dehalococcoidia	o__Dehalococcoidales	NA	NA	NA	ASV381
	370	d__Bacteria	p__Desulfobacterota_G_459544	c__JdFR-97	o__JdFR-97	f__JdFR-97	g__JdFR-97	NA	ASV382
	371	d__Bacteria	p__Proteobacteria	c__Gammaproteobacteria	o__Pseudomonadales_641030	f__Halomonadaceae_641030	g__Halomonas_C_640989	s__sulfidaeris	ASV384
	372	d__Bacteria	p__Firmicutes_D	c__Bacilli	o__Bacillales_B_306089	f__Bacillaceae_I	g__Sutcliffiella_A	NA	ASV385
	373	d__Bacteria	p__Acidobacteriota	c__Thermoanaerobaculia	o__Thermoanaerobaculales	NA	NA	NA	ASV387
	374	d__Bacteria	p__Chloroflexota	c__Dehalococcoidia	o__DSTF01	f__WHTK01	g__WHTK01	s__sp009377745	ASV388
	375	d__Bacteria	p__Actinobacteriota	c__Actinomycetia	NA	NA	NA	NA	ASV389
	376	d__Bacteria	p__Proteobacteria	c__Gammaproteobacteria	o__Enterobacterales_A_737866	f__Alteromonadaceae_665222	g__Pseudoalteromonas	s__ruthenica	ASV390
	377	d__Bacteria	p__Chloroflexota	c__Anaerolineae	o__Anaerolineales	NA	NA	NA	ASV391
	378	d__Bacteria	p__Desulfobacterota_I	c__Desulfobacteria	o__Desulfobacterales	f__Desulfosarcinaceae	g__Desulfosarcina	NA	ASV392
	379	d__Archaea	p__Thermoproteota	c__Bathyarchaeia	o__B26-1	f__BA1	g__BA2	s__sp001399795	ASV393
	380	d__Bacteria	p__Proteobacteria	c__Alphaproteobacteria	o__Rhodobacterales	f__Rhodobacteraceae	g__Thioclava_493283	s__Thioclava sediminum	ASV394
	381	d__Bacteria	p__Firmicutes_D	c__Bacilli	NA	NA	NA	NA	ASV395
	382	d__Bacteria	p__Proteobacteria	c__Gammaproteobacteria	o__Tenderiales	f__Tenderiaceae	g__Tenderia	s__electrophaga	ASV396
	383	d__Bacteria	p__Chloroflexota	c__Anaerolineae	NA	NA	NA	NA	ASV397
	384	d__Bacteria	p__Gemmatimonadota	c__Gemmatimonadetes	o__Longimicrobiales	f__UBA6960	g__BD2-11	s__sp002238605	ASV398
	385	d__Bacteria	p__Proteobacteria	c__Gammaproteobacteria	o__Enterobacterales_A_737866	f__Vibrionaceae	g__Vibrio_678715	s__Vibrio rumoiensis	ASV399
	386	d__Bacteria	p__Bacteroidota	c__Bacteroidia	o__Bacteroidales	f__GCA-2748055	g__GCA-2748055	s__sp011056635	ASV400
	387	d__Bacteria	p__Proteobacteria	c__Alphaproteobacteria	o__Kiloniellales	NA	NA	NA	ASV401
	388	d__Bacteria	p__Proteobacteria	c__Gammaproteobacteria	o__Pseudomonadales_641030	f__Halomonadaceae_641030	g__Salinicola	NA	ASV402
	389	d__Bacteria	p__Firmicutes_D	c__Bacilli	o__Bacillales_B_302584	f__Bacillaceae_B_301660	g__Rossellomorea	s__marisflavi	ASV403
	390	d__Bacteria	p__Proteobacteria	c__Alphaproteobacteria	o__Rhizobiales_A_504705	f__Xanthobacteraceae_503485	NA	NA	ASV404
	391	d__Bacteria	p__Firmicutes_D	c__Bacilli	o__Bacillales_D_310495	f__Halobacillaceae	g__Pontibacillus_A	s__marinus	ASV405
	392	d__Bacteria	p__Desulfobacterota_I	c__Syntrophobacteria	o__Syntrophobacterales	NA	NA	NA	ASV406
	393	d__Bacteria	p__Chloroflexota	c__Dehalococcoidia	o__Dehalococcoidales	f__UBA2162	g__MGML01	s__sp001796415	ASV407
	394	d__Archaea	p__Thermoproteota	c__Bathyarchaeia	o__B26-1	f__UBA233	g__PALSA-986	s__sp003589585	ASV408
	395	d__Bacteria	p__Proteobacteria	c__Alphaproteobacteria	o__Rhodobacterales	f__Rhodobacteraceae	g__Muriiphilus_491668	s__Muriiphilus lacisalsi	ASV409
	396	d__Bacteria	p__Gemmatimonadota	c__Gemmatimonadetes	o__Longimicrobiales	f__UBA6960	NA	NA	ASV410
	397	d__Bacteria	p__Proteobacteria	c__Gammaproteobacteria	o__Pseudomonadales_637066	f__Oleiphilaceae_637066	g__Marinobacter_A_637054	NA	ASV411
	398	d__Bacteria	p__Gemmatimonadota	c__Gemmatimonadetes	o__Longimicrobiales	f__UBA6960	g__UBA2982	s__sp009692205	ASV412
	399	d__Bacteria	p__Actinobacteriota	c__Acidimicrobiia_402965	NA	NA	NA	NA	ASV413
	400	d__Bacteria	p__Gemmatimonadota	c__Gemmatimonadetes	o__Longimicrobiales	f__UBA6960	g__UBA2982	NA	ASV414
	401	d__Bacteria	p__Acidobacteriota	c__Thermoanaerobaculia	o__UBA5704	f__UBA5704	NA	NA	ASV415
	402	d__Bacteria	p__Desulfobacterota_I	c__DSM-4660	o__Desulfatiglandales	f__HGW-15	NA	NA	ASV416
	403	d__Bacteria	p__Desulfobacterota_D	c__UBA1144	o__UBA2774	f__UBA2774	g__CR02bin9	NA	ASV417
	404	d__Bacteria	p__Chloroflexota	c__Anaerolineae	o__Anaerolineales	f__UBA4823	g__DSWF01	s__sp011368195	ASV418
	405	d__Bacteria	p__Actinobacteriota	c__Acidimicrobiia_402965	o__UBA5794	f__UBA5794	g__SZUA-442	s__sp003235475	ASV419
	406	d__Bacteria	p__Bacteroidota	c__Ignavibacteria	o__Ignavibacteriales	f__Ignavibacteriaceae_785640	NA	NA	ASV420
	407	d__Bacteria	p__Proteobacteria	c__Alphaproteobacteria	o__Rhizobiales_A_504705	f__Xanthobacteraceae_503485	NA	NA	ASV421
	408	d__Bacteria	p__Desulfobacterota_I	c__DSM-4660	o__Desulfatiglandales	f__HGW-15	g__JAAZBV01	s__sp012513605	ASV422
	409	d__Bacteria	p__Firmicutes_D	c__Bacilli	NA	NA	NA	NA	ASV423
	410	d__Bacteria	p__Desulfobacterota_I	c__Desulfobacteria	o__C00003060	f__C00003060	g__S7086C20	NA	ASV424
	411	d__Bacteria	p__Proteobacteria	c__Gammaproteobacteria	o__Enterobacterales_A_737866	f__Vibrionaceae	g__Vibrio_678715	NA	ASV425
	412	d__Bacteria	p__Proteobacteria	c__Alphaproteobacteria	NA	NA	NA	NA	ASV426
	413	d__Bacteria	p__Myxococcota_A_473307	c__Polyangia_463783	o__Polyangiales	f__SG8-38	g__SG8-38	NA	ASV427
	414	d__Bacteria	p__Proteobacteria	c__Gammaproteobacteria	o__HK1	f__HK1	g__HK1	s__sp000583135	ASV428
	415	d__Bacteria	p__Chloroflexota	c__Dehalococcoidia	o__GIF9	f__AB-539-J10	g__E44-bin10	s__sp004377135	ASV429
	416	d__Bacteria	p__Desulfobacterota_I	c__Desulfobulbia	o__Desulfobulbales	f__Desulfurivibrionaceae	NA	NA	ASV430
	417	d__Bacteria	p__Proteobacteria	c__Alphaproteobacteria	o__Kiloniellales	NA	NA	NA	ASV431
	418	d__Bacteria	p__Gemmatimonadota	c__Gemmatimonadetes	o__Longimicrobiales	f__UBA6960	g__UBA2982	NA	ASV432
	419	d__Bacteria	p__Bacteroidota	c__Bacteroidia	o__Flavobacteriales_877923	f__Flavobacteriaceae	g__Robertkochia	s__marina	ASV433
	420	d__Bacteria	p__Proteobacteria	c__Gammaproteobacteria	o__Pseudomonadales_660879	f__Moraxellaceae	g__Psychrobacter	s__celer	ASV434
	421	d__Bacteria	p__Desulfobacterota_I	c__Desulfobacteria	o__Desulfobacterales	f__UBA11574	g__S5133MH16	s__sp004193595	ASV435
	422	d__Bacteria	p__Chloroflexota	c__Ktedonobacteria	o__Ktedonobacterales	f__Ktedonobacteraceae	g__CF-154	s__sp005879655	ASV436
	423	d__Bacteria	p__Firmicutes_D	c__Bacilli	o__Bacillales_B_302584	f__Bacillaceae_B_301660	g__Rossellomorea	NA	ASV437
	424	d__Bacteria	p__Proteobacteria	c__Gammaproteobacteria	o__Pseudomonadales_637066	f__Oleiphilaceae_637066	g__Marinobacter_A_637054	NA	ASV438
	425	d__Bacteria	p__Firmicutes_D	c__Bacilli	o__Bacillales_B_306089	f__Anoxybacillaceae	g__Geobacillus	s__stearothermophilus	ASV439
	426	d__Bacteria	p__Proteobacteria	c__Gammaproteobacteria	NA	NA	NA	NA	ASV440
	427	d__Bacteria	p__Actinobacteriota	c__Acidimicrobiia_402965	o__UBA5794	f__UBA5794	g__SZUA-442	s__sp003235475	ASV441
	428	d__Bacteria	p__Chloroflexota	c__Anaerolineae	o__B4-G1	f__DUEL01	g__SpSt-77	NA	ASV442
	429	d__Bacteria	p__Gemmatimonadota	c__Gemmatimonadetes	o__KS3-K002	f__JABDQB01	g__JAAXHJ01	s__sp009838765	ASV443
	430	d__Bacteria	p__Chloroflexota	c__Dehalococcoidia	o__GIF9	f__AB-539-J10	NA	NA	ASV444
	431	d__Bacteria	p__Chloroflexota	c__Anaerolineae	NA	NA	NA	NA	ASV445
	432	d__Bacteria	p__Firmicutes_A	c__Clostridia_258483	o__Tissierellales	f__SIT17	g__Senegalia	NA	ASV446
	433	d__Bacteria	p__Proteobacteria	c__Gammaproteobacteria	o__Pseudomonadales_650612	f__Cellvibrionaceae	g__Microbulbifer	s__echini	ASV447
	434	d__Bacteria	p__Desulfobacterota_I	c__Desulfobaccia	o__Desulfobaccales	f__Desulfobaccaceae	g__Desulfobacca	NA	ASV448
	435	d__Bacteria	p__Gemmatimonadota	c__Gemmatimonadetes	o__Longimicrobiales	f__UBA6960	g__UBA2982	NA	ASV449
	436	d__Bacteria	p__Chloroflexota	c__Dehalococcoidia	o__GIF9	f__AB-539-J10	g__E44-bin10	s__sp004377135	ASV450
	437	d__Bacteria	p__Chloroflexota	c__Dehalococcoidia	o__GIF9	f__AB-539-J10	g__E44-bin10	s__sp004377135	ASV451
	438	d__Bacteria	p__Proteobacteria	c__Gammaproteobacteria	NA	NA	NA	NA	ASV452
	439	d__Bacteria	p__Chloroflexota	c__Dehalococcoidia	o__Dehalococcoidales	f__W498	g__W498	NA	ASV453
	440	d__Archaea	p__Thermoproteota	c__Bathyarchaeia	o__B26-1	f__UBA233	g__PALSA-986	s__sp003589585	ASV454
	441	d__Bacteria	p__Chloroflexota	c__Anaerolineae	NA	NA	NA	NA	ASV455
	442	d__Bacteria	p__Chloroflexota	c__Dehalococcoidia	o__Dehalococcoidales	f__W498	g__W498	NA	ASV456
	443	d__Bacteria	p__Proteobacteria	c__Alphaproteobacteria	o__Rhizobiales_A_504705	f__Xanthobacteraceae_503485	NA	NA	ASV457
	444	d__Bacteria	p__Chloroflexota	c__Anaerolineae	o__Anaerolineales	f__Anaerolineaceae_409200	g__Brevefilum	s__sp001508595	ASV458
	445	d__Bacteria	p__Proteobacteria	c__Alphaproteobacteria	NA	NA	NA	NA	ASV459
	446	d__Bacteria	p__Proteobacteria	c__Gammaproteobacteria	o__QQUJ01	f__QQUJ01	g__QQUJ01	NA	ASV460
	447	d__Bacteria	p__Chloroflexota	c__Anaerolineae	NA	NA	NA	NA	ASV461
	448	d__Bacteria	p__Chloroflexota	c__Dehalococcoidia	o__UBA2979	f__UBA2979	NA	NA	ASV462
	449	d__Bacteria	p__Chloroflexota	c__Dehalococcoidia	o__UBA2979	f__UBA2979	NA	NA	ASV463
	450	d__Archaea	p__Asgardarchaeota	c__Lokiarchaeia	o__CR-4	f__SOKP01	g__SDNM01	s__sp004524535	ASV464
	451	d__Bacteria	p__Myxococcota_A_473307	c__Bradymonadia	o__Bradymonadales	f__Bradymonadaceae	g__V1718	NA	ASV465
	452	d__Bacteria	p__Bacteroidota	c__Bacteroidia	o__Bacteroidales	f__VadinHA17_874699	g__DRPN01	NA	ASV466
	453	d__Bacteria	p__Bacteroidota	c__Bacteroidia	NA	NA	NA	NA	ASV467
	454	d__Bacteria	p__Firmicutes_A	c__Clostridia_258483	o__Peptostreptococcales	f__Peptostreptococcaceae_256921	g__Romboutsia_D	NA	ASV468
	455	d__Bacteria	p__Actinobacteriota	c__Actinomycetia	NA	NA	NA	NA	ASV469
	456	d__Bacteria	p__Desulfobacterota_I	c__Desulfobacteria	o__Desulfobacterales	f__SG8-13	g__SG8-13	s__sp001303025	ASV470
	457	d__Bacteria	p__Desulfobacterota_I	c__DSM-4660	o__Desulfatiglandales	NA	NA	NA	ASV471
	458	d__Bacteria	p__Proteobacteria	c__Gammaproteobacteria	NA	NA	NA	NA	ASV472
	459	d__Bacteria	p__Actinobacteriota	c__Actinomycetia	o__Mycobacteriales	f__Mycobacteriaceae	g__Mycobacterium	NA	ASV473
	460	d__Bacteria	p__Proteobacteria	c__Gammaproteobacteria	o__Pseudomonadales_641035	f__Marinomonadaceae	g__Marinomonas	s__ostreistagni	ASV474
	461	d__Bacteria	p__Chloroflexota	c__Dehalococcoidia	o__DSTF01	f__WHTK01	g__WHTK01	s__sp009377745	ASV475
	462	d__Bacteria	p__Gemmatimonadota	c__Gemmatimonadetes	o__Longimicrobiales	f__UBA6960	g__PXFI01	s__sp003564295	ASV476
	463	d__Bacteria	p__Bacteroidota	c__Ignavibacteria	o__Ignavibacteriales	f__Ignavibacteriaceae_785640	g__IGN2	NA	ASV477
	464	d__Bacteria	p__Bacteroidota	c__Ignavibacteria	o__Ignavibacteriales	f__Ignavibacteriaceae_785640	NA	NA	ASV478
	465	d__Archaea	p__Thermoproteota	c__Bathyarchaeia	o__B26-1	f__BA1	g__BA2	s__sp001399795	ASV479
	466	d__Bacteria	p__Proteobacteria	c__Alphaproteobacteria	o__Rhizobiales_A_504721	f__Methyloligellaceae	g__Methyloceanibacter	NA	ASV480
	467	d__Bacteria	p__Proteobacteria	c__Gammaproteobacteria	o__Enterobacterales_A_737866	f__Vibrionaceae	g__Vibrio_678715	s__Vibrio coralliilyticus	ASV481
	468	d__Bacteria	p__Chloroflexota	c__Anaerolineae	o__B4-G1	f__DUEL01	g__SpSt-77	NA	ASV483
	469	d__Bacteria	p__Proteobacteria	c__Gammaproteobacteria	o__Pseudomonadales_641030	f__Halomonadaceae_641030	g__Halomonas_E_640244	s__smyrnensis	ASV484
	470	d__Bacteria	p__Chloroflexota	c__Anaerolineae	o__Promineofilales	f__Promineofilaceae	NA	NA	ASV485
	471	d__Bacteria	p__Proteobacteria	c__Gammaproteobacteria	o__HK1	NA	NA	NA	ASV486
	472	d__Bacteria	p__Proteobacteria	c__Alphaproteobacteria	NA	NA	NA	NA	ASV487
	473	d__Bacteria	p__Proteobacteria	c__Gammaproteobacteria	o__Pseudomonadales_637066	f__Oleiphilaceae_637066	g__Marinobacter_A_637054	NA	ASV488
	474	d__Bacteria	p__Chloroflexota	c__Dehalococcoidia	o__Dehalococcoidales	f__W498	g__W498	NA	ASV490
	475	d__Bacteria	p__Chloroflexota	c__Anaerolineae	o__Anaerolineales	NA	NA	NA	ASV491
	476	d__Archaea	p__Thermoproteota	c__Bathyarchaeia	o__B26-1	f__UBA233	g__PALSA-986	s__sp003589585	ASV492
	477	d__Bacteria	p__Desulfobacterota_I	c__Syntrophobacteria	o__Syntrophobacterales	NA	NA	NA	ASV493
	478	d__Bacteria	p__Proteobacteria	c__Gammaproteobacteria	o__Pseudomonadales_637066	f__Oleiphilaceae_637066	g__Marinobacter_A_637054	NA	ASV494
	479	d__Bacteria	p__Chloroflexota	c__Dehalococcoidia	o__Dehalococcoidales	NA	NA	NA	ASV496
	480	d__Bacteria	p__Campylobacterota	c__Campylobacteria	o__Campylobacterales	f__Sulfurovaceae	g__UBA1140	NA	ASV497
	481	d__Bacteria	p__Firmicutes_A	c__Clostridia_258483	o__Lachnospirales	f__Lachnospiraceae	g__Lachnotalea	NA	ASV498
	482	d__Bacteria	p__Bacteroidota	c__Rhodothermia	o__Balneolales	f__Balneolaceae	g__SW132	s__sp003390325	ASV499
	483	d__Bacteria	p__Atribacterota	c__JS1	o__SB-45	NA	NA	NA	ASV500
	484	d__Bacteria	p__Gemmatimonadota	c__Gemmatimonadetes	o__KS3-K002	f__JABDQB01	g__JAAXHJ01	s__sp009838765	ASV501
	485	d__Bacteria	p__Calditrichota	c__Calditrichia	o__RBG-13-44-9	f__J042	g__J075	NA	ASV502
	486	d__Bacteria	p__Proteobacteria	c__Gammaproteobacteria	o__Burkholderiales_597433	f__SG8-39	g__SCGC-AG-212-J23	s__sp005881595	ASV503
	487	d__Bacteria	p__Chloroflexota	c__Anaerolineae	o__Promineofilales	f__Promineofilaceae	NA	NA	ASV504
	488	d__Bacteria	p__Proteobacteria	c__Gammaproteobacteria	o__Burkholderiales_597433	f__SG8-39	g__SCGC-AG-212-J23	s__sp005881595	ASV505
	489	d__Bacteria	p__Chloroflexota	c__Anaerolineae	o__Anaerolineales	NA	NA	NA	ASV506
	490	d__Bacteria	p__Chloroflexota	c__Anaerolineae	o__Anaerolineales	f__UBA11858	g__B10-G9	NA	ASV507
	491	d__Bacteria	p__Proteobacteria	c__Alphaproteobacteria	NA	NA	NA	NA	ASV509
	492	d__Bacteria	p__Firmicutes_D	c__Bacilli	o__Bacillales_D_310495	f__Halobacillaceae	g__Pontibacillus_A	s__marinus	ASV510
	493	d__Bacteria	p__Actinobacteriota	c__Acidimicrobiia_402965	o__UBA5794	f__UBA5794	g__SZUA-442	s__sp003235475	ASV511
	494	d__Bacteria	p__Proteobacteria	c__Gammaproteobacteria	o__Arenicellales	NA	NA	NA	ASV512
	495	d__Bacteria	p__Calditrichota	c__Calditrichia	o__Calditrichales	f__Calditrichaceae	NA	NA	ASV513
	496	d__Bacteria	p__Proteobacteria	c__Alphaproteobacteria	o__Micropepsales	NA	NA	NA	ASV514
	497	d__Bacteria	p__Myxococcota_A_473307	c__UBA9160	o__UBA9160	NA	NA	NA	ASV515
	498	d__Bacteria	p__Desulfobacterota_D	c__UBA1144	o__UBA2774	f__UBA2774	g__CR02bin9	NA	ASV516
	499	d__Bacteria	p__Proteobacteria	c__Alphaproteobacteria	o__Rhodospirillales_505895	f__Rhodospirillaceae	NA	NA	ASV517
	500	d__Archaea	p__Thermoproteota	c__Bathyarchaeia	o__B26-1	NA	NA	NA	ASV518
	501	d__Bacteria	p__Chloroflexota	c__Anaerolineae	NA	NA	NA	NA	ASV519
	502	d__Bacteria	p__Gemmatimonadota	c__Gemmatimonadetes	o__KS3-K002	f__JABDQB01	g__JAAXHJ01	s__sp009838765	ASV520
	503	d__Bacteria	p__Desulfobacterota_I	NA	NA	NA	NA	NA	ASV521
	504	d__Bacteria	p__Chloroflexota	c__Anaerolineae	o__Anaerolineales	NA	NA	NA	ASV522
	505	d__Bacteria	p__Proteobacteria	c__Gammaproteobacteria	o__Methylococcales	f__Methylothermaceae	NA	NA	ASV523
	506	d__Bacteria	p__Desulfobacterota_B	c__Binatia	o__HRBIN30	f__HRBIN30	g__HRBIN30	s__sp002898795	ASV524
	507	d__Bacteria	p__Planctomycetota	c__Planctomycetia	o__Pirellulales	f__Lacipirellulaceae	g__Pirellulimonas	s__nuda	ASV525
	508	d__Bacteria	p__Actinobacteriota	c__Acidimicrobiia_402965	o__UBA5794	f__UBA5794	g__SZUA-442	s__sp003235475	ASV526
	509	d__Bacteria	p__Krumholzibacteriota	c__Krumholzibacteria	o__LZORAL124-64-63	f__LZORAL124-64-63	g__LZORAL124-64-63	NA	ASV527
	510	d__Bacteria	p__Proteobacteria	c__Gammaproteobacteria	o__XJ16	f__Halofilaceae	g__Halofilum	s__ochraceum	ASV528
	511	d__Bacteria	p__Firmicutes_D	c__Bacilli	o__Bacillales_B_306089	f__Bacillaceae_H_294103	g__Metabacillus_B_289979	s__sp002871465	ASV529
	512	d__Bacteria	p__Spirochaetota	c__Spirochaetia	o__DSM-27196	f__SKKC01	g__SKKC01	NA	ASV530
	513	d__Archaea	p__Thermoproteota	c__Bathyarchaeia	o__B26-1	f__BA1	g__BA2	s__sp001399795	ASV531
	514	d__Bacteria	p__Chloroflexota	c__Limnocylindria	o__QHBO01	f__QHBO01	g__CF-167	s__sp005879775	ASV532
	515	d__Bacteria	p__Calditrichota	c__Calditrichia	o__RBG-13-44-9	f__J042	g__J075	NA	ASV533
	516	d__Bacteria	p__Proteobacteria	c__Gammaproteobacteria	o__Pseudomonadales_641030	f__Halomonadaceae_641030	g__Halomonas_C_640989	NA	ASV534
	517	d__Bacteria	p__Firmicutes_F	c__Halanaerobiia	o__Halanaerobiales	f__Halanaerobiaceae_43036	g__Halocella_43036	s__Halocella cellulosilytica	ASV535
	518	d__Bacteria	p__Proteobacteria	c__Gammaproteobacteria	o__QQUJ01	f__QQUJ01	g__QQUJ01	NA	ASV536
	519	d__Bacteria	p__Acidobacteriota	c__Acidobacteriae	o__UBA7540	f__UBA7540	g__SCRD01	s__sp004298155	ASV537
	520	d__Bacteria	p__Bacteroidota	c__Bacteroidia	o__Flavobacteriales_877923	f__Flavobacteriaceae	NA	NA	ASV538
	521	d__Bacteria	p__Firmicutes_D	c__Bacilli	o__Haloplasmatales_A	f__Haloplasmataceae	g__Haloplasma	s__contractile	ASV539
	522	d__Bacteria	p__Proteobacteria	c__Gammaproteobacteria	NA	NA	NA	NA	ASV540
	523	d__Bacteria	p__Chloroflexota	c__Anaerolineae	o__Anaerolineales	f__EnvOPS12	g__UBA12294	s__sp002050275	ASV541
	524	d__Bacteria	p__Proteobacteria	c__Gammaproteobacteria	o__Pseudomonadales_641035	f__Nitrincolaceae	g__Marinobacterium_A_637622	s__mangrovicola	ASV542
	525	d__Bacteria	p__Actinobacteriota	c__Acidimicrobiia_402965	o__UBA5794	f__UBA5794	g__SZUA-442	s__sp003235475	ASV543
	526	d__Bacteria	p__Proteobacteria	c__Alphaproteobacteria	o__Rhizobiales_A_504721	f__Hyphomicrobiaceae	NA	NA	ASV544
	527	d__Bacteria	p__Proteobacteria	c__Alphaproteobacteria	o__Rhizobiales_A_504721	f__Methyloligellaceae	g__UBA2767	s__sp002897995	ASV545
	528	d__Bacteria	p__Desulfobacterota_I	c__QYQD01	o__QYQD01	f__QYQD01	g__QYQD01	s__sp011046395	ASV546
	529	d__Archaea	p__Thermoproteota	c__Bathyarchaeia	o__B26-1	f__BA1	g__BA2	s__sp001399795	ASV547
	530	d__Bacteria	p__Bacteroidota	c__Bacteroidia	o__Bacteroidales	f__GCA-2748055	g__GCA-2748055	NA	ASV549
	531	d__Bacteria	p__Bacteroidota	c__Bacteroidia	o__Flavobacteriales_877923	f__Flavobacteriaceae	g__Leeuwenhoekiella	s__palythoae	ASV550
	532	d__Bacteria	p__Calditrichota	c__Calditrichia	o__Calditrichales	f__Calditrichaceae	NA	NA	ASV551
	533	d__Bacteria	p__Desulfobacterota_I	c__Desulfobacteria	o__Desulfobacterales	f__UBA11574	g__S5133MH16	s__sp004193595	ASV552
	534	d__Bacteria	p__Chloroflexota	c__Dehalococcoidia	o__Tepidiformales	f__Tepidiformaceae	g__Tepidiforma	s__bonchosmolovskayae	ASV553
	535	d__Bacteria	p__Calditrichota	c__Calditrichia	o__RBG-13-44-9	f__J042	g__J075	NA	ASV554
	536	d__Bacteria	p__Eisenbacteria	c__RBG-16-71-46	o__RBG-16-71-46	f__RBG-16-71-46	g__DSQF01	s__sp011357805	ASV555
	537	d__Bacteria	p__Desulfobacterota_I	c__DSM-4660	o__Desulfatiglandales	NA	NA	NA	ASV556
	538	d__Bacteria	p__Proteobacteria	c__Gammaproteobacteria	o__Enterobacterales_A_737866	f__Alteromonadaceae_665222	g__Alteromonas_F	s__iocasae	ASV557
	539	d__Bacteria	p__Gemmatimonadota	c__Gemmatimonadetes	o__Longimicrobiales	f__UBA6960	NA	NA	ASV558
	540	d__Bacteria	p__Bacteroidota	c__Ignavibacteria	o__Ignavibacteriales	f__Ignavibacteriaceae_785640	g__IGN2	NA	ASV559
	541	d__Bacteria	p__Planctomycetota	c__Phycisphaerae	o__UBA1845	f__UBA1845	NA	NA	ASV560
	542	d__Bacteria	p__Bacteroidota	c__Bacteroidia	o__Bacteroidales	f__GCA-2748055	g__GCA-2748055	s__sp011056635	ASV561
	543	d__Bacteria	p__Actinobacteriota	c__Acidimicrobiia_402965	o__UBA5794	f__UBA5794	g__SZUA-442	s__sp003235475	ASV562
	544	d__Bacteria	p__Calditrichota	c__Calditrichia	o__RBG-13-44-9	f__J042	g__J075	NA	ASV563
	545	d__Bacteria	p__Spirochaetota	c__Spirochaetia	o__SZUA-6	f__Bin103	g__Bin103	s__sp002238925	ASV564
	546	d__Archaea	p__Thermoproteota	c__Bathyarchaeia	o__B26-1	f__BA1	g__BA2	s__sp001399795	ASV565
	547	d__Bacteria	p__Proteobacteria	c__Gammaproteobacteria	o__Pseudomonadales_637066	f__Oleiphilaceae_637066	g__Marinobacter_A_636597	s__bohaiensis	ASV566
	548	d__Bacteria	p__Chloroflexota	c__Dehalococcoidia	o__GIF9	f__AB-539-J10	NA	NA	ASV567
	549	d__Bacteria	p__Proteobacteria	c__Alphaproteobacteria	o__Rhizobiales_A_504721	f__Methyloligellaceae	g__Methyloceanibacter	NA	ASV568
	550	d__Bacteria	p__Bacteroidota	c__Bacteroidia	o__Chitinophagales	f__Saprospiraceae	NA	NA	ASV569
	551	d__Archaea	p__Thermoproteota	c__Bathyarchaeia	o__B26-1	f__UBA233	g__PALSA-986	NA	ASV570
	552	d__Archaea	p__Thermoproteota	c__Bathyarchaeia	o__B26-1	f__SOJC01	g__SOJC01	s__sp004376645	ASV571
	553	d__Bacteria	p__Myxococcota_A_473307	c__UBA9160	o__UBA9160	f__PR03	g__CAADGG01	NA	ASV572
	554	d__Bacteria	p__Proteobacteria	c__Gammaproteobacteria	o__UBA4486	f__UBA4486	NA	NA	ASV573
	555	d__Bacteria	p__Gemmatimonadota	c__Gemmatimonadetes	o__Longimicrobiales	f__UBA6960	NA	NA	ASV574
	556	d__Bacteria	p__Firmicutes_D	c__Bacilli	o__Lactobacillales	f__Streptococcaceae	g__Lactococcus_A_343306	s__carnosus	ASV575
	557	d__Archaea	p__Thermoproteota	c__Bathyarchaeia	o__B26-1	f__UBA233	g__DSLH01	s__sp011053435	ASV576
	558	d__Bacteria	p__Zixibacteria	c__MSB-5A5_778960	o__JAABVY01	f__JAABVY01	g__JAABVY01	NA	ASV577
	559	d__Bacteria	p__Proteobacteria	c__Gammaproteobacteria	NA	NA	NA	NA	ASV580
	560	d__Bacteria	p__Firmicutes_D	c__Bacilli	o__Bacillales_D_310495	f__Halobacillaceae	g__Thalassobacillus	s__hwangdonensis	ASV581
	561	d__Bacteria	p__Acidobacteriota	c__Aminicenantia	o__Aminicenantales	f__Aminicenantaceae	NA	NA	ASV583
	562	d__Bacteria	p__Proteobacteria	c__Gammaproteobacteria	NA	NA	NA	NA	ASV584
	563	d__Bacteria	p__Desulfobacterota_D	c__UBA1144	o__UBA2774	f__CSP1-2	g__HRBIN37	s__sp002898375	ASV585
	564	d__Bacteria	p__Firmicutes_D	c__Bacilli	o__Bacillales_D_310495	f__Halobacillaceae	g__Pontibacillus_A	s__yanchengensis	ASV586
	565	d__Bacteria	p__Chloroflexota	c__Anaerolineae	NA	NA	NA	NA	ASV587
	566	d__Bacteria	p__Proteobacteria	c__Alphaproteobacteria	o__Rhizobiales_A_504721	f__Methyloligellaceae	g__Methyloceanibacter	NA	ASV589
	567	d__Bacteria	p__Proteobacteria	c__Gammaproteobacteria	o__GCA-2729495	f__GCA-2729495	g__GCA-002729875	s__sp002688175	ASV590
	568	d__Bacteria	p__Proteobacteria	c__Alphaproteobacteria	o__Rhizobiales_A_504721	f__Methyloligellaceae	g__Methyloceanibacter	NA	ASV591
	569	d__Bacteria	p__Proteobacteria	c__Alphaproteobacteria	o__Rhodospirillales_508122	f__HT1-32	g__HT1-32	NA	ASV594
	570	d__Bacteria	p__Desulfobacterota_I	c__DSM-4660	o__Desulfatiglandales	f__HGW-15	NA	NA	ASV595
	571	d__Bacteria	p__Spirochaetota	c__Spirochaetia	o__SZUA-6	f__Bin103	g__Bin103	s__sp002238925	ASV597
	572	d__Bacteria	p__Proteobacteria	c__Gammaproteobacteria	o__Acidiferrobacterales	NA	NA	NA	ASV598
	573	d__Bacteria	p__Chloroflexota	c__Anaerolineae	o__Anaerolineales	f__UBA4823	g__NAK19	s__sp003327455	ASV599
	574	d__Bacteria	p__Proteobacteria	c__Gammaproteobacteria	NA	NA	NA	NA	ASV600
	575	d__Archaea	p__Thermoproteota	c__Bathyarchaeia	o__B26-1	f__SOJC01	g__SOJC01	s__sp004376645	ASV601
	576	d__Bacteria	p__Proteobacteria	c__Gammaproteobacteria	o__Methylococcales	f__Methylothermaceae	NA	NA	ASV602
	577	d__Bacteria	p__Firmicutes_D	c__Bacilli	o__Bacillales_B_302584	f__Bacillaceae_B_301660	g__Bacillus_BM	s__salacetis	ASV603
	578	d__Bacteria	p__Actinobacteriota	c__Acidimicrobiia_402965	o__UBA5794	f__UBA5794	g__SZUA-442	s__sp003235475	ASV604
	579	d__Bacteria	p__Proteobacteria	c__Gammaproteobacteria	o__Enterobacterales_A_737866	f__Vibrionaceae	g__Vibrio_678715	s__Vibrio alginolyticus_674045	ASV605
	580	d__Bacteria	p__Bacteroidota	c__Bacteroidia	o__Bacteroidales	f__VadinHA17_874699	g__HyVt-105	NA	ASV606
	581	d__Bacteria	p__Actinobacteriota	c__Acidimicrobiia_402965	o__UBA5794	f__UBA5794	g__SZUA-442	s__sp003235475	ASV607
	582	d__Bacteria	p__Proteobacteria	c__Gammaproteobacteria	o__Enterobacterales_A_737866	f__Alteromonadaceae_665222	g__Pseudoalteromonas	s__sp002684115	ASV610
	583	d__Bacteria	p__Gemmatimonadota	c__Gemmatimonadetes	o__Gemmatimonadales	f__GWC2-71-9	g__HRBIN33	s__sp002923375	ASV611
	584	d__Bacteria	p__Gemmatimonadota	c__Gemmatimonadetes	o__KS3-K002	f__JABDQB01	g__JAAXHJ01	s__sp009838765	ASV613
	585	d__Bacteria	p__Proteobacteria	c__Gammaproteobacteria	o__QQUJ01	f__QQUJ01	g__QQUJ01	NA	ASV614
	586	d__Bacteria	p__Proteobacteria	c__Gammaproteobacteria	o__Enterobacterales_A_737866	f__Vibrionaceae	g__Vibrio_678715	s__Vibrio mytili	ASV615
	587	d__Bacteria	p__Proteobacteria	c__Gammaproteobacteria	o__GCA-2729495	f__GCA-2729495	g__GCA-002729875	s__sp002688175	ASV616
	588	d__Bacteria	p__Chloroflexota	c__Dehalococcoidia	o__SM23-28-2	f__RBG-16-64-32	g__CF-163	s__sp005882715	ASV617
	589	d__Bacteria	p__Myxococcota_A_473307	c__UBA9160	o__UBA9160	f__PR03	g__CAADGG01	NA	ASV618
	590	d__Bacteria	p__Desulfobacterota_I	c__Desulfobaccia	o__Desulfobaccales	f__Desulfobaccaceae	g__Desulfobacca	NA	ASV619
	591	d__Bacteria	p__Chloroflexota	c__Limnocylindria	o__Limnocylindrales	f__CSP1-4	g__GWC2-73-18	NA	ASV620
	592	d__Bacteria	p__Krumholzibacteriota	c__Krumholzibacteria	o__LZORAL124-64-63	f__LZORAL124-64-63	NA	NA	ASV621
	593	d__Bacteria	p__Myxococcota_A_473307	c__UBA9160	o__UBA9160	NA	NA	NA	ASV622
	594	d__Archaea	p__Thermoproteota	c__Bathyarchaeia	o__B26-1	f__BA1	g__BA2	s__sp001399795	ASV623
	595	d__Bacteria	p__Gemmatimonadota	c__Gemmatimonadetes	o__Longimicrobiales	f__UBA6960	g__PXFI01	s__sp003564295	ASV624
	596	d__Bacteria	p__Nitrospirota_A_437815	c__Thermodesulfovibrionia	o__UBA6902	f__UBA6902	g__BMS3ABIN06	s__sp002897895	ASV625
	597	d__Bacteria	p__Chloroflexota	c__Anaerolineae	o__Anaerolineales	f__Anaerolineaceae_409200	g__Brevefilum	s__sp001508595	ASV626
	598	d__Bacteria	p__Firmicutes_D	c__Bacilli	o__Bacillales_D_310495	f__Halobacillaceae	g__Pontibacillus_A	s__yanchengensis	ASV627
	599	d__Archaea	p__Asgardarchaeota	c__Thorarchaeia	o__Thorarchaeales	f__Thorarchaeaceae	NA	NA	ASV628
	600	d__Archaea	p__Thermoproteota	c__Bathyarchaeia	o__B26-1	f__BA1	g__BA2	s__sp001399795	ASV629
	601	d__Archaea	p__Thermoproteota	c__Bathyarchaeia	o__B26-1	f__BA1	g__BA2	s__sp001399795	ASV630
	602	d__Bacteria	p__Zixibacteria	c__MSB-5A5_778960	o__JAABVY01	f__JAABVY01	g__JAABVY01	s__sp011056555	ASV631
	603	d__Bacteria	p__Proteobacteria	c__Gammaproteobacteria	o__Chromatiales_598058	f__Thioprofundaceae	NA	NA	ASV632
	604	d__Bacteria	p__Chloroflexota	c__Anaerolineae	o__Anaerolineales	NA	NA	NA	ASV633
	605	d__Bacteria	p__Firmicutes_D	c__Bacilli	o__Paenibacillales	f__Paenibacillaceae_367444	g__Paenibacillus_J_366884	s__campinasensis	ASV634
	606	d__Bacteria	p__Desulfobacterota_I	c__Desulfobacteria	o__Desulfobacterales	NA	NA	NA	ASV635
	607	d__Bacteria	p__Actinobacteriota	c__Humimicrobiia	o__Humimicrobiales	f__Humimicrobiaceae	g__Halolacustris	NA	ASV638
	608	d__Bacteria	p__Acidobacteriota	c__Vicinamibacteria	o__Fen-336	f__Fen-336	g__WYBL01	s__sp011526565	ASV639
	609	d__Bacteria	p__Proteobacteria	c__Gammaproteobacteria	o__Pseudomonadales_641030	f__Halomonadaceae_641030	g__Halomonas_E_640244	s__koreensis	ASV640
	610	d__Bacteria	p__Proteobacteria	c__Gammaproteobacteria	o__Enterobacterales_A_737866	f__Vibrionaceae	g__Vibrio_678715	s__Vibrio coralliilyticus	ASV641
	611	d__Bacteria	p__Proteobacteria	c__Gammaproteobacteria	o__VBWC01	f__VBWC01	g__VBWC01	s__sp006218035	ASV642
	612	d__Bacteria	p__Desulfobacterota_I	c__DSM-4660	o__Desulfatiglandales	f__Desulfatiglandaceae	g__B111-G9	s__sp011042035	ASV643
	613	d__Bacteria	p__Firmicutes_A	c__Clostridia_258483	o__Peptostreptococcales	f__Peptostreptococcaceae_256921	g__Tepidibacter_A	s__mesophilus	ASV644
	614	d__Bacteria	p__Chloroflexota	c__Anaerolineae	o__Ardenticatenales	f__Ardenticatenaceae	g__Ardenticatena	NA	ASV645
	615	d__Bacteria	p__Chloroflexota	c__Dehalococcoidia	o__GIF9	f__AB-539-J10	g__E44-bin10	s__sp004377135	ASV646
	616	d__Bacteria	p__Proteobacteria	c__Alphaproteobacteria	NA	NA	NA	NA	ASV647
	617	d__Bacteria	p__Actinobacteriota	c__Actinomycetia	o__Propionibacteriales	f__Nocardioidaceae	g__Nocardioides_A_392796	NA	ASV648
	618	d__Bacteria	p__Chloroflexota	c__Dehalococcoidia	o__UBA2979	f__UBA2979	g__VXMT01	s__sp009840945	ASV649
	619	d__Archaea	p__Asgardarchaeota	c__Lokiarchaeia	o__CR-4	f__SOKP01	g__SDNM01	s__sp004524535	ASV650
	620	d__Bacteria	p__Proteobacteria	c__Gammaproteobacteria	o__Pseudomonadales_660954	f__HTCC2089_660954	NA	NA	ASV651
	621	d__Bacteria	p__Gemmatimonadota	c__Gemmatimonadetes	o__Longimicrobiales	f__RSA9	g__RSA9	s__sp003242735	ASV652
	622	d__Bacteria	p__Proteobacteria	c__Gammaproteobacteria	o__Tenderiales	f__Tenderiaceae	g__Tenderia	s__electrophaga	ASV653
	623	d__Archaea	p__Thermoproteota	c__Bathyarchaeia	o__B26-1	f__BA1	g__BA2	s__sp001399795	ASV654
	624	d__Bacteria	p__Desulfobacterota_I	c__DSM-4660	o__Desulfatiglandales	f__Desulfatiglandaceae	g__UBA5623	NA	ASV655
	625	d__Bacteria	p__Proteobacteria	c__Gammaproteobacteria	NA	NA	NA	NA	ASV656
	626	d__Bacteria	p__Proteobacteria	c__Gammaproteobacteria	o__Enterobacterales_A_737866	f__Vibrionaceae	g__Vibrio_678715	s__Vibrio mytili	ASV658
	627	d__Bacteria	p__Proteobacteria	c__Gammaproteobacteria	o__Thiomicrospirales	f__Thiomicrospiraceae	NA	NA	ASV659
	628	d__Bacteria	p__Desulfobacterota_I	c__DSM-4660	o__Desulfatiglandales	f__Desulfatiglandaceae	g__UBA5623	NA	ASV660
	629	d__Bacteria	p__Firmicutes_F	c__Halanaerobiia	o__Halanaerobiales	f__Halanaerobiaceae_43036	g__Halocella_43036	s__Halocella cellulosilytica	ASV661
	630	d__Bacteria	p__Bacteroidota	c__Bacteroidia	o__Flavobacteriales_877923	f__Flavobacteriaceae	g__Zunongwangia	s__mangrovi	ASV662
	631	d__Bacteria	p__Proteobacteria	c__Gammaproteobacteria	o__Enterobacterales_A_737866	f__Vibrionaceae	g__Vibrio_678715	NA	ASV663
	632	d__Bacteria	p__Acidobacteriota	c__UBA6911	o__UBA6911	f__UBA6911	g__Gp18-AA60	NA	ASV664
	633	d__Bacteria	p__Chloroflexota	c__Dehalococcoidia	o__Dehalococcoidales	NA	NA	NA	ASV665
	634	d__Bacteria	p__Acidobacteriota	c__Aminicenantia	o__Aminicenantales	f__Aminicenantaceae	g__SOIV01	s__sp011049545	ASV666
	635	d__Bacteria	p__Chloroflexota	c__Dehalococcoidia	o__Dehalococcoidales	f__W498	g__W498	NA	ASV667
	636	d__Bacteria	p__Planctomycetota	c__Planctomycetia	o__Planctomycetales	f__Planctomycetaceae	NA	NA	ASV668
	637	d__Bacteria	p__Bacteroidota	c__Bacteroidia	o__Bacteroidales	f__Marinilabiliaceae	g__JC017	s__sp004296775	ASV669
	638	d__Bacteria	p__Proteobacteria	c__Gammaproteobacteria	o__Pseudomonadales_660879	f__Moraxellaceae	g__Psychrobacter	s__sp001435295	ASV670
	639	d__Bacteria	p__Chloroflexota	c__Ktedonobacteria	o__Ktedonobacterales	f__Ktedonobacteraceae	g__CF-154	s__sp005879655	ASV671
	640	d__Bacteria	p__Myxococcota_A_473307	c__Polyangia_463783	o__Polyangiales	f__SG8-38	g__SG8-38	NA	ASV673
	641	d__Bacteria	p__Chloroflexota	c__Anaerolineae	o__Anaerolineales	f__EnvOPS12	NA	NA	ASV676
	642	d__Bacteria	p__Chloroflexota	c__Anaerolineae	o__B4-G1	f__DUEL01	g__SpSt-77	NA	ASV677
	643	d__Bacteria	p__Spirochaetota	c__Spirochaetia	o__SZUA-6	f__Bin103	g__Bin103	s__sp002238925	ASV678
	644	d__Bacteria	p__Proteobacteria	c__Alphaproteobacteria	NA	NA	NA	NA	ASV679
	645	d__Bacteria	p__Calditrichota	c__Calditrichia	o__RBG-13-44-9	f__J042	g__J075	NA	ASV680
	646	d__Bacteria	p__Acidobacteriota	c__Vicinamibacteria	o__Fen-336	f__Fen-336	g__WYBL01	s__sp011526565	ASV681
	647	d__Bacteria	p__Bacteroidota	c__Bacteroidia	o__Chitinophagales	f__Saprospiraceae	NA	NA	ASV683
	648	d__Bacteria	p__Desulfobacterota_I	c__Desulfobacteria	o__Desulfobacterales	f__SG8-13	g__SG8-13	s__sp001303025	ASV685
	649	d__Bacteria	p__Chloroflexota	c__Limnocylindria	o__Limnocylindrales	f__CSP1-4	g__GWC2-73-18	NA	ASV686
	650	d__Bacteria	p__Proteobacteria	c__Alphaproteobacteria	o__Rhodobacterales	f__Rhodobacteraceae	NA	NA	ASV687
	651	d__Bacteria	p__Proteobacteria	c__Gammaproteobacteria	o__Thiomicrospirales	f__Thiomicrospiraceae	g__Hydrogenovibrio	s__thermophilus	ASV688
	652	d__Bacteria	p__Proteobacteria	c__Gammaproteobacteria	o__Enterobacterales_A_737866	f__Vibrionaceae	g__Vibrio_678715	s__Vibrio rumoiensis	ASV689
	653	d__Bacteria	p__Proteobacteria	c__Gammaproteobacteria	o__Chromatiales_602660	f__Chromatiaceae_602660	g__Halochromatium	s__roseum	ASV690
	654	d__Bacteria	p__Atribacterota	c__JS1	o__SB-45	NA	NA	NA	ASV691
	655	d__Bacteria	p__Firmicutes_D	c__Bacilli	o__Bacillales_D_310495	f__Halobacillaceae	g__Pontibacillus_A	s__salipaludis	ASV692
	656	d__Bacteria	p__Actinobacteriota	c__Acidimicrobiia_402965	o__UBA5794	f__UBA5794	g__SZUA-442	s__sp003235475	ASV693
	657	d__Bacteria	p__Proteobacteria	c__Alphaproteobacteria	o__Rhodospirillales_505895	NA	NA	NA	ASV694
	658	d__Bacteria	p__Proteobacteria	c__Alphaproteobacteria	o__Micavibrionales	f__Micavibrionaceae	g__TMED27	s__sp002167715	ASV695
	659	d__Bacteria	p__Proteobacteria	c__Gammaproteobacteria	o__Pseudomonadales_660879	f__Moraxellaceae	g__Psychrobacter	NA	ASV697
	660	d__Bacteria	p__Proteobacteria	c__Gammaproteobacteria	o__Enterobacterales_A_737866	f__Vibrionaceae	g__Vibrio_678715	s__Vibrio mytili	ASV698
	661	d__Bacteria	p__Desulfobacterota_I	c__Desulfobacteria	o__Desulfobacterales	f__Desulfosarcinaceae	g__Desulfosarcina	s__cetonica	ASV699
	662	d__Bacteria	p__Proteobacteria	c__Alphaproteobacteria	NA	NA	NA	NA	ASV700
	663	d__Bacteria	p__Actinobacteriota	c__Actinomycetia	o__Mycobacteriales	f__Mycobacteriaceae	g__Mycobacterium	NA	ASV702
	664	d__Bacteria	p__Proteobacteria	c__Gammaproteobacteria	o__Pseudomonadales_641035	f__Marinomonadaceae	g__Marinomonas	s__ostreistagni	ASV703
	665	d__Bacteria	p__Acidobacteriota	c__Thermoanaerobaculia	o__Thermoanaerobaculales	NA	NA	NA	ASV704
	666	d__Bacteria	p__Planctomycetota	c__Planctomycetia	o__Pirellulales	f__Lacipirellulaceae	g__Pirellulimonas	s__nuda	ASV705
	667	d__Bacteria	p__Proteobacteria	c__Gammaproteobacteria	o__HK1	f__HK1	g__HK1	s__sp000583135	ASV706
	668	d__Bacteria	p__Desulfobacterota_I	c__Desulfobacteria	o__C00003060	f__C00003060	g__S7086C20	NA	ASV707
	669	d__Bacteria	p__Acidobacteriota	c__Acidobacteriae	o__UBA7540	f__UBA7540	g__SCRD01	s__sp004298155	ASV708
	670	d__Bacteria	p__Chloroflexota	c__Anaerolineae	NA	NA	NA	NA	ASV709
	671	d__Bacteria	p__Planctomycetota	c__Phycisphaerae	o__Phycisphaerales	f__SM1A02	NA	NA	ASV710
	672	d__Bacteria	p__Proteobacteria	c__Alphaproteobacteria	NA	NA	NA	NA	ASV711
	673	d__Bacteria	p__Krumholzibacteriota	c__Krumholzibacteria	o__LZORAL124-64-63	f__LZORAL124-64-63	g__LZORAL124-64-63	s__sp002747875	ASV712
	674	d__Bacteria	p__Actinobacteriota	c__Acidimicrobiia_402965	o__UBA5794	f__UBA5794	g__SZUA-442	s__sp003235475	ASV713
	675	d__Bacteria	p__Desulfobacterota_I	c__Syntrophobacteria	o__Syntrophobacterales	NA	NA	NA	ASV714
	676	d__Bacteria	p__Planctomycetota	c__Phycisphaerae	o__Phycisphaerales	f__SM1A02	NA	NA	ASV715
	677	d__Bacteria	p__Desulfobacterota_I	c__Desulfobacteria	o__Desulfobacterales	f__SG8-13	g__SG8-13	s__sp001303025	ASV716
	678	d__Archaea	p__Thermoplasmatota	c__E2	o__DHVEG-1	f__DHVEG-1	g__SM1-50	s__sp002496355	ASV717
	679	d__Bacteria	p__Bacteroidota	c__Bacteroidia	o__Bacteroidales	f__GCA-2748055	g__GCA-2748055	NA	ASV718
	680	d__Bacteria	p__Desulfobacterota_I	c__DSM-4660	o__Desulfatiglandales	f__Desulfatiglandaceae	g__UBA5623	NA	ASV719
	681	d__Bacteria	p__Myxococcota_A_473307	c__Polyangia_463783	o__Nannocystales	f__Nannocystaceae	NA	NA	ASV720
	682	d__Bacteria	p__Gemmatimonadota	c__Gemmatimonadetes	o__Longimicrobiales	f__UBA6960	NA	NA	ASV721
	683	d__Bacteria	p__Desulfobacterota_I	c__Syntrophobacteria	o__Syntrophobacterales	NA	NA	NA	ASV722
	684	d__Bacteria	p__Campylobacterota	c__Campylobacteria	o__Campylobacterales	f__Sulfurovaceae	g__UBA1140	NA	ASV723
	685	d__Bacteria	p__Bacteroidota	c__Bacteroidia	o__Flavobacteriales_877923	f__Flavobacteriaceae	g__Leeuwenhoekiella	s__palythoae	ASV724
	686	d__Archaea	p__Thermoproteota	c__Bathyarchaeia	o__B26-1	NA	NA	NA	ASV725
	687	d__Bacteria	p__Chloroflexota	c__Dehalococcoidia	o__Dehalococcoidales	NA	NA	NA	ASV726
	688	d__Bacteria	p__Chloroflexota	c__Dehalococcoidia	o__Dehalococcoidales	f__W498	g__W498	s__sp011170285	ASV727
	689	d__Bacteria	p__Chloroflexota	c__Anaerolineae	NA	NA	NA	NA	ASV728
	690	d__Bacteria	p__Proteobacteria	c__Gammaproteobacteria	o__UBA6429	f__UBA6429	g__Thiohalophilus	s__thiocyanatoxydans	ASV729
	691	d__Bacteria	p__Chloroflexota	c__Ktedonobacteria	o__Ktedonobacterales	f__Ktedonobacteraceae	g__CF-154	s__sp005879655	ASV730
	692	d__Bacteria	p__Actinobacteriota	NA	NA	NA	NA	NA	ASV731
	693	d__Bacteria	p__Proteobacteria	c__Gammaproteobacteria	o__Pseudomonadales_650612	f__Cellvibrionaceae	g__Microbulbifer	s__celer	ASV733
	694	d__Archaea	p__Thermoproteota	c__Bathyarchaeia	o__B26-1	f__UBA233	g__PALSA-986	s__sp003589585	ASV734
	695	d__Bacteria	p__Calditrichota	c__Calditrichia	o__Calditrichales	f__Calditrichaceae	NA	NA	ASV735
	696	d__Bacteria	p__Spirochaetota	c__Spirochaetia	NA	NA	NA	NA	ASV736
	697	d__Bacteria	p__Proteobacteria	c__Alphaproteobacteria	NA	NA	NA	NA	ASV738
	698	d__Bacteria	p__Acidobacteriota	c__UBA6911	o__UBA6911	f__UBA6911	g__Gp18-AA60	s__sp003225335	ASV739
	699	d__Archaea	p__Thermoproteota	c__Bathyarchaeia	o__B26-1	f__SOJC01	g__SOJC01	s__sp004376645	ASV740
	700	d__Bacteria	p__Chloroflexota	c__Anaerolineae	NA	NA	NA	NA	ASV741
	701	d__Bacteria	p__Actinobacteriota	c__Acidimicrobiia_402965	o__UBA5794	f__UBA5794	g__SZUA-442	s__sp003235475	ASV742
	702	d__Bacteria	p__Planctomycetota	c__Phycisphaerae	o__UBA1845	f__PWPN01	g__JAAYDF01	NA	ASV743
	703	d__Bacteria	p__Proteobacteria	c__Gammaproteobacteria	o__QQUJ01	f__QQUJ01	g__QQUJ01	NA	ASV744
	704	d__Bacteria	p__Desulfobacterota_I	c__DSM-4660	o__Desulfatiglandales	f__Desulfatiglandaceae	g__B111-G9	s__sp011042035	ASV745
	705	d__Archaea	p__Thermoproteota	c__Bathyarchaeia	o__B26-1	NA	NA	NA	ASV746
	706	d__Bacteria	p__Bacteroidota	c__Bacteroidia	o__Bacteroidales	f__UBA10428	g__JAAAOM01	NA	ASV747
	707	d__Bacteria	p__Chloroflexota	c__Anaerolineae	NA	NA	NA	NA	ASV748
	708	d__Bacteria	p__Proteobacteria	c__Gammaproteobacteria	o__Enterobacterales_A_737866	f__Vibrionaceae	g__Vibrio_678715	s__Vibrio mytili	ASV749
	709	d__Bacteria	p__Proteobacteria	c__Gammaproteobacteria	o__Enterobacterales_A_737866	f__Vibrionaceae	g__Vibrio_678715	NA	ASV750
	710	d__Bacteria	p__Proteobacteria	c__Gammaproteobacteria	o__Enterobacterales_A_737866	f__Vibrionaceae	g__Vibrio_678715	NA	ASV751
	711	d__Bacteria	p__Proteobacteria	c__Gammaproteobacteria	o__DSM-19610	f__DSM-19610	g__Thiogranum	NA	ASV752
	712	d__Bacteria	p__Proteobacteria	c__Gammaproteobacteria	o__Xanthomonadales_613062	f__Rhodanobacteraceae_613062	NA	NA	ASV753
	713	d__Bacteria	p__Proteobacteria	c__Alphaproteobacteria	NA	NA	NA	NA	ASV754
	714	d__Bacteria	p__Chloroflexota	c__Dehalococcoidia	o__DSTF01	f__WHTK01	g__WHTK01	s__sp009377745	ASV755
	715	d__Bacteria	p__Firmicutes_A	c__Clostridia_258483	o__Clostridiales	f__Clostridiaceae_222000	g__Clostridium_AF	s__ganghwense	ASV756
	716	d__Bacteria	p__Bacteroidota	c__Rhodothermia	o__Balneolales	f__Balneolaceae	NA	NA	ASV757
	717	d__Bacteria	p__Gemmatimonadota	c__Gemmatimonadetes	o__KS3-K002	f__JABDQB01	g__JAAXHJ01	s__sp009838765	ASV758
	718	d__Bacteria	p__Desulfobacterota_I	c__DSM-4660	o__Desulfatiglandales	f__Desulfatiglandaceae	g__UBA5623	NA	ASV759
	719	d__Archaea	p__Thermoplasmatota	c__E2	o__DHVEG-1	f__DHVEG-1	g__SM1-50	s__sp002496355	ASV760
	720	d__Bacteria	p__Gemmatimonadota	c__Gemmatimonadetes	o__KS3-K002	f__JABDQB01	g__JAAXHJ01	s__sp009838765	ASV761
	721	d__Bacteria	p__Desulfobacterota_D	c__UBA1144	o__UBA2774	f__CSP1-2	g__HRBIN37	s__sp002898375	ASV762
	722	d__Bacteria	p__Actinobacteriota	c__Acidimicrobiia_401430	o__Acidimicrobiales	NA	NA	NA	ASV763
	723	d__Bacteria	p__Desulfobacterota_I	c__Desulfobacteria	o__Desulfobacterales	f__SG8-13	g__SG8-13	s__sp001303025	ASV765
	724	d__Bacteria	p__Proteobacteria	c__Gammaproteobacteria	o__Burkholderiales_597441	f__SG8-41	g__UBA5216	s__sp902825845	ASV766
	725	d__Bacteria	p__Actinobacteriota	c__Acidimicrobiia_401430	o__Acidimicrobiales	f__Ilumatobacteraceae	g__Ilumatobacter_A	NA	ASV767
	726	d__Bacteria	p__Chloroflexota	c__Anaerolineae	o__Anaerolineales	f__UBA4823	NA	NA	ASV768
	727	d__Bacteria	p__Proteobacteria	c__Gammaproteobacteria	o__HK1	f__HK1	g__HK1	s__sp000583135	ASV770
	728	d__Bacteria	p__Chloroflexota	c__Anaerolineae	o__Anaerolineales	NA	NA	NA	ASV771
	729	d__Bacteria	p__Desulfobacterota_E	c__MBNT15	o__MBNT15	f__MBNT15	NA	NA	ASV772
	730	d__Bacteria	p__Planctomycetota	c__Planctomycetia	o__Pirellulales	NA	NA	NA	ASV773
	731	d__Bacteria	p__Desulfobacterota_I	c__Desulfobulbia	o__Desulfobulbales	NA	NA	NA	ASV774
	732	d__Bacteria	p__Proteobacteria	c__Gammaproteobacteria	o__Pseudomonadales_641035	f__Marinomonadaceae	g__Marinomonas	s__aquimarina	ASV775
	733	d__Bacteria	p__Calditrichota	c__Calditrichia	o__Calditrichales	f__Calditrichaceae	NA	NA	ASV776
	734	d__Bacteria	p__Bacteroidota	c__Rhodothermia	o__Rhodothermales	f__UBA10348	g__1-14-0-65-60-17	s__sp002787815	ASV777
	735	d__Bacteria	p__Desulfobacterota_G_459544	c__BSN033	o__B13-G15	NA	NA	NA	ASV778
	736	d__Bacteria	p__Campylobacterota	c__Campylobacteria	o__Campylobacterales	f__Arcobacteraceae	NA	NA	ASV780
	737	d__Bacteria	p__Proteobacteria	c__Alphaproteobacteria	o__Rhodobacterales	f__Rhodobacteraceae	NA	NA	ASV781
	738	d__Bacteria	p__Calditrichota	c__Calditrichia	o__Calditrichales	f__Calditrichaceae	NA	NA	ASV782
	739	d__Bacteria	p__Proteobacteria	c__Alphaproteobacteria	NA	NA	NA	NA	ASV783
	740	d__Bacteria	p__Calditrichota	c__Calditrichia	o__RBG-13-44-9	f__J042	g__J075	NA	ASV784
	741	d__Bacteria	p__Bacteroidota	c__Bacteroidia	o__Bacteroidales	f__GCA-2748055	g__GCA-2748055	NA	ASV785
	742	d__Bacteria	p__Proteobacteria	c__Gammaproteobacteria	o__Enterobacterales_A_737866	f__Alteromonadaceae_665222	g__Alteromonas_F	s__macleodii_662112	ASV786
	743	d__Bacteria	p__Desulfobacterota_I	c__DSM-4660	o__Desulfatiglandales	f__HGW-15	NA	NA	ASV787
	744	d__Bacteria	p__Gemmatimonadota	c__Gemmatimonadetes	o__Longimicrobiales	f__UBA6960	NA	NA	ASV788
	745	d__Bacteria	p__Spirochaetota	c__Spirochaetia	o__SZUA-6	f__Bin103	g__Bin103	s__sp002238925	ASV789
	746	d__Bacteria	p__Proteobacteria	c__Alphaproteobacteria	o__Sphingomonadales	f__Sphingomonadaceae	g__Novosphingobium_485351	NA	ASV790
	747	d__Bacteria	p__Proteobacteria	c__Alphaproteobacteria	o__Sphingomonadales	f__Sphingomonadaceae	g__Novosphingobium_485351	NA	ASV791
	748	d__Bacteria	p__WOR-3	c__UBA3072	o__UBA3072	f__B12-G15	g__DTHG01	NA	ASV793
	749	d__Bacteria	p__Desulfobacterota_I	c__Desulfobacteria	o__Desulfobacterales	NA	NA	NA	ASV794
	750	d__Archaea	p__Asgardarchaeota	c__Lokiarchaeia	o__CR-4	f__SOKP01	g__SDNM01	s__sp004524535	ASV796
	751	d__Bacteria	p__Desulfobacterota_I	c__DSM-4660	o__Desulfatiglandales	f__HGW-15	NA	NA	ASV797
	752	d__Bacteria	p__Proteobacteria	c__Alphaproteobacteria	o__Rhizobiales_A_504705	f__Xanthobacteraceae_503485	NA	NA	ASV798
	753	d__Bacteria	p__Chloroflexota	c__Anaerolineae	o__Anaerolineales	NA	NA	NA	ASV799
	754	d__Bacteria	p__Zixibacteria	c__MSB-5A5_778959	o__UM-FILTER-46-8	f__UM-FILTER-46-8	g__UM-FILTER-46-8	s__sp002791595	ASV800
	755	d__Bacteria	p__Proteobacteria	c__Gammaproteobacteria	o__VBWC01	f__VBWC01	g__VBWC01	NA	ASV801
	756	d__Bacteria	p__Proteobacteria	c__Alphaproteobacteria	o__Sphingomonadales	f__Sphingomonadaceae	NA	NA	ASV802
	757	d__Bacteria	p__Proteobacteria	c__Alphaproteobacteria	o__Bin65	f__Bin65	g__Bin65	NA	ASV803
	758	d__Bacteria	p__Bacteroidota	c__Bacteroidia	o__Chitinophagales	f__Saprospiraceae	NA	NA	ASV804
	759	d__Bacteria	p__Spirochaetota	c__Spirochaetia	NA	NA	NA	NA	ASV805
	760	d__Bacteria	p__Proteobacteria	c__Gammaproteobacteria	o__Thiohalobacterales	f__Thiohalobacteraceae	g__Thiohalobacter	s__thiocyanaticus_A	ASV806
	761	d__Bacteria	p__Chloroflexota	c__Anaerolineae	o__Anaerolineales	NA	NA	NA	ASV808
	762	d__Bacteria	p__Proteobacteria	c__Gammaproteobacteria	NA	NA	NA	NA	ASV809
	763	d__Bacteria	p__Myxococcota_A_473307	c__Polyangia_463783	NA	NA	NA	NA	ASV810
	764	d__Bacteria	p__Proteobacteria	c__Gammaproteobacteria	NA	NA	NA	NA	ASV811
	765	d__Bacteria	p__Proteobacteria	c__Gammaproteobacteria	o__Thiohalobacterales	f__Thiohalobacteraceae	g__Thiohalobacter	NA	ASV812
	766	d__Bacteria	p__Actinobacteriota	c__Thermoleophilia	o__Gaiellales	f__Gaiellaceae	g__Palsa-739	s__sp003139545	ASV813
	767	d__Bacteria	p__Firmicutes_F	c__Halanaerobiia	o__Halobacteroidales	f__Halobacteroidaceae	g__Orenia_42969	s__Tepidibacillus decaturensis	ASV814
	768	d__Bacteria	p__Desulfobacterota_I	c__Dissulfuribacteria	o__Dissulfuribacterales	f__Dissulfuribacteraceae_451862	g__Dissulfurimicrobium	s__hydrothermale	ASV815
	769	d__Bacteria	p__Desulfobacterota_B	c__Binatia	o__HRBIN30	f__HRBIN30	g__HRBIN30	s__sp002898795	ASV816
	770	d__Bacteria	p__Firmicutes_D	c__Bacilli	o__Lactobacillales	f__Listeriaceae	g__Brochothrix	s__thermosphacta	ASV817
	771	d__Bacteria	p__Chlamydiota	c__Chlamydiia	o__Chlamydiales_778124	NA	NA	NA	ASV818
	772	d__Bacteria	p__Planctomycetota	c__Phycisphaerae	o__UBA1845	f__DSOQ01	g__DSOQ01	s__sp011053305	ASV821
	773	d__Bacteria	p__Desulfobacterota_C	c__Desulfomonilia	o__Desulfomonilales	f__Desulfomonilaceae	g__Desulfomonile	NA	ASV822
	774	d__Bacteria	p__Chloroflexota	c__Dehalococcoidia	o__DSTF01	f__WHTK01	g__WHTK01	s__sp009377745	ASV823
	775	d__Bacteria	p__Chloroflexota	c__Dehalococcoidia	o__Dehalococcoidales	f__W498	g__W498	s__sp011170285	ASV824
	776	d__Bacteria	p__Chloroflexota	c__Anaerolineae	o__Anaerolineales	f__UBA4823	g__NAK19	s__sp003327455	ASV825
	777	d__Bacteria	p__Proteobacteria	c__Gammaproteobacteria	o__Enterobacterales_A_737866	f__Vibrionaceae	g__Vibrio_678715	NA	ASV827
	778	d__Bacteria	p__Bacteroidota	c__Bacteroidia	NA	NA	NA	NA	ASV829
	779	d__Bacteria	p__Krumholzibacteriota	c__Krumholzibacteria	o__LZORAL124-64-63	f__LZORAL124-64-63	NA	NA	ASV830
	780	d__Archaea	p__Nanoarchaeota	c__Nanoarchaeia	o__Pacearchaeales	f__GW2011-AR1	g__BMS3ABIN17	s__sp002897655	ASV831
	781	d__Bacteria	p__Myxococcota_A_473307	c__UBA9160	o__UBA9160	NA	NA	NA	ASV833
	782	d__Bacteria	p__Firmicutes_A	c__Clostridia_258483	o__Peptostreptococcales	f__Peptostreptococcaceae_256921	g__Paraclostridium	NA	ASV834
	783	d__Bacteria	p__Chloroflexota	c__Dehalococcoidia	o__Dehalococcoidales	f__W498	g__W498	NA	ASV835
	784	d__Bacteria	p__Desulfobacterota_I	c__Desulfobacteria	o__Desulfobacterales	f__UBA11574	g__S5133MH16	s__sp004193595	ASV836
	785	d__Bacteria	p__Gemmatimonadota	c__Gemmatimonadetes	o__Longimicrobiales	f__UBA6960	g__BD2-11	s__sp002238605	ASV837
	786	d__Bacteria	p__Proteobacteria	c__Gammaproteobacteria	NA	NA	NA	NA	ASV838
	787	d__Bacteria	p__Acidobacteriota	c__Aminicenantia	o__Aminicenantales	f__Aminicenantaceae	NA	NA	ASV839
	788	d__Bacteria	p__Actinobacteriota	c__Actinomycetia	o__Euzebyales	f__Euzebyaceae	g__Euzebya	NA	ASV840
	789	d__Bacteria	p__Proteobacteria	c__Gammaproteobacteria	o__Tenderiales	f__Tenderiaceae	g__Tenderia	NA	ASV842
	790	d__Bacteria	p__Desulfobacterota_G_459544	c__BSN033	o__BSN033	f__UBA1163	g__DTGX01	NA	ASV843
	791	d__Bacteria	p__Acidobacteriota	c__UBA6911	o__UBA6911	f__UBA6911	g__Gp18-AA60	s__sp003225335	ASV844
	792	d__Archaea	p__Thermoproteota	c__Bathyarchaeia	o__B26-1	f__BA1	g__BA2	s__sp001399795	ASV845
	793	d__Bacteria	p__Actinobacteriota	c__Actinomycetia	o__Mycobacteriales	f__Mycobacteriaceae	g__Mycobacterium	NA	ASV846
	794	d__Bacteria	p__Proteobacteria	c__Alphaproteobacteria	o__Rhodobacterales	f__Rhodobacteraceae	g__Phaeobacter	s__italicus	ASV847
	795	d__Bacteria	p__Proteobacteria	c__Gammaproteobacteria	o__Enterobacterales_A_737866	f__Vibrionaceae	g__Vibrio_678715	s__Vibrio mytili	ASV848
	796	d__Bacteria	p__Firmicutes_A	c__Clostridia_258483	o__Lachnospirales	f__Lachnospiraceae	g__Anaerocolumna	NA	ASV850
	797	d__Bacteria	p__Desulfobacterota_I	c__Desulfobacteria	o__Desulfobacterales	f__SG8-13	g__SG8-13	s__sp001303025	ASV851
	798	d__Bacteria	p__Firmicutes_D	c__Bacilli	o__Thermoactinomycetales_367866	NA	NA	NA	ASV853
	799	d__Bacteria	p__Chloroflexota	c__Dehalococcoidia	o__DSTF01	f__WHTK01	g__WHTK01	s__sp009377745	ASV854
	800	d__Bacteria	p__Chloroflexota	c__Ktedonobacteria	o__Ktedonobacterales	f__Ktedonobacteraceae	g__CF-154	s__sp005879655	ASV855
	801	d__Bacteria	p__Proteobacteria	c__Alphaproteobacteria	o__Rhizobiales_A_501637	f__Kaistiaceae_501637	g__Bauldia	NA	ASV856
	802	d__Bacteria	p__Planctomycetota	c__Phycisphaerae	o__Phycisphaerales	f__SM1A02	g__CAADGA01	NA	ASV857
	803	d__Archaea	p__Thermoproteota	c__Bathyarchaeia	o__B26-1	f__BA1	g__SOJZ01	s__sp004376295	ASV858
	804	d__Bacteria	p__Chloroflexota	c__Dehalococcoidia	o__Dehalococcoidales	NA	NA	NA	ASV859
	805	d__Bacteria	p__Chloroflexota	c__Anaerolineae	o__B4-G1	f__DUEL01	g__SpSt-77	NA	ASV860
	806	d__Bacteria	p__Chloroflexota	c__Anaerolineae	o__Anaerolineales	f__EnvOPS12	g__UBA5796	NA	ASV861
	807	d__Bacteria	p__Desulfobacterota_I	c__DSM-4660	o__Desulfatiglandales	NA	NA	NA	ASV862
	808	d__Bacteria	p__Chloroflexota	c__Anaerolineae	o__Anaerolineales	f__EnvOPS12	g__UBA5796	NA	ASV863
	809	d__Bacteria	p__Proteobacteria	c__Gammaproteobacteria	o__Pseudomonadales_641030	f__Halomonadaceae_641030	g__Halomonas_E_640244	NA	ASV864
	810	d__Bacteria	p__Proteobacteria	c__Gammaproteobacteria	o__Enterobacterales_A_737866	f__Alteromonadaceae_665222	g__Idiomarina	s__aquatica	ASV865
	811	d__Bacteria	p__Proteobacteria	c__Gammaproteobacteria	o__Pseudomonadales_650612	f__Halieaceae	NA	NA	ASV866
	812	d__Bacteria	p__Cyanobacteria	c__Cyanobacteriia	o__Cyanobacteriales	f__Coleofasciculaceae_23353	g__SIO2C1	s__sp010672925	ASV867
	813	d__Bacteria	p__Myxococcota_A_473307	c__Bradymonadia	o__Bradymonadales	f__Bradymonadaceae	g__V1718	NA	ASV868
	814	d__Bacteria	p__Chloroflexota	c__Anaerolineae	o__Anaerolineales	NA	NA	NA	ASV869
	815	d__Bacteria	p__Actinobacteriota	c__Acidimicrobiia_401430	o__IMCC26256	NA	NA	NA	ASV870
	816	d__Bacteria	p__Proteobacteria	c__Alphaproteobacteria	o__Geminicoccales	f__Geminicoccaceae	NA	NA	ASV871
	817	d__Bacteria	p__Chloroflexota	c__Anaerolineae	o__Anaerolineales	NA	NA	NA	ASV872
	818	d__Bacteria	p__Bacteroidota	c__Bacteroidia	o__Bacteroidales	f__Marinilabiliaceae	NA	NA	ASV873
	819	d__Bacteria	p__Bacteroidota	c__Rhodothermia	o__Balneolales	f__Balneolaceae	g__YR4-1	s__sp011059145	ASV874
	820	d__Bacteria	p__Chloroflexota	c__Limnocylindria	o__Limnocylindrales	f__CSP1-4	g__GWC2-73-18	NA	ASV875
	821	d__Bacteria	p__Actinobacteriota	c__Acidimicrobiia_402965	o__UBA5794	f__UBA5794	g__SZUA-442	s__sp003235475	ASV877
	822	d__Bacteria	p__Myxococcota_A_473307	c__UBA9160	o__UBA9160	NA	NA	NA	ASV878
	823	d__Bacteria	p__Chloroflexota	c__Anaerolineae	o__4572-78	f__NAK82	g__NAK82	s__sp003130875	ASV879
	824	d__Archaea	p__Thermoproteota	c__Bathyarchaeia	o__B26-1	f__BA1	g__BA2	s__sp001399795	ASV880
	825	d__Bacteria	p__Proteobacteria	c__Gammaproteobacteria	o__Chromatiales_602660	f__Chromatiaceae_602660	g__Halochromatium	s__roseum	ASV881
	826	d__Bacteria	p__Actinobacteriota	c__Thermoleophilia	o__Solirubrobacterales	NA	NA	NA	ASV882
	827	d__Bacteria	p__Bacteroidota	c__Ignavibacteria	o__Ignavibacteriales	f__Ignavibacteriaceae_785640	NA	NA	ASV883
	828	d__Bacteria	p__Desulfobacterota_I	c__Desulfobacteria	o__Desulfobacterales	f__UBA11574	g__S5133MH16	s__sp004193595	ASV884
	829	d__Bacteria	p__Proteobacteria	c__Alphaproteobacteria	o__Geminicoccales	f__Geminicoccaceae	NA	NA	ASV885
	830	d__Bacteria	p__Actinobacteriota	c__Actinomycetia	o__Mycobacteriales	f__Mycobacteriaceae	g__Mycobacterium	NA	ASV886
	831	d__Bacteria	p__Actinobacteriota	c__Actinomycetia	NA	NA	NA	NA	ASV887
	832	d__Bacteria	p__Bacteroidota	c__Bacteroidia	o__Bacteroidales	f__VadinHA17_874699	g__HyVt-105	s__sp011049175	ASV888
	833	d__Bacteria	p__Acidobacteriota	c__Aminicenantia	o__Aminicenantales	f__Aminicenantaceae	NA	NA	ASV889
	834	d__Archaea	p__Thermoproteota	c__Bathyarchaeia	o__B26-1	f__UBA233	g__PALSA-986	s__sp003589585	ASV893
	835	d__Bacteria	p__Myxococcota_A_473307	c__Polyangia_463783	o__Polyangiales	f__Polyangiaceae	NA	NA	ASV894
	836	d__Archaea	p__Nanoarchaeota	c__Nanoarchaeia	o__Pacearchaeales	f__GW2011-AR1	g__BMS3ABIN17	s__sp002897655	ASV896
	837	d__Bacteria	p__Desulfobacterota_I	c__DSM-4660	o__Desulfatiglandales	f__HGW-15	NA	NA	ASV897
	838	d__Bacteria	p__Bacteroidota	c__Bacteroidia	o__Flavobacteriales_877923	f__Flavobacteriaceae	g__Zunongwangia	s__atlantica	ASV899
	839	d__Bacteria	p__Bacteroidota	c__Bacteroidia	o__Flavobacteriales_877923	f__Flavobacteriaceae	g__Robiginitalea	s__myxolifaciens	ASV901
	840	d__Bacteria	p__Proteobacteria	c__Gammaproteobacteria	o__Methylococcales	f__Methylothermaceae	NA	NA	ASV904
	841	d__Bacteria	p__Firmicutes_D	c__Bacilli	o__Bacillales_D_310495	f__Halobacillaceae	g__Halobacillus_A_288294	s__sp001592845	ASV905
	842	d__Bacteria	p__Bacteroidota	c__Ignavibacteria	o__Ignavibacteriales	f__Ignavibacteriaceae_785640	NA	NA	ASV906
	843	d__Bacteria	p__Chloroflexota	c__Dehalococcoidia	o__Dehalococcoidales	f__W498	g__W498	s__sp011170285	ASV907
	844	d__Bacteria	p__Desulfobacterota_G_459544	c__BSN033	o__BSN033	f__UBA1163	g__DTGX01	NA	ASV908
	845	d__Bacteria	p__Actinobacteriota	c__Acidimicrobiia_401430	o__IMCC26256	f__PALSA-555	g__SHUY01	s__sp009694435	ASV909
	846	d__Bacteria	p__Actinobacteriota	c__Actinomycetia	o__Euzebyales	NA	NA	NA	ASV910
	847	d__Bacteria	p__Actinobacteriota	c__Actinomycetia	o__Mycobacteriales	f__Mycobacteriaceae	g__Mycobacterium	NA	ASV911
	848	d__Bacteria	p__Firmicutes_B_370527	c__Clostridia_370351	o__Eubacteriales_370351	f__Peptococcaceae_370351	g__Desulfolucianica	s__intricata	ASV912
	849	d__Bacteria	p__Proteobacteria	c__Alphaproteobacteria	o__Rhizobiales_A_504721	NA	NA	NA	ASV913
	850	d__Bacteria	p__Proteobacteria	c__Gammaproteobacteria	o__Chromatiales_602942	f__Chromatiaceae_602942	g__Thiosymbion	s__oneisti	ASV915
	851	d__Bacteria	p__Acidobacteriota	c__Aminicenantia	o__Aminicenantales	f__Aminicenantaceae	NA	NA	ASV916
	852	d__Bacteria	p__Calditrichota	c__Calditrichia	o__RBG-13-44-9	f__J042	g__J075	NA	ASV917
	853	d__Bacteria	p__Nitrospirota_A_437815	c__Thermodesulfovibrionia	o__Thermodesulfovibrionales	NA	NA	NA	ASV918
	854	d__Bacteria	p__Actinobacteriota	c__Acidimicrobiia_401430	o__Acidimicrobiales	f__JACDCH01	g__VFJN01	NA	ASV919
	855	d__Bacteria	p__Zixibacteria	c__MSB-5A5_778960	o__GN15	f__PGXB01	g__PGXB01	s__sp002838945	ASV920
	856	d__Archaea	p__Nanoarchaeota	c__Nanoarchaeia	o__Pacearchaeales	f__GW2011-AR1	g__BMS3ABIN17	s__sp002897655	ASV921
	857	d__Bacteria	p__Proteobacteria	c__Gammaproteobacteria	o__Enterobacterales_A_737866	f__Vibrionaceae	g__Vibrio_678715	NA	ASV924
	858	d__Bacteria	p__Bacteroidota	c__Bacteroidia	o__Flavobacteriales_877923	f__Flavobacteriaceae	g__Mesonia_832444	s__Mesonia aquimarina	ASV925
	859	d__Bacteria	p__Chloroflexota	c__Dehalococcoidia	o__Dehalococcoidales	f__UBA1222	g__WRNP01	s__sp009776515	ASV926
	860	d__Bacteria	p__Desulfobacterota_G_459546	c__Desulfuromonadia	o__Desulfuromonadales	NA	NA	NA	ASV927
	861	d__Bacteria	p__Krumholzibacteriota	c__Krumholzibacteria	o__LZORAL124-64-63	f__LZORAL124-64-63	g__LZORAL124-64-63	s__sp002747875	ASV928
	862	d__Bacteria	p__Calditrichota	c__Calditrichia	o__RBG-13-44-9	f__J042	g__J075	NA	ASV931
	863	d__Bacteria	p__Desulfobacterota_I	c__DSM-4660	o__Desulfatiglandales	f__Desulfatiglandaceae	g__UBA5623	s__sp900258555	ASV932
	864	d__Bacteria	p__Gemmatimonadota	c__Gemmatimonadetes	o__Longimicrobiales	f__UBA6960	g__Bin94	NA	ASV933
	865	d__Bacteria	p__Actinobacteriota	c__Humimicrobiia	o__Humimicrobiales	f__Humimicrobiaceae	g__Halolacustris	NA	ASV934
	866	d__Bacteria	p__Deinococcota	c__Deinococci	o__Deinococcales	f__Trueperaceae	g__CSSed10-48	s__sp007695125	ASV935
	867	d__Bacteria	p__Cyanobacteria	c__Cyanobacteriia	o__Phormidesmiales	f__Phormidesmiaceae	g__Nodosilinea	NA	ASV936
	868	d__Bacteria	p__Proteobacteria	c__Gammaproteobacteria	o__Pseudomonadales_650611	f__Pseudomonadaceae	g__Pseudomonas_E_647464	s__fragi	ASV937
	869	d__Bacteria	p__Krumholzibacteriota	c__Krumholzibacteria	o__LZORAL124-64-63	f__LZORAL124-64-63	NA	NA	ASV938
	870	d__Bacteria	p__Actinobacteriota	c__Acidimicrobiia_402965	o__UBA5794	f__UBA5794	g__SZUA-442	s__sp003235475	ASV939
	871	d__Bacteria	p__Proteobacteria	c__Gammaproteobacteria	o__Pseudomonadales_637066	f__Oleiphilaceae_637066	g__Marinobacter_A_637054	s__nitratireducens	ASV941
	872	d__Bacteria	p__Proteobacteria	c__Gammaproteobacteria	o__Enterobacterales_A_737866	f__Alteromonadaceae_665222	g__Idiomarina	NA	ASV942
	873	d__Bacteria	p__Proteobacteria	c__Alphaproteobacteria	o__Rhodobacterales	f__Rhodobacteraceae	g__Salipiger_489082	NA	ASV944
	874	d__Bacteria	p__Spirochaetota	c__Spirochaetia	o__SZUA-6	f__Bin103	g__Bin103	s__sp002238925	ASV945
	875	d__Bacteria	p__Chloroflexota	c__Dehalococcoidia	o__DSTF01	f__WHTK01	g__WHTK01	s__sp009377745	ASV946
	876	d__Bacteria	p__Acidobacteriota	c__Thermoanaerobaculia	o__Thermoanaerobaculales	NA	NA	NA	ASV947
	877	d__Bacteria	p__Chloroflexota	NA	NA	NA	NA	NA	ASV948
	878	d__Bacteria	p__Desulfobacterota_G_459546	c__GWC2-55-46	o__GWC2-55-46	f__GWC2-55-46	g__UBA5799	NA	ASV949
	879	d__Bacteria	p__Calditrichota	c__Calditrichia	o__RBG-13-44-9	f__J042	g__J075	NA	ASV951
	880	d__Bacteria	p__Bacteroidota	c__Bacteroidia	o__Bacteroidales	f__VadinHA17_874699	g__DRPN01	NA	ASV952
	881	d__Bacteria	p__Proteobacteria	c__Gammaproteobacteria	o__DSM-19610	f__DSM-19610	g__Thiogranum	NA	ASV953
	882	d__Bacteria	p__Chloroflexota	c__Dehalococcoidia	o__SM23-28-2	NA	NA	NA	ASV954
	883	d__Bacteria	p__Bacteroidota	c__Bacteroidia	o__Bacteroidales	f__GCA-2748055	g__GCA-2748055	s__sp011056635	ASV956
	884	d__Bacteria	p__Proteobacteria	c__Gammaproteobacteria	NA	NA	NA	NA	ASV958
	885	d__Archaea	p__Halobacteriota	c__Halobacteria	o__Halobacteriales	f__Haloferacaceae	g__Halogeometricum	s__rufum	ASV959
	886	d__Bacteria	p__Actinobacteriota	c__Actinomycetia	o__Actinomycetales	f__Dermatophilaceae_390796	g__Phycicoccus_A_390311	s__flavus	ASV961
	887	d__Bacteria	p__Bacteroidota	c__Rhodothermia	o__Balneolales	f__Balneolaceae	NA	NA	ASV963
	888	d__Bacteria	p__Zixibacteria	c__MSB-5A5_778960	o__JAABVY01	f__JAABVY01	g__JAABVY01	NA	ASV964
	889	d__Bacteria	p__Deinococcota	c__Deinococci	o__Deinococcales	f__Trueperaceae	g__CSSed10-48	s__sp007695125	ASV965
	890	d__Archaea	p__Altiarchaeota	c__Altiarchaeia	o__IMC4_661	f__QMZM01	g__EX4484-2	s__sp002254565	ASV966
	891	d__Bacteria	p__Chloroflexota	c__Dehalococcoidia	o__Dehalococcoidales	f__W498	g__W498	s__sp011170285	ASV969
	892	d__Bacteria	p__Proteobacteria	c__Gammaproteobacteria	o__Pseudomonadales_650611	f__Pseudomonadaceae	g__Pseudomonas_E_647464	s__bubulae	ASV970
	893	d__Bacteria	p__Proteobacteria	c__Alphaproteobacteria	o__Rhodobacterales	f__Rhodobacteraceae	g__Salipiger_489036	s__Salipiger pacificus	ASV971
	894	d__Bacteria	p__Desulfobacterota_I	c__Desulfobacteria	o__Desulfobacterales	f__SG8-13	g__SG8-13	NA	ASV972
	895	d__Bacteria	p__Planctomycetota	c__Planctomycetia	o__Pirellulales	f__Lacipirellulaceae	g__Pirellulimonas	s__nuda	ASV973
	896	d__Bacteria	p__Acidobacteriota	NA	NA	NA	NA	NA	ASV974
	897	d__Bacteria	p__Chloroflexota	c__Dehalococcoidia	o__Dehalococcoidales	f__W498	g__W498	NA	ASV975
	898	d__Bacteria	p__Campylobacterota	c__Campylobacteria	o__Campylobacterales	f__Sulfurimonadaceae	NA	NA	ASV976
	899	d__Bacteria	p__Proteobacteria	c__Alphaproteobacteria	NA	NA	NA	NA	ASV979
	900	d__Bacteria	p__Myxococcota_A_473307	c__UBA9160	o__UBA9160	NA	NA	NA	ASV980
	901	d__Bacteria	p__Proteobacteria	c__Gammaproteobacteria	o__Enterobacterales_A_737866	f__Vibrionaceae	g__Vibrio_678715	s__Vibrio rotiferianus	ASV981
	902	d__Bacteria	p__WOR-3	c__UBA3072	o__UBA3072	f__B12-G15	g__DTHG01	NA	ASV982
	903	d__Bacteria	p__Proteobacteria	c__Alphaproteobacteria	NA	NA	NA	NA	ASV983
	904	d__Bacteria	p__Proteobacteria	c__Alphaproteobacteria	NA	NA	NA	NA	ASV984
	905	d__Bacteria	p__Chloroflexota	c__Anaerolineae	NA	NA	NA	NA	ASV985
	906	d__Bacteria	p__Desulfobacterota_I	c__Desulfobaccia	o__Desulfobaccales	f__Desulfobaccaceae	g__Desulfobacca	NA	ASV987
	907	d__Bacteria	p__Proteobacteria	c__Gammaproteobacteria	o__VBWC01	f__VBWC01	g__VBWC01	s__sp006218035	ASV988
	908	d__Bacteria	p__Desulfobacterota_I	c__Desulfobulbia	o__Desulfobulbales	f__Desulfurivibrionaceae	NA	NA	ASV990
	909	d__Bacteria	p__Chloroflexota	c__Dehalococcoidia	o__UBA2979	f__UBA2979	NA	NA	ASV991
	910	d__Bacteria	p__Gemmatimonadota	c__Gemmatimonadetes	o__Longimicrobiales	f__UBA6960	g__PXFI01	s__sp003564295	ASV992
	911	d__Bacteria	p__Bacteroidota	c__Bacteroidia	NA	NA	NA	NA	ASV993
	912	d__Bacteria	p__Spirochaetota	c__Spirochaetia	o__SZUA-6	f__Bin103	g__Bin103	NA	ASV995
	913	d__Bacteria	p__Firmicutes_D	c__Bacilli	o__Alicyclobacillales	f__Alicyclobacillaceae	g__Alicyclobacillus_B	NA	ASV996
	914	d__Bacteria	p__Chloroflexota	c__Anaerolineae	o__Anaerolineales	f__UBA11858	g__B10-G9	s__sp003648195	ASV997
	915	d__Bacteria	p__Chloroflexota	c__Anaerolineae	NA	NA	NA	NA	ASV998
	916	d__Bacteria	p__Chloroflexota	c__Anaerolineae	o__Anaerolineales	f__UBA4823	g__UBA6092	s__sp002428565	ASV999
	917	d__Bacteria	p__Chloroflexota	c__Anaerolineae	o__Anaerolineales	f__EnvOPS12	NA	NA	ASV1000
	918	d__Bacteria	p__Planctomycetota	c__Phycisphaerae	o__UBA1845	NA	NA	NA	ASV1001
	919	d__Bacteria	p__Proteobacteria	c__Alphaproteobacteria	o__Geminicoccales	f__Geminicoccaceae	g__JAAAPF01	s__sp009908425	ASV1002
	920	d__Archaea	p__Thermoproteota	c__Bathyarchaeia	o__B26-1	f__BA1	g__BA2	s__sp001399795	ASV1003
	921	d__Bacteria	p__Proteobacteria	c__Gammaproteobacteria	o__Enterobacterales_A_737866	f__Alteromonadaceae_665222	g__Idiomarina	s__piscisalsi	ASV1006
	922	d__Bacteria	p__Chloroflexota	c__Anaerolineae	NA	NA	NA	NA	ASV1007
	923	d__Bacteria	p__Actinobacteriota	c__Actinomycetia	o__Mycobacteriales	f__Mycobacteriaceae	g__Mycobacterium	NA	ASV1008
	924	d__Bacteria	p__Proteobacteria	c__Alphaproteobacteria	o__Rhizobiales_A_501396	f__Rhizobiaceae_A_499470	g__Mesorhizobium_F_498388	NA	ASV1010
	925	d__Bacteria	p__Gemmatimonadota	c__Gemmatimonadetes	o__Longimicrobiales	f__UBA6960	g__UBA2982	NA	ASV1011
	926	d__Bacteria	p__Proteobacteria	c__Alphaproteobacteria	NA	NA	NA	NA	ASV1013
	927	d__Bacteria	p__Desulfobacterota_I	c__DSM-4660	o__Desulfatiglandales	f__HGW-15	NA	NA	ASV1014
	928	d__Bacteria	p__Acidobacteriota	c__Aminicenantia	o__Aminicenantales	f__Aminicenantaceae	NA	NA	ASV1015
	929	d__Bacteria	p__Actinobacteriota	c__Thermoleophilia	o__Solirubrobacterales	NA	NA	NA	ASV1016
	930	d__Archaea	p__Asgardarchaeota	c__Lokiarchaeia	o__CR-4	f__SOKP01	g__SDNM01	s__sp004524535	ASV1017
	931	d__Bacteria	p__Firmicutes_D	c__Bacilli	o__Bacillales_D_310495	f__Halobacillaceae	g__Pontibacillus_A	s__salipaludis	ASV1018
	932	d__Bacteria	p__Campylobacterota	c__Campylobacteria	o__Campylobacterales	f__Arcobacteraceae	NA	NA	ASV1019
	933	d__Bacteria	p__Proteobacteria	c__Gammaproteobacteria	o__Pseudomonadales_641030	f__Halomonadaceae_641030	g__Halomonas_E_640244	s__smyrnensis	ASV1020
	934	d__Bacteria	p__Actinobacteriota	c__Aquicultoria	o__Aquicultorales	f__Aquicultoraceae	g__Aquicultor	NA	ASV1021
	935	d__Bacteria	p__Chloroflexota	c__Anaerolineae	o__B4-G1	f__DUEL01	g__SpSt-77	NA	ASV1022
	936	d__Bacteria	p__Firmicutes_F	c__Halanaerobiia	o__Halanaerobiales	f__DTU029	g__Halocella_43035	NA	ASV1023
	937	d__Bacteria	p__Desulfobacterota_I	c__Desulfobacteria	o__Desulfobacterales	f__Desulfosarcinaceae	g__Desulfosarcina	NA	ASV1024
	938	d__Bacteria	p__Spirochaetota	c__Spirochaetia	NA	NA	NA	NA	ASV1025
	939	d__Bacteria	p__Firmicutes_D	c__Bacilli	o__Bacillales_D_310495	f__Halobacillaceae	g__Pontibacillus_A	s__marinus	ASV1027
	940	d__Bacteria	p__Zixibacteria	NA	NA	NA	NA	NA	ASV1031
	941	d__Bacteria	p__Desulfobacterota_D	c__UBA1144	o__UBA2774	f__CSP1-2	g__HRBIN37	s__sp002898375	ASV1032
	942	d__Bacteria	p__Desulfobacterota_G_459544	c__BSN033	o__B13-G15	NA	NA	NA	ASV1033
	943	d__Archaea	p__Thermoproteota	c__Bathyarchaeia	NA	NA	NA	NA	ASV1034
	944	d__Bacteria	p__JdFR-76	c__JdFR-76	o__JdFR-76	f__JdFR-76	g__JdFR-76	s__sp002011685	ASV1036
	945	d__Bacteria	p__Proteobacteria	c__Gammaproteobacteria	o__Pseudomonadales_660954	f__HTCC2089_660954	g__SZUA-309	NA	ASV1037
	946	d__Bacteria	p__Bacteroidota	c__Bacteroidia	o__Bacteroidales	f__GCA-2748055	g__GCA-2748055	NA	ASV1038
	947	d__Bacteria	p__Chloroflexota	c__Dehalococcoidia	o__Dehalococcoidales	NA	NA	NA	ASV1039
	948	d__Bacteria	p__Proteobacteria	c__Gammaproteobacteria	NA	NA	NA	NA	ASV1040
	949	d__Bacteria	p__Acidobacteriota	c__Aminicenantia	o__Aminicenantales	f__Aminicenantaceae	NA	NA	ASV1041
	950	d__Bacteria	p__Proteobacteria	c__Gammaproteobacteria	o__Pseudomonadales_641035	f__Marinomonadaceae	g__Marinomonas	s__aquimarina	ASV1042
	951	d__Bacteria	p__Firmicutes_D	c__Bacilli	o__Lactobacillales	f__Streptococcaceae	g__Lactococcus_A_343306	s__carnosus	ASV1043
	952	d__Bacteria	p__Proteobacteria	c__Gammaproteobacteria	o__QQUJ01	f__QQUJ01	g__QQUJ01	NA	ASV1044
	953	d__Bacteria	p__Proteobacteria	c__Gammaproteobacteria	NA	NA	NA	NA	ASV1045
	954	d__Bacteria	p__Proteobacteria	c__Alphaproteobacteria	o__Rhodobacterales	f__Rhodobacteraceae	NA	NA	ASV1046
	955	d__Bacteria	p__Bacteroidota	c__Bacteroidia	o__Flavobacteriales_877923	f__Flavobacteriaceae	g__Robertkochia	s__marina	ASV1048
	956	d__Bacteria	p__Acidobacteriota	c__Aminicenantia	o__Aminicenantales	f__Aminicenantaceae	g__SOIV01	s__sp011049545	ASV1049
	957	d__Bacteria	p__Zixibacteria	c__MSB-5A5_778960	o__GN15	f__PGXB01	NA	NA	ASV1051
	958	d__Bacteria	p__Proteobacteria	c__Alphaproteobacteria	o__Rhodobacterales	f__Rhodobacteraceae	g__Solirhodobacter	s__olei	ASV1052
	959	d__Archaea	p__Thermoproteota	c__Bathyarchaeia	o__B26-1	f__UBA233	g__PALSA-986	NA	ASV1053
	960	d__Bacteria	p__Spirochaetota	c__Spirochaetia	o__SZUA-6	f__Bin103	g__Bin103	s__sp002238925	ASV1054
	961	d__Bacteria	p__Spirochaetota	c__Spirochaetia	o__Spirochaetales_A	f__DTKZ01	g__DTKZ01	s__sp011329335	ASV1055
	962	d__Bacteria	p__Bacteroidota	c__Bacteroidia	o__Bacteroidales	f__GCA-2748055	g__GCA-2748055	NA	ASV1056
	963	d__Bacteria	p__Proteobacteria	c__Gammaproteobacteria	o__Chromatiales_602660	f__Chromatiaceae_602660	g__Halochromatium	NA	ASV1059
	964	d__Bacteria	p__Proteobacteria	c__Gammaproteobacteria	o__Pseudomonadales_660954	f__HTCC2089_660954	g__SZUA-309	s__sp003228415	ASV1060
	965	d__Bacteria	p__Acidobacteriota	c__Thermoanaerobaculia	o__Thermoanaerobaculales	NA	NA	NA	ASV1061
	966	d__Bacteria	p__Proteobacteria	c__Alphaproteobacteria	o__Rhizobiales_A_504721	f__Methyloligellaceae	g__Methyloceanibacter	NA	ASV1062
	967	d__Bacteria	p__Desulfobacterota_I	c__Desulfobacteria	o__Desulfobacterales	f__SG8-13	g__SG8-13	s__sp001303025	ASV1063
	968	d__Bacteria	p__Myxococcota_A_473307	c__UBA9160	o__UBA9160	NA	NA	NA	ASV1064
	969	d__Bacteria	p__Proteobacteria	c__Alphaproteobacteria	o__Sneathiellales_505152	f__Sneathiellaceae_505152	g__Sneathiella	NA	ASV1065
	970	d__Bacteria	p__Proteobacteria	c__Gammaproteobacteria	NA	NA	NA	NA	ASV1066
	971	d__Bacteria	p__Proteobacteria	c__Alphaproteobacteria	o__Rhodospirillales_505895	f__2-12-FULL-67-15	g__2-12-FULL-67-15	NA	ASV1067
	972	d__Archaea	p__Halobacteriota	c__Halobacteria	o__Halobacteriales	f__Haloferacaceae	g__Halogranum	s__rubrum	ASV1068
	973	d__Bacteria	p__Planctomycetota	c__Planctomycetia	o__Planctomycetales	f__Mal52	g__Symmachiella	NA	ASV1071
	974	d__Bacteria	p__Proteobacteria	c__Alphaproteobacteria	o__Rhizobiales_A_504721	f__Methyloligellaceae	g__Methyloceanibacter	NA	ASV1072
	975	d__Bacteria	p__Verrucomicrobiota	c__Verrucomicrobiae	o__Pedosphaerales	f__UBA11358	g__WYBW01	NA	ASV1073
	976	d__Bacteria	p__Desulfobacterota_I	NA	NA	NA	NA	NA	ASV1075
	977	d__Bacteria	p__Bacteroidota	c__Bacteroidia	NA	NA	NA	NA	ASV1076
	978	d__Bacteria	p__Bacteroidota	c__Rhodothermia	o__Balneolales	f__Balneolaceae	NA	NA	ASV1078
	979	d__Bacteria	p__Firmicutes_D	c__Bacilli	o__Lactobacillales	f__Streptococcaceae	g__Lactococcus_A_343306	s__carnosus	ASV1079
	980	d__Bacteria	p__Proteobacteria	c__Gammaproteobacteria	o__Pseudomonadales_641035	f__Marinomonadaceae	g__Marinomonas	s__ostreistagni	ASV1080
	981	d__Bacteria	p__Proteobacteria	c__Gammaproteobacteria	o__Pseudomonadales_650612	f__Cellvibrionaceae	g__Microbulbifer	s__celer	ASV1082
	982	d__Bacteria	p__Actinobacteriota	c__Actinomycetia	o__Actinomycetales	f__Dermatophilaceae_390796	g__Phycicoccus_A_390311	s__flavus	ASV1083
	983	d__Bacteria	p__Zixibacteria	c__MSB-5A5_778960	o__GN15	f__PGXB01	NA	NA	ASV1084
	984	d__Bacteria	p__Desulfobacterota_I	c__DSM-4660	o__Desulfatiglandales	f__Desulfatiglandaceae	g__UBA5623	NA	ASV1085
	985	d__Bacteria	p__Bacteroidota	c__Ignavibacteria	o__Ignavibacteriales	f__Ignavibacteriaceae_785640	NA	NA	ASV1086
	986	d__Bacteria	p__Firmicutes_F	c__Halanaerobiia	o__Halanaerobiales	f__Halanaerobiaceae_43036	g__Halocella_43036	s__Halocella cellulosilytica	ASV1087
	987	d__Bacteria	p__Proteobacteria	c__Alphaproteobacteria	o__Rhizobiales_A_501396	f__Rhizobiaceae_A_499470	NA	NA	ASV1089
	988	d__Bacteria	p__Planctomycetota	c__Planctomycetia	o__Planctomycetales	f__Planctomycetaceae	g__Thalassoglobus	s__neptunius	ASV1090
	989	d__Bacteria	p__Bacteroidota	c__Rhodothermia	o__Balneolales	f__Balneolaceae	g__YR4-1	s__sp011059145	ASV1091
	990	d__Bacteria	p__Planctomycetota	c__Brocadiae	o__SM23-32	f__SM23-32	g__B1Sed10-231	s__sp003551305	ASV1092
	991	d__Bacteria	p__Planctomycetota	c__Planctomycetia	o__Pirellulales	f__Lacipirellulaceae	NA	NA	ASV1093
	992	d__Archaea	p__Asgardarchaeota	c__Lokiarchaeia	o__CR-4	f__SOKP01	g__SDNM01	s__sp004524535	ASV1095
	993	d__Bacteria	p__Acidobacteriota	c__Thermoanaerobaculia	o__Thermoanaerobaculales	NA	NA	NA	ASV1096
	994	d__Bacteria	p__Actinobacteriota	c__Thermoleophilia	o__Solirubrobacterales	f__70-9	g__VAYN01	s__sp005885405	ASV1097
	995	d__Bacteria	p__Bacteroidota	c__Bacteroidia	o__Bacteroidales	f__GCA-2748055	g__GCA-2748055	NA	ASV1098
	996	d__Bacteria	p__Bacteroidota	c__Bacteroidia	o__Bacteroidales	f__GCA-2748055	g__GCA-2748055	NA	ASV1099
	997	d__Bacteria	p__Chloroflexota	c__Dehalococcoidia	o__Dehalococcoidales	f__W498	g__W498	NA	ASV1100
	998	d__Bacteria	p__Spirochaetota	NA	NA	NA	NA	NA	ASV1101
	999	d__Bacteria	p__Proteobacteria	c__Gammaproteobacteria	o__Xanthomonadales_613062	f__Rhodanobacteraceae_613062	g__Oleiagrimonas	s__citrea	ASV1102
	1000	d__Bacteria	p__Firmicutes_D	c__Bacilli	o__Bacillales_B_302584	f__DSM-18226_301387	g__Bacillus_AB	s__infantis	ASV1103
	1001	d__Bacteria	p__Desulfobacterota_I	c__Desulfobacteria	o__Desulfobacterales	f__Desulfosarcinaceae	g__Desulfosarcina	s__cetonica	ASV1104
	1002	d__Bacteria	p__Chloroflexota	c__Chloroflexia	o__Thermomicrobiales	NA	NA	NA	ASV1105
	1003	d__Bacteria	p__Gemmatimonadota	c__Gemmatimonadetes	o__Longimicrobiales	f__UBA6960	g__PXFI01	s__sp003564295	ASV1106
	1004	d__Bacteria	p__Spirochaetota	c__Spirochaetia	NA	NA	NA	NA	ASV1107
	1005	d__Bacteria	p__Proteobacteria	c__Gammaproteobacteria	o__Enterobacterales_A_737866	f__Vibrionaceae	g__Salinivibrio	NA	ASV1108
	1006	d__Bacteria	p__Desulfobacterota_I	c__Desulfobacteria	o__Desulfobacterales	f__UBA11574	g__S5133MH16	s__sp004193595	ASV1109
	1007	d__Bacteria	p__Firmicutes_E	NA	NA	NA	NA	NA	ASV1110
	1008	d__Bacteria	p__Actinobacteriota	c__Actinomycetia	o__Mycobacteriales	f__Mycobacteriaceae	g__Mycobacterium	NA	ASV1111
	1009	d__Bacteria	p__Proteobacteria	c__Alphaproteobacteria	o__Rhizobiales_A_501637	f__Kaistiaceae_501637	g__Bauldia	NA	ASV1112
	1010	d__Bacteria	p__Gemmatimonadota	c__Gemmatimonadetes	o__Longimicrobiales	f__UBA6960	g__UBA2982	NA	ASV1113
	1011	d__Bacteria	p__Desulfobacterota_I	c__Syntrophobacteria	o__Syntrophobacterales	NA	NA	NA	ASV1114
	1012	d__Bacteria	p__Calditrichota	c__Calditrichia	o__RBG-13-44-9	f__J042	g__J075	NA	ASV1117
	1013	d__Bacteria	p__Proteobacteria	c__Gammaproteobacteria	o__Pseudomonadales_650612	f__Halieaceae	g__Parahaliea	s__maris	ASV1119
	1014	d__Bacteria	p__Chloroflexota	c__Anaerolineae	o__Anaerolineales	NA	NA	NA	ASV1120
	1015	d__Bacteria	p__Krumholzibacteriota	c__Krumholzibacteria	o__LZORAL124-64-63	f__LZORAL124-64-63	NA	NA	ASV1121
	1016	d__Bacteria	p__Desulfobacterota_D	c__UBA1144	o__UBA2774	f__UBA2774	g__CR02bin9	NA	ASV1122
	1017	d__Bacteria	p__Chloroflexota	c__Anaerolineae	o__Anaerolineales	f__EnvOPS12	NA	NA	ASV1123
	1018	d__Bacteria	p__Gemmatimonadota	c__Gemmatimonadetes	o__Longimicrobiales	f__UBA6960	g__UBA2982	s__sp009692205	ASV1124
	1019	d__Bacteria	p__Gemmatimonadota	c__Gemmatimonadetes	o__Longimicrobiales	f__UBA6960	g__UBA2982	s__sp009692205	ASV1126
	1020	d__Bacteria	p__Chloroflexota	c__Dehalococcoidia	o__Dehalococcoidales	NA	NA	NA	ASV1127
	1021	d__Bacteria	p__Chloroflexota	c__Chloroflexia	o__Thermomicrobiales	f__Thermomicrobiaceae	g__Sphaerobacter	s__thermophilus	ASV1128
	1022	d__Bacteria	p__Proteobacteria	c__Gammaproteobacteria	o__GCA-2729495	f__GCA-2729495	g__GCA-002729875	s__sp002688175	ASV1129
	1023	d__Bacteria	p__Proteobacteria	c__Gammaproteobacteria	o__Chromatiales_602942	f__Chromatiaceae_602942	g__Thiosymbion	s__oneisti	ASV1131
	1024	d__Bacteria	p__Proteobacteria	c__Gammaproteobacteria	o__Pseudomonadales_660954	f__HTCC2089_660954	NA	NA	ASV1133
	1025	d__Bacteria	p__Bacteroidota	c__Bacteroidia	o__Bacteroidales	f__GCA-2748055	g__GCA-2748055	NA	ASV1134
	1026	d__Bacteria	p__Chloroflexota	c__Anaerolineae	NA	NA	NA	NA	ASV1135
	1027	d__Bacteria	p__Chloroflexota	c__Anaerolineae	o__UBA7937	f__B3-Chlor	g__B3-Chlor	s__sp005223035	ASV1136
	1028	d__Bacteria	p__Proteobacteria	c__Gammaproteobacteria	NA	NA	NA	NA	ASV1137
	1029	d__Bacteria	p__Chloroflexota	c__Anaerolineae	NA	NA	NA	NA	ASV1138
	1030	d__Bacteria	p__Cyanobacteria	c__Cyanobacteriia	o__Cyanobacteriales	f__Xenococcaceae	NA	NA	ASV1139
	1031	d__Bacteria	p__Bacteroidota	c__Bacteroidia	o__Flavobacteriales_877923	f__Flavobacteriaceae	g__Robiginitalea	NA	ASV1140
	1032	d__Bacteria	p__Desulfobacterota_E	c__MBNT15	o__MBNT15	f__MBNT15	g__CG2-30-66-27	NA	ASV1141
	1033	d__Archaea	p__Halobacteriota	c__Halobacteria	o__Halobacteriales	f__Haloferacaceae	g__Halogranum	s__rubrum	ASV1142
	1034	d__Bacteria	p__Actinobacteriota	c__Acidimicrobiia_402965	o__UBA5794	f__UBA5794	g__SZUA-442	s__sp003235475	ASV1143
	1035	d__Bacteria	p__Proteobacteria	c__Gammaproteobacteria	o__Methylococcales	f__Methylothermaceae	NA	NA	ASV1144
	1036	d__Bacteria	p__Proteobacteria	c__Gammaproteobacteria	o__Pseudomonadales_641030	f__Halomonadaceae_641030	g__Halomonas_E_640244	NA	ASV1145
	1037	d__Bacteria	p__Acidobacteriota	c__Aminicenantia	o__Aminicenantales	f__Aminicenantaceae	NA	NA	ASV1146
	1038	d__Bacteria	p__Desulfobacterota_I	c__DSM-4660	o__Desulfatiglandales	f__HGW-15	g__JAAZBV01	NA	ASV1147
	1039	d__Archaea	p__Asgardarchaeota	c__Thorarchaeia	o__Thorarchaeales	f__Thorarchaeaceae	NA	NA	ASV1148
	1040	d__Bacteria	p__Chloroflexota	c__Dehalococcoidia	o__Dehalococcoidales	f__W498	g__W498	NA	ASV1149
	1041	d__Bacteria	p__Eisenbacteria	c__RBG-16-71-46	NA	NA	NA	NA	ASV1150
	1042	d__Bacteria	p__Myxococcota_A_473307	c__UBA9160	o__UBA9160	NA	NA	NA	ASV1151
	1043	d__Bacteria	p__Chloroflexota	c__Anaerolineae	o__B4-G1	f__DUEL01	g__SpSt-77	NA	ASV1153
	1044	d__Bacteria	p__Patescibacteria	c__Saccharimonadia	o__Saccharimonadales	f__UBA4665	NA	NA	ASV1154
	1045	d__Bacteria	p__Proteobacteria	c__Gammaproteobacteria	o__Methylococcales	f__Methylothermaceae	NA	NA	ASV1155
	1046	d__Bacteria	p__Actinobacteriota	c__Acidimicrobiia_402965	o__UBA5794	f__UBA5794	g__SZUA-442	s__sp003235475	ASV1156
	1047	d__Bacteria	p__Chloroflexota	c__Anaerolineae	o__B4-G1	f__DUEL01	g__SpSt-77	NA	ASV1157
	1048	d__Bacteria	p__Chloroflexota	c__Dehalococcoidia	o__Dehalococcoidales	f__W498	g__W498	NA	ASV1158
	1049	d__Bacteria	p__Calditrichota	c__Calditrichia	o__Calditrichales	f__Calditrichaceae	NA	NA	ASV1159
	1050	d__Bacteria	p__Firmicutes_D	c__Bacilli	o__Lactobacillales	f__Streptococcaceae	g__Lactococcus_A_343306	s__raffinolactis	ASV1161
	1051	d__Bacteria	p__Proteobacteria	c__Gammaproteobacteria	o__Pseudomonadales_641035	f__Marinomonadaceae	g__Marinomonas	s__piezotolerans	ASV1162
	1052	d__Bacteria	p__Chloroflexota	c__Anaerolineae	o__Caldilineales	f__Caldilineaceae	NA	NA	ASV1164
	1053	d__Bacteria	p__Actinobacteriota	c__Actinomycetia	o__Euzebyales	NA	NA	NA	ASV1166
	1054	d__Bacteria	p__Bacteroidota	c__Bacteroidia	o__Bacteroidales	f__JAAYUG01	g__JAAYUG01	NA	ASV1167
	1055	d__Bacteria	p__Bacteroidota	c__Bacteroidia	NA	NA	NA	NA	ASV1168
	1056	d__Bacteria	p__Chloroflexota	c__Dehalococcoidia	o__Dehalococcoidales	f__W498	g__W498	NA	ASV1169
	1057	d__Bacteria	p__Chloroflexota	c__Anaerolineae	o__Promineofilales	f__Promineofilaceae	NA	NA	ASV1170
	1058	d__Bacteria	p__Proteobacteria	c__Alphaproteobacteria	o__Rhodospirillales_505895	f__UXAT02	g__Defluviicoccus_A	s__seviourii	ASV1171
	1059	d__Bacteria	p__Chloroflexota	c__Dehalococcoidia	o__UBA2979	f__UBA2979	g__VXMT01	s__sp009840945	ASV1172
	1060	d__Bacteria	p__Chloroflexota	c__Anaerolineae	o__Caldilineales	f__Caldilineaceae	NA	NA	ASV1173
	1061	d__Bacteria	p__Desulfobacterota_I	c__Desulfobacteria	o__Desulfobacterales	f__Desulfobacteraceae_457481	g__Desulfobacterium	NA	ASV1174
	1062	d__Bacteria	p__Chloroflexota	c__Chloroflexia	o__Thermomicrobiales	f__Thermomicrobiaceae	g__Sphaerobacter	s__thermophilus	ASV1175
	1063	d__Bacteria	p__Proteobacteria	c__Gammaproteobacteria	o__Nitrococcales	f__Nitrococcaceae	g__E85	s__sp003149435	ASV1176
	1064	d__Bacteria	p__Chloroflexota	c__Anaerolineae	NA	NA	NA	NA	ASV1177
	1065	d__Bacteria	p__Desulfobacterota_I	c__Desulfobulbia	o__Desulfobulbales	f__Desulfocapsaceae	g__Desulfofustis	s__glycolicus	ASV1181
	1066	d__Bacteria	p__Proteobacteria	c__Gammaproteobacteria	o__Pseudomonadales_650612	f__Cellvibrionaceae	g__Microbulbifer	s__hydrolyticus	ASV1182
	1067	d__Bacteria	p__Acidobacteriota	c__Aminicenantia	o__Aminicenantales	f__Aminicenantaceae	NA	NA	ASV1183
	1068	d__Bacteria	p__Proteobacteria	c__Gammaproteobacteria	o__Burkholderiales_597433	f__SG8-39	g__SCGC-AG-212-J23	s__sp005881595	ASV1184
	1069	d__Bacteria	p__Firmicutes_D	c__Bacilli	o__Lactobacillales	f__Lactobacillaceae	g__Leuconostoc_B	NA	ASV1185
	1070	d__Bacteria	p__Proteobacteria	c__Alphaproteobacteria	o__Rhizobiales_A_504721	f__Methyloligellaceae	g__UBA2767	s__sp002897995	ASV1186
	1071	d__Bacteria	p__Zixibacteria	NA	NA	NA	NA	NA	ASV1187
	1072	d__Bacteria	p__Planctomycetota	c__Phycisphaerae	o__UBA1845	f__PWPN01	NA	NA	ASV1188
	1073	d__Bacteria	p__Proteobacteria	c__Alphaproteobacteria	o__Parvibaculales	f__RS24	NA	NA	ASV1189
	1074	d__Bacteria	p__Proteobacteria	c__Alphaproteobacteria	o__Rhizobiales_A_501394	f__Rhizobiaceae_A_501394	g__SPNT01	NA	ASV1192
	1075	d__Bacteria	p__Gemmatimonadota	c__Gemmatimonadetes	o__Longimicrobiales	f__UBA6960	g__PXFI01	s__sp003564295	ASV1193
	1076	d__Bacteria	p__Myxococcota_A_473307	c__Polyangia_463783	o__Polyangiales	f__Polyangiaceae	NA	NA	ASV1194
	1077	d__Bacteria	p__Acidobacteriota	c__Thermoanaerobaculia	o__UBA5704	f__UBA5704	NA	NA	ASV1195
	1078	d__Bacteria	p__Chloroflexota	NA	NA	NA	NA	NA	ASV1196
	1079	d__Bacteria	p__Gemmatimonadota	c__Gemmatimonadetes	o__Longimicrobiales	f__UBA6960	g__PXFI01	s__sp003564295	ASV1197
	1080	d__Bacteria	p__Proteobacteria	c__Gammaproteobacteria	NA	NA	NA	NA	ASV1199
	1081	d__Archaea	p__Nanoarchaeota	c__Nanoarchaeia	o__Pacearchaeales	f__GW2011-AR1	g__BMS3ABIN17	s__sp002897655	ASV1201
	1082	d__Bacteria	p__WOR-3	c__UBA3072	o__UBA3072	f__B12-G15	g__DTHG01	NA	ASV1202
	1083	d__Bacteria	p__Desulfobacterota_I	c__DSM-4660	o__Desulfatiglandales	f__Desulfatiglandaceae	g__UBA5623	NA	ASV1204
	1084	d__Bacteria	p__Proteobacteria	c__Gammaproteobacteria	o__Enterobacterales_A_737866	f__Alteromonadaceae_665222	g__Pseudidiomarina	s__sediminum	ASV1207
	1085	d__Bacteria	p__Bacteroidota	c__Rhodothermia	o__Balneolales	f__Balneolaceae	g__Fodinibius_786578	s__Fodinibius saliphilus	ASV1208
	1086	d__Bacteria	p__Proteobacteria	c__Gammaproteobacteria	o__GCA-2729495	f__GCA-2729495	g__GCA-002729875	s__sp002688175	ASV1209
	1087	d__Bacteria	p__Myxococcota_A_473307	c__Polyangia_463783	o__Haliangiales_463188	f__Haliangiaceae_463188	g__Haliangium_463188	s__Haliangium ochraceum	ASV1210
	1088	d__Bacteria	p__Planctomycetota	c__Phycisphaerae	o__Phycisphaerales	f__SM1A02	NA	NA	ASV1211
	1089	d__Bacteria	p__Chlamydiota	NA	NA	NA	NA	NA	ASV1212
	1090	d__Bacteria	p__Chloroflexota	c__Anaerolineae	o__Anaerolineales	NA	NA	NA	ASV1213
	1091	d__Bacteria	p__Acidobacteriota	c__Aminicenantia	o__Aminicenantales	f__Aminicenantaceae	NA	NA	ASV1214
	1092	d__Bacteria	p__Desulfobacterota_I	c__Desulfobacteria	o__Desulfobacterales	f__SG8-13	g__SG8-13	s__sp001303025	ASV1215
	1093	d__Bacteria	p__Spirochaetota	NA	NA	NA	NA	NA	ASV1218
	1094	d__Bacteria	p__Chloroflexota	c__Anaerolineae	o__Anaerolineales	f__Anaerolineaceae_409200	NA	NA	ASV1219
	1095	d__Bacteria	p__Chloroflexota	c__Anaerolineae	NA	NA	NA	NA	ASV1220
	1096	d__Bacteria	p__Chloroflexota	c__Anaerolineae	NA	NA	NA	NA	ASV1221
	1097	d__Bacteria	p__Actinobacteriota	c__Acidimicrobiia_402965	o__UBA5794	f__UBA5794	g__SZUA-442	NA	ASV1222
	1098	d__Bacteria	p__Bacteroidota	c__Bacteroidia	o__Flavobacteriales_877923	f__Flavobacteriaceae	NA	NA	ASV1227
	1099	d__Bacteria	p__Chloroflexota	c__Dehalococcoidia	o__GIF9	f__AB-539-J10	NA	NA	ASV1228
	1100	d__Bacteria	p__Acidobacteriota	c__Vicinamibacteria	o__Bin61	f__SMYC01	g__SMYC01	s__sp004356105	ASV1229
	1101	d__Bacteria	p__Desulfobacterota_I	c__Desulfobacteria	o__Desulfobacterales	f__Desulfosarcinaceae	g__Desulfatitalea	NA	ASV1230
	1102	d__Archaea	p__Thermoproteota	c__Bathyarchaeia	o__B26-1	f__BA1	g__BA2	s__sp001399795	ASV1231
	1103	d__Archaea	p__Thermoproteota	c__Bathyarchaeia	o__B26-1	f__UBA233	g__PALSA-986	s__sp003589585	ASV1232
	1104	d__Bacteria	p__Firmicutes_D	c__Bacilli	o__Bacillales_B_302584	f__Bacillaceae_B_301660	g__Rossellomorea	NA	ASV1233
	1105	d__Bacteria	p__Gemmatimonadota	c__Gemmatimonadetes	o__KS3-K002	f__JABDQB01	g__JAAXHJ01	s__sp009838765	ASV1234
	1106	d__Bacteria	p__Proteobacteria	c__Gammaproteobacteria	o__Tenderiales	f__Tenderiaceae	g__Tenderia	NA	ASV1236
	1107	d__Bacteria	p__Proteobacteria	c__Gammaproteobacteria	o__Enterobacterales_A_737866	f__Vibrionaceae	g__Vibrio_678715	NA	ASV1238
	1108	d__Bacteria	p__Chloroflexota	c__Dehalococcoidia	o__DSTF01	f__WHTK01	g__WHTK01	s__sp009377745	ASV1241
	1109	d__Bacteria	p__Krumholzibacteriota	c__Krumholzibacteria	o__LZORAL124-64-63	f__LZORAL124-64-63	NA	NA	ASV1242
	1110	d__Bacteria	p__Actinobacteriota	c__Acidimicrobiia_401430	o__IMCC26256	NA	NA	NA	ASV1243
	1111	d__Bacteria	p__Proteobacteria	c__Alphaproteobacteria	o__Rhizobiales_A_504721	f__Methyloligellaceae	g__Methyloceanibacter	NA	ASV1244
	1112	d__Bacteria	p__Actinobacteriota	c__Acidimicrobiia_401430	o__Acidimicrobiales	f__UBA11606	g__VYCW01	s__sp009842325	ASV1245
	1113	d__Bacteria	p__Proteobacteria	c__Gammaproteobacteria	NA	NA	NA	NA	ASV1246
	1114	d__Bacteria	p__Proteobacteria	c__Alphaproteobacteria	o__Rhizobiales_A_504721	f__Methyloligellaceae	g__Methyloceanibacter	s__marginalis	ASV1247
	1115	d__Bacteria	p__Desulfobacterota_I	c__Desulfobacteria	o__Desulfobacterales	f__UBA11574	g__S5133MH16	s__sp004193595	ASV1248
	1116	d__Bacteria	p__Firmicutes_F	c__Halanaerobiia	o__Halanaerobiales	f__Halanaerobiaceae_43036	g__Halocella_43036	s__Halocella cellulosilytica	ASV1250
	1117	d__Bacteria	p__Proteobacteria	c__Alphaproteobacteria	NA	NA	NA	NA	ASV1251
	1118	d__Bacteria	p__Desulfobacterota_I	c__Syntrophobacteria	o__Syntrophobacterales	NA	NA	NA	ASV1253
	1119	d__Bacteria	p__Proteobacteria	c__Alphaproteobacteria	NA	NA	NA	NA	ASV1255
	1120	d__Bacteria	p__Firmicutes_D	c__Bacilli	o__Bacillales_G_286742	f__UBA6769	g__Maribacillus	s__taeanensis	ASV1256
	1121	d__Bacteria	p__Proteobacteria	c__Gammaproteobacteria	o__Thiohalomonadales	f__Thiohalomonadaceae_597810	g__Thiohalomonas	s__denitrificans	ASV1257
	1122	d__Bacteria	p__Firmicutes_D	c__Bacilli	o__Bacillales_D_310495	f__Halobacillaceae	g__Halobacillus_A_288222	s__naozhouensis	ASV1260
	1123	d__Archaea	p__Thermoproteota	c__Bathyarchaeia	o__B26-1	f__BA1	g__SOJZ01	s__sp004376295	ASV1261
	1124	d__Bacteria	p__Desulfobacterota_I	c__DSM-4660	o__Desulfatiglandales	NA	NA	NA	ASV1262
	1125	d__Bacteria	p__Proteobacteria	c__Gammaproteobacteria	o__QQUJ01	f__QQUJ01	g__QQUJ01	NA	ASV1263
	1126	d__Bacteria	p__Desulfobacterota_I	c__Desulfobacteria	o__Desulfobacterales	f__SG8-13	g__SG8-13	s__sp001303025	ASV1264
	1127	d__Bacteria	p__Acidobacteriota	c__Aminicenantia	o__Aminicenantales	f__Aminicenantaceae	NA	NA	ASV1265
	1128	d__Bacteria	p__Gemmatimonadota	c__Gemmatimonadetes	o__KS3-K002	f__JABDQB01	g__JAAXHJ01	s__sp009838765	ASV1267
	1129	d__Bacteria	p__Chloroflexota	c__Anaerolineae	NA	NA	NA	NA	ASV1268
	1130	d__Bacteria	p__Chloroflexota	c__Anaerolineae	o__Aggregatilineales	f__Aggregatilineaceae	g__Aggregatilinea	s__lenta	ASV1269
	1131	d__Bacteria	p__Desulfobacterota_I	c__DSM-4660	o__Desulfatiglandales	f__Desulfatiglandaceae	g__UBA5623	NA	ASV1274
	1132	d__Archaea	p__Thermoproteota	c__Bathyarchaeia	o__B26-1	f__SOJC01	g__SOJC01	s__sp004376645	ASV1276
	1133	d__Archaea	p__Asgardarchaeota	c__Lokiarchaeia	o__CR-4	f__SOKP01	g__SDNM01	s__sp004524535	ASV1277
	1134	d__Bacteria	p__Zixibacteria	c__MSB-5A5_778960	o__GN15	f__PGXB01	g__PGXB01	s__sp002838945	ASV1278
	1135	d__Bacteria	p__Proteobacteria	c__Gammaproteobacteria	o__DSM-19610	f__DSM-19610	g__Thiogranum	s__longum	ASV1279
	1136	d__Bacteria	p__Desulfobacterota_I	c__Desulfobacteria	o__Desulfobacterales	f__Desulfosarcinaceae	g__Desulfatitalea	NA	ASV1280
	1137	d__Bacteria	p__Desulfobacterota_I	c__Desulfobacteria	o__Desulfobacterales	f__Desulfosarcinaceae	g__Desulfatitalea	NA	ASV1282
	1138	d__Archaea	p__Asgardarchaeota	c__Lokiarchaeia	o__CR-4	f__SOKP01	g__SDNM01	s__sp004524535	ASV1283
	1139	d__Bacteria	p__Bacteroidota	c__Bacteroidia	o__Bacteroidales	f__GCA-2748055	g__GCA-2748055	s__sp011056635	ASV1284
	1140	d__Bacteria	p__Proteobacteria	c__Gammaproteobacteria	o__Chromatiales_602636	f__Chromatiaceae_602636	g__Thiohalocapsa_602636	s__Thiohalocapsa halophila	ASV1286
	1141	d__Bacteria	p__Proteobacteria	c__Gammaproteobacteria	o__DSM-19610	f__DSM-19610	g__Thiogranum	NA	ASV1289
	1142	d__Bacteria	p__Proteobacteria	c__Alphaproteobacteria	o__Rhizobiales_A_501396	f__Rhizobiaceae_A_499470	NA	NA	ASV1290
	1143	d__Bacteria	p__Actinobacteriota	c__Acidimicrobiia_402965	o__UBA5794	f__UBA5794	g__SZUA-442	s__sp003235475	ASV1291
	1144	d__Bacteria	p__Firmicutes_D	c__Bacilli	o__Tepidibacillales	f__Tepidibacillaceae	g__Vulcanibacillus	NA	ASV1292
	1145	d__Archaea	p__Thermoproteota	c__Bathyarchaeia	o__TCS64	f__TCS64	g__GCA-2726865	s__sp002726865	ASV1293
	1146	d__Bacteria	p__Calditrichota	c__Calditrichia	o__Calditrichales	f__Calditrichaceae	NA	NA	ASV1294
	1147	d__Bacteria	p__Firmicutes_A	c__Clostridia_258483	o__Clostridiales	f__Clostridiaceae_222000	g__Oceanirhabdus	NA	ASV1295
	1148	d__Bacteria	p__Calditrichota	c__Calditrichia	o__Calditrichales	f__Calditrichaceae	NA	NA	ASV1296
	1149	d__Bacteria	p__Proteobacteria	c__Alphaproteobacteria	o__Rhizobiales_A_504721	f__Methyloligellaceae	NA	NA	ASV1297
	1150	d__Bacteria	p__Myxococcota_A_473307	c__Polyangia_463783	o__Polyangiales	NA	NA	NA	ASV1299
	1151	d__Bacteria	p__WOR-3	c__E44-bin80	o__E44-bin80	f__E44-bin80	g__SOIS01	s__sp004375965	ASV1300
	1152	d__Bacteria	p__Proteobacteria	c__Gammaproteobacteria	o__Chromatiales_598058	f__Thioprofundaceae	NA	NA	ASV1301
	1153	d__Bacteria	p__Spirochaetota	c__Spirochaetia	o__SZUA-6	f__Bin103	g__Bin103	s__sp002238925	ASV1302
	1154	d__Bacteria	p__Desulfobacterota_I	c__Syntrophobacteria	o__Syntrophobacterales	NA	NA	NA	ASV1303
	1155	d__Bacteria	p__Cyanobacteria	c__Cyanobacteriia	o__Cyanobacteriales	NA	NA	NA	ASV1305
	1156	d__Bacteria	p__Firmicutes_A	c__Clostridia_258483	o__Peptostreptococcales	f__Peptostreptococcaceae_256921	g__Tepidibacter_A	s__mesophilus	ASV1306
	1157	d__Bacteria	p__Actinobacteriota	c__Actinomycetia	o__Actinomycetales	f__Dermatophilaceae_390796	g__Phycicoccus_A_390311	s__flavus	ASV1308
	1158	d__Bacteria	p__Acidobacteriota	c__Aminicenantia	o__Aminicenantales	f__Aminicenantaceae	NA	NA	ASV1309
	1159	d__Bacteria	p__Chloroflexota	c__Dehalococcoidia	o__Dehalococcoidales	NA	NA	NA	ASV1310
	1160	d__Bacteria	p__Bacteroidota	c__Bacteroidia	o__Bacteroidales	f__VadinHA17_874699	g__DRPN01	NA	ASV1311
	1161	d__Bacteria	p__Planctomycetota	c__Planctomycetia	o__Pirellulales	NA	NA	NA	ASV1312
	1162	d__Bacteria	p__Myxococcota_A_473307	c__UBA9160	o__UBA9160	NA	NA	NA	ASV1313
	1163	d__Bacteria	p__Chloroflexota	c__Anaerolineae	o__Anaerolineales	NA	NA	NA	ASV1315
	1164	d__Bacteria	p__Acidobacteriota	c__Vicinamibacteria	o__Vicinamibacterales	f__UBA8438	g__UBA8438	NA	ASV1316
	1165	d__Bacteria	p__Zixibacteria	c__MSB-5A5_778960	o__GN15	f__PGXB01	g__UNRQ01	s__sp900498245	ASV1317
	1166	d__Bacteria	p__Bacteroidota	c__Bacteroidia	o__Flavobacteriales_877923	f__Flavobacteriaceae	g__Mesonia_832444	s__Mesonia mobilis	ASV1318
	1167	d__Bacteria	p__Proteobacteria	c__Gammaproteobacteria	o__Enterobacterales_A_737866	f__Alteromonadaceae_665222	g__Idiomarina	s__aquatica	ASV1320
	1168	d__Bacteria	p__Proteobacteria	c__Gammaproteobacteria	o__Chromatiales_602636	f__Chromatiaceae_602636	g__Thiohalocapsa_602636	s__Thiohalocapsa halophila	ASV1323
	1169	d__Bacteria	p__Bacteroidota	c__Bacteroidia	o__Cytophagales	f__Cyclobacteriaceae_900709	g__Fulvivirga	NA	ASV1324
	1170	d__Bacteria	p__Chloroflexota	c__Dehalococcoidia	o__GIF9	f__AB-539-J10	g__E44-bin10	s__sp004377135	ASV1325
	1171	d__Bacteria	p__Actinobacteriota	c__Thermoleophilia	o__Solirubrobacterales	f__70-9	NA	NA	ASV1326
	1172	d__Bacteria	p__Desulfobacterota_I	c__Desulfobacteria	o__Desulfobacterales	f__SG8-13	g__SG8-13	s__sp001303025	ASV1327
	1173	d__Archaea	p__Thermoproteota	c__Bathyarchaeia	o__B26-1	f__UBA233	g__PALSA-986	s__sp003589585	ASV1328
	1174	d__Bacteria	p__Chloroflexota	c__Dehalococcoidia	o__UBA2979	f__UBA2979	g__VXMT01	s__sp009840945	ASV1329
	1175	d__Bacteria	p__Bacteroidota	c__Bacteroidia	o__Bacteroidales	f__UBA10428	g__JAAAOM01	NA	ASV1331
	1176	d__Bacteria	p__Calditrichota	c__Calditrichia	o__RBG-13-44-9	f__J042	g__J075	NA	ASV1332
	1177	d__Bacteria	p__Proteobacteria	c__Alphaproteobacteria	o__Geminicoccales	f__Geminicoccaceae	NA	NA	ASV1334
	1178	d__Bacteria	p__Proteobacteria	c__Alphaproteobacteria	o__Rhizobiales_A_504721	f__Methyloligellaceae	g__UBA2767	s__sp002897995	ASV1335
	1179	d__Bacteria	p__Desulfobacterota_G_459544	c__BSN033	o__B13-G15	NA	NA	NA	ASV1337
	1180	d__Bacteria	p__Proteobacteria	c__Gammaproteobacteria	o__GCA-001735895	f__GCA-001735895	g__GCA-001735895	s__sp001735895	ASV1338
	1181	d__Bacteria	p__Proteobacteria	c__Alphaproteobacteria	o__Rhizobiales_A_504721	f__Methyloligellaceae	g__Methyloceanibacter	NA	ASV1342
	1182	d__Bacteria	p__Actinobacteriota	c__Thermoleophilia	o__Miltoncostaeales	f__Miltoncostaeaceae	g__Miltoncostaea	s__marina	ASV1343
	1183	d__Bacteria	p__Proteobacteria	c__Alphaproteobacteria	o__Rhizobiales_A_504721	f__Methyloligellaceae	NA	NA	ASV1344
	1184	d__Bacteria	p__Chloroflexota	c__Anaerolineae	o__Promineofilales	f__Promineofilaceae	NA	NA	ASV1345
	1185	d__Bacteria	p__Myxococcota_A_473307	c__Polyangia_463783	o__Polyangiales	f__SG8-38	g__SG8-38	NA	ASV1346
	1186	d__Bacteria	p__Firmicutes_D	c__Bacilli	o__Bacillales_B_302584	f__DSM-18226_301387	g__Bacillus_BU	NA	ASV1347
	1187	d__Bacteria	p__Bacteroidota	c__Bacteroidia	o__Cytophagales	f__Thermonemataceae_910791	NA	NA	ASV1348
	1188	d__Bacteria	p__Actinobacteriota	c__Acidimicrobiia_402965	o__UBA5794	f__UBA5794	g__SZUA-442	s__sp003235475	ASV1349
	1189	d__Bacteria	p__Actinobacteriota	c__Acidimicrobiia_402965	o__UBA5794	f__UBA5794	g__SZUA-442	s__sp003235475	ASV1350
	1190	d__Bacteria	p__Planctomycetota	c__Planctomycetia	o__Pirellulales	f__Lacipirellulaceae	g__Pirellulimonas	s__nuda	ASV1351
	1191	d__Bacteria	p__Proteobacteria	c__Gammaproteobacteria	o__XN24	f__XN24	g__XN24	NA	ASV1352
	1192	d__Bacteria	p__Acidobacteriota	c__Thermoanaerobaculia	o__UBA5704	f__UBA5704	NA	NA	ASV1353
	1193	d__Bacteria	p__Proteobacteria	c__Alphaproteobacteria	o__Caulobacterales	f__Maricaulaceae	NA	NA	ASV1354
	1194	d__Bacteria	p__Acidobacteriota	c__UBA6911	o__UBA6911	f__UBA6911	g__Gp18-AA60	NA	ASV1357
	1195	d__Bacteria	p__Spirochaetota	c__Spirochaetia	o__SZUA-6	f__Bin103	g__Bin103	s__sp002238925	ASV1359
	1196	d__Bacteria	p__Calditrichota	c__Calditrichia	o__Calditrichales	f__Calditrichaceae	NA	NA	ASV1360
	1197	d__Bacteria	p__Acidobacteriota	c__Aminicenantia	o__Aminicenantales	f__Aminicenantaceae	NA	NA	ASV1361
	1198	d__Bacteria	p__Acidobacteriota	c__Aminicenantia	o__Aminicenantales	f__Aminicenantaceae	NA	NA	ASV1363
	1199	d__Bacteria	p__Firmicutes_A	c__Clostridia_258483	o__Eubacteriales_258471	f__Eubacteriaceae_258461	g__Rhabdanaerobium	s__thermarum	ASV1364
	1200	d__Bacteria	p__Proteobacteria	c__Alphaproteobacteria	o__Rhizobiales_A_501059	f__Rhizobiaceae_A_501059	g__Sinorhizobium	NA	ASV1365
	1201	d__Bacteria	p__Gemmatimonadota	c__Gemmatimonadetes	o__Longimicrobiales	f__UBA6960	g__PXFI01	s__sp003564295	ASV1366
	1202	d__Bacteria	p__Chloroflexota	c__Anaerolineae	o__Ardenticatenales	f__Ardenticatenaceae	g__Ardenticatena	NA	ASV1367
	1203	d__Bacteria	p__Calditrichota	c__Calditrichia	o__RBG-13-44-9	f__J042	g__J075	NA	ASV1368
	1204	d__Archaea	p__Thermoproteota	c__Bathyarchaeia	o__B26-1	f__BA1	g__BA2	s__sp001399795	ASV1370
	1205	d__Bacteria	p__Gemmatimonadota	c__Gemmatimonadetes	o__Longimicrobiales	f__UBA6960	NA	NA	ASV1371
	1206	d__Bacteria	p__Proteobacteria	c__Alphaproteobacteria	NA	NA	NA	NA	ASV1372
	1207	d__Bacteria	p__Bacteroidota	c__Bacteroidia	o__Bacteroidales	f__VadinHA17_874699	g__HyVt-105	NA	ASV1376
	1208	d__Archaea	p__Thermoproteota	c__Bathyarchaeia	o__TCS64	f__TCS64	g__GCA-2726865	s__sp002726865	ASV1377
	1209	d__Archaea	p__Thermoplasmatota	c__E2	o__DHVEG-1	f__DHVEG-1	g__SM1-50	s__sp002496355	ASV1378
	1210	d__Bacteria	p__Proteobacteria	c__Alphaproteobacteria	NA	NA	NA	NA	ASV1379
	1211	d__Bacteria	p__Proteobacteria	c__Alphaproteobacteria	o__Micropepsales	NA	NA	NA	ASV1381
	1212	d__Bacteria	p__Proteobacteria	c__Gammaproteobacteria	NA	NA	NA	NA	ASV1382
	1213	d__Bacteria	p__Proteobacteria	c__Gammaproteobacteria	o__DSM-26407	f__DSM-26407	g__Thioalbus	NA	ASV1383
	1214	d__Bacteria	p__Deinococcota	c__Deinococci	o__Deinococcales	f__Trueperaceae	g__CSSed10-48	s__sp007695125	ASV1384
	1215	d__Bacteria	p__Chloroflexota	c__Dehalococcoidia	o__Dehalococcoidales	NA	NA	NA	ASV1385
	1216	d__Bacteria	p__Desulfobacterota_D	c__UBA1144	o__RKRQ01	f__RKRQ01	g__RKRQ01	NA	ASV1389
	1217	d__Bacteria	p__Acidobacteriota	c__Mor1	o__Mor1	f__Mor1	g__Mor1	NA	ASV1390
	1218	d__Bacteria	p__Proteobacteria	c__Gammaproteobacteria	o__Pseudomonadales_637066	f__Oleiphilaceae_637066	g__Marinobacter_A_637054	s__santoriniensis	ASV1392
	1219	d__Bacteria	p__Firmicutes_D	c__Bacilli	o__Bacillales_D_310495	f__Halobacillaceae	g__Pontibacillus_A	s__marinus	ASV1393
	1220	d__Bacteria	p__Actinobacteriota	c__Acidimicrobiia_401430	o__Acidimicrobiales	f__UBA8139	g__Rhabdothermincola	s__sediminis	ASV1395
	1221	d__Bacteria	p__Proteobacteria	c__Gammaproteobacteria	o__Chromatiales_602909	f__Chromatiaceae_602909	NA	NA	ASV1396
	1222	d__Bacteria	p__Firmicutes_A	c__Clostridia_258483	o__Eubacteriales_258471	f__Eubacteriaceae_258461	g__Rhabdanaerobium	s__thermarum	ASV1397
	1223	d__Archaea	p__Thermoproteota	c__Bathyarchaeia	o__B26-1	f__BA1	g__BA2	s__sp001399795	ASV1398
	1224	d__Bacteria	p__Chloroflexota	c__Dehalococcoidia	NA	NA	NA	NA	ASV1399
	1225	d__Bacteria	p__Chloroflexota	c__Dehalococcoidia	o__DSTF01	f__WHTK01	g__WHTK01	s__sp009377745	ASV1400
	1226	d__Bacteria	p__Calditrichota	c__Calditrichia	o__Calditrichales	f__Calditrichaceae	NA	NA	ASV1401
	1227	d__Bacteria	p__Bacteroidota	c__Bacteroidia	o__Cytophagales	f__Thermonemataceae_910791	NA	NA	ASV1402
	1228	d__Bacteria	p__Chloroflexota	c__Limnocylindria	o__Limnocylindrales	f__CSP1-4	g__GWC2-73-18	NA	ASV1403
	1229	d__Bacteria	p__Myxococcota_A_473307	c__Polyangia_463783	o__Polyangiales	f__SLQV01	g__SLQV01	s__sp007131285	ASV1404
	1230	d__Bacteria	p__Proteobacteria	c__Gammaproteobacteria	NA	NA	NA	NA	ASV1405
	1231	d__Bacteria	p__Bdellovibrionota_E	c__Bacteriovoracia	o__Bacteriovoracales	f__Bacteriovoracaceae	g__M0603	NA	ASV1406
	1232	d__Bacteria	p__Proteobacteria	c__Gammaproteobacteria	o__Thiomicrospirales	f__Thiomicrospiraceae	g__Thiomicrorhabdus	s__xiamenensis	ASV1407
	1233	d__Bacteria	p__Acidobacteriota	c__UBA6911	o__UBA6911	f__UBA6911	g__Gp18-AA60	s__sp003225335	ASV1408
	1234	d__Bacteria	p__Gemmatimonadota	c__Gemmatimonadetes	o__KS3-K002	f__JABDQB01	g__JAAXHJ01	s__sp009838765	ASV1409
	1235	d__Archaea	p__Nanoarchaeota	c__Nanoarchaeia	o__Pacearchaeales	f__GW2011-AR1	g__BMS3ABIN17	s__sp002897655	ASV1411
	1236	d__Bacteria	p__Proteobacteria	c__Alphaproteobacteria	NA	NA	NA	NA	ASV1412
	1237	d__Bacteria	p__Patescibacteria	c__Paceibacteria	o__UBA6257	f__2-01-FULL-56-20	g__SURF-56	s__sp003599135	ASV1413
	1238	d__Bacteria	p__Myxococcota_A_473307	c__UBA9160	o__UBA9160	f__UBA6930	g__DSOP01	s__sp011055735	ASV1414
	1239	d__Bacteria	p__Bacteroidota	c__Rhodothermia	o__Balneolales	f__Balneolaceae	NA	NA	ASV1415
	1240	d__Bacteria	p__Planctomycetota	c__Phycisphaerae	o__UBA1845	f__UBA1845	NA	NA	ASV1418
	1241	d__Bacteria	p__Firmicutes_D	c__Bacilli	o__Paenibacillales	f__NBRC-103111	g__Paenibacillus_H	NA	ASV1419
	1242	d__Bacteria	p__Desulfobacterota_I	c__DSM-4660	o__Desulfatiglandales	NA	NA	NA	ASV1420
	1243	d__Bacteria	p__Bacteroidota	c__Bacteroidia	o__Bacteroidales	f__UBA10428	g__JAAAOM01	NA	ASV1423
	1244	d__Bacteria	p__Desulfobacterota_I	c__DSM-4660	o__Desulfatiglandales	f__Desulfatiglandaceae	g__UBA5623	NA	ASV1424
	1245	d__Bacteria	p__Chloroflexota	c__Dehalococcoidia	o__Dehalococcoidales	f__W498	g__W498	NA	ASV1425
	1246	d__Bacteria	p__Bacteroidota	c__Bacteroidia	o__Bacteroidales	f__VadinHA17_874699	g__HyVt-105	NA	ASV1427
	1247	d__Bacteria	p__Myxococcota_A_473307	c__UBA9160	o__UBA9160	NA	NA	NA	ASV1428
	1248	d__Bacteria	p__Planctomycetota	c__Planctomycetia	o__Pirellulales	f__Lacipirellulaceae	g__Pirellulimonas	s__nuda	ASV1429
	1249	d__Bacteria	p__Spirochaetota	c__Spirochaetia	o__DSM-16054	f__Sediminispirochaetaceae	g__DSBN01	s__sp011046055	ASV1430
	1250	d__Bacteria	p__Chloroflexota	c__Dehalococcoidia	o__Dehalococcoidales	NA	NA	NA	ASV1431
	1251	d__Bacteria	p__Bacteroidota	c__Bacteroidia	o__Bacteroidales	f__GCA-2748055	g__GCA-2748055	NA	ASV1432
	1252	d__Bacteria	p__Proteobacteria	c__Alphaproteobacteria	o__Rhodobacterales	f__Rhodobacteraceae	g__Albimonas	s__donghaensis	ASV1433
	1253	d__Bacteria	p__Desulfobacterota_I	c__Desulfobaccia	o__Desulfobaccales	f__Desulfobaccaceae	g__Desulfobacca	NA	ASV1434
	1254	d__Bacteria	p__Proteobacteria	c__Gammaproteobacteria	NA	NA	NA	NA	ASV1436
	1255	d__Bacteria	p__Bacteroidota	c__Bacteroidia	o__Bacteroidales	f__GCA-2748055	g__GCA-2748055	NA	ASV1437
	1256	d__Bacteria	p__Acidobacteriota	c__Vicinamibacteria	o__Vicinamibacterales	f__SCN-69-37	g__SCN-69-37	s__sp001724025	ASV1439
	1257	d__Bacteria	p__Firmicutes_F	c__Halanaerobiia	o__Halanaerobiales	f__Halanaerobiaceae_43036	g__Halocella_43036	s__Halocella cellulosilytica	ASV1440
	1258	d__Bacteria	p__Acidobacteriota	c__Mor1	o__Mor1	f__Mor1	g__Mor1	NA	ASV1441
	1259	d__Bacteria	p__Firmicutes_A	c__Clostridia_258483	o__Acetivibrionales	f__DSM-8532	NA	NA	ASV1443
	1260	d__Bacteria	p__Firmicutes_D	c__Bacilli	o__Paenibacillales	NA	NA	NA	ASV1444
	1261	d__Bacteria	p__Marinisomatota	c__Marinisomatia	o__SCGC-AAA003-L08	f__TS1B11	g__TS1B11	s__sp004124295	ASV1447
	1262	d__Bacteria	p__Zixibacteria	c__MSB-5A5_778960	o__JAABVY01	f__JAABVY01	g__JAABVY01	s__sp011056555	ASV1448
	1263	d__Bacteria	p__Spirochaetota	c__Spirochaetia	o__SZUA-6	f__Bin103	g__Bin103	s__sp002238925	ASV1449
	1264	d__Bacteria	p__Proteobacteria	c__Gammaproteobacteria	NA	NA	NA	NA	ASV1450
	1265	d__Bacteria	p__Desulfobacterota_I	c__DSM-4660	o__Desulfatiglandales	NA	NA	NA	ASV1452
	1266	d__Bacteria	p__Acidobacteriota	c__Acidobacteriae	o__Bryobacterales	f__Bryobacteraceae	NA	NA	ASV1457
	1267	d__Bacteria	p__Proteobacteria	c__Gammaproteobacteria	o__Methylococcales	f__Methylothermaceae	NA	NA	ASV1458
	1268	d__Archaea	p__Thermoproteota	c__Bathyarchaeia	o__B26-1	f__BA1	g__BA2	s__sp001399795	ASV1459
	1269	d__Bacteria	p__Chloroflexota	c__Dehalococcoidia	o__Dehalococcoidales	NA	NA	NA	ASV1460
	1270	d__Bacteria	p__Gemmatimonadota	c__Gemmatimonadetes	o__Longimicrobiales	f__UBA6960	NA	NA	ASV1461
	1271	d__Bacteria	p__Chloroflexota	c__Dehalococcoidia	o__DSTF01	f__WHTK01	g__WHTK01	s__sp009377745	ASV1462
	1272	d__Bacteria	p__Acidobacteriota	c__Acidobacteriae	o__UBA7540	f__UBA7540	NA	NA	ASV1463
	1273	d__Bacteria	p__Proteobacteria	c__Alphaproteobacteria	o__Geminicoccales	f__Geminicoccaceae	NA	NA	ASV1465
	1274	d__Bacteria	p__Proteobacteria	c__Gammaproteobacteria	NA	NA	NA	NA	ASV1466
	1275	d__Bacteria	p__Gemmatimonadota	c__Gemmatimonadetes	o__KS3-K002	f__JABDQB01	g__JAAXHJ01	s__sp009838765	ASV1467
	1276	d__Bacteria	p__Zixibacteria	c__MSB-5A5_778960	o__JAABVY01	f__JAABVY01	g__JAABVY01	s__sp011056555	ASV1468
	1277	d__Bacteria	p__Desulfobacterota_I	c__DSM-4660	o__Desulfatiglandales	f__Desulfatiglandaceae	g__B111-G9	s__sp011042035	ASV1469
	1278	d__Bacteria	p__Patescibacteria	c__ABY1	NA	NA	NA	NA	ASV1470
	1279	d__Bacteria	p__Spirochaetota	c__Spirochaetia	o__JC444	f__Marispirochaetaceae	NA	NA	ASV1473
	1280	d__Bacteria	p__Proteobacteria	c__Gammaproteobacteria	o__Burkholderiales_597441	f__UBA3031	g__UBA3031	NA	ASV1475
	1281	d__Bacteria	p__Bacteroidota	c__Ignavibacteria	o__Ignavibacteriales	f__Ignavibacteriaceae_785640	NA	NA	ASV1477
	1282	d__Bacteria	p__Acidobacteriota	c__Acidobacteriae	o__UBA7540	f__UBA7540	g__SCRD01	s__sp004298155	ASV1478
	1283	d__Bacteria	p__Desulfobacterota_I	c__Desulfobacteria	o__Desulfobacterales	f__UBA11574	g__S5133MH16	s__sp004193595	ASV1479
	1284	d__Bacteria	p__Myxococcota_A_473307	c__UBA9160	o__UBA9160	NA	NA	NA	ASV1480
	1285	d__Bacteria	p__Chloroflexota	c__Anaerolineae	o__B4-G1	f__DUEL01	g__SpSt-77	NA	ASV1481
	1286	d__Bacteria	p__Bacteroidota	c__Bacteroidia	o__Bacteroidales	f__GCA-2748055	g__GCA-2748055	NA	ASV1483
	1287	d__Bacteria	p__Desulfobacterota_I	c__DSM-4660	o__Desulfatiglandales	f__Desulfatiglandaceae	g__UBA5623	NA	ASV1484
	1288	d__Bacteria	p__Tectomicrobia	c__Entotheonellia	o__Entotheonellales	f__Entotheonellaceae	g__Entotheonella	s__factor	ASV1485
	1289	d__Bacteria	p__Chloroflexota	c__Anaerolineae	o__Anaerolineales	NA	NA	NA	ASV1486
	1290	d__Bacteria	p__Myxococcota_A_473307	c__Bradymonadia	o__Bradymonadales	f__Bradymonadaceae	g__V1718	NA	ASV1487
	1291	d__Bacteria	p__Bacteroidota	c__Rhodothermia	o__Balneolales	f__Balneolaceae	NA	NA	ASV1489
	1292	d__Bacteria	p__Desulfobacterota_D	c__UBA1144	o__UBA2774	f__CSP1-2	g__HRBIN37	s__sp002898375	ASV1492
	1293	d__Bacteria	p__Gemmatimonadota	c__Gemmatimonadetes	NA	NA	NA	NA	ASV1493
	1294	d__Bacteria	p__Proteobacteria	c__Gammaproteobacteria	o__Xanthomonadales_616050	f__SZUA-36	NA	NA	ASV1494
	1295	d__Bacteria	p__Bacteroidota	c__Bacteroidia	o__Bacteroidales	f__GCA-2748055	g__GCA-2748055	s__sp011056635	ASV1495
	1296	d__Bacteria	p__Acidobacteriota	c__Aminicenantia	o__Aminicenantales	f__Aminicenantaceae	NA	NA	ASV1496
	1297	d__Bacteria	p__Chloroflexota	c__Dehalococcoidia	o__Dehalococcoidales	f__W498	g__W498	NA	ASV1497
	1298	d__Archaea	p__Nanoarchaeota	c__Nanoarchaeia	o__Pacearchaeales	f__GW2011-AR1	g__BMS3ABIN17	s__sp002897655	ASV1498
	1299	d__Bacteria	p__Actinobacteriota	c__Thermoleophilia	o__Solirubrobacterales	f__70-9	g__VAYN01	s__sp005885405	ASV1501
	1300	d__Bacteria	p__Actinobacteriota	c__Actinomycetia	o__Mycobacteriales	NA	NA	NA	ASV1502
	1301	d__Bacteria	p__Proteobacteria	c__Alphaproteobacteria	o__Sphingomonadales	f__Sphingomonadaceae	g__Alteraurantiacibacter	NA	ASV1507
	1302	d__Bacteria	p__Proteobacteria	c__Alphaproteobacteria	o__Rhizobiales_A_504723	NA	NA	NA	ASV1508
	1303	d__Bacteria	p__Firmicutes_A	c__Clostridia_258483	o__Peptostreptococcales	f__Caminicellaceae	NA	NA	ASV1509
	1304	d__Bacteria	p__Proteobacteria	c__Gammaproteobacteria	NA	NA	NA	NA	ASV1510
	1305	d__Bacteria	p__Bacteroidota	c__Bacteroidia	o__Flavobacteriales_877923	f__Flavobacteriaceae	g__Gramella	NA	ASV1511
	1306	d__Bacteria	p__Proteobacteria	c__Alphaproteobacteria	NA	NA	NA	NA	ASV1514
	1307	d__Bacteria	p__KSB1	c__UBA2214	o__CR04bin15	f__CR04bin15	g__N075bin58	s__sp004356825	ASV1515
	1308	d__Bacteria	p__Proteobacteria	c__Gammaproteobacteria	o__Methylococcales	f__Methylothermaceae	NA	NA	ASV1516
	1309	d__Bacteria	p__Planctomycetota	c__Planctomycetia	o__Pirellulales	f__PALSA-1355	g__PALSA-1355	s__sp003153375	ASV1517
	1310	d__Bacteria	p__Proteobacteria	c__Alphaproteobacteria	o__Rhizobiales_A_504705	f__Xanthobacteraceae_503485	NA	NA	ASV1518
	1311	d__Bacteria	p__Desulfobacterota_G_459546	c__Desulfuromonadia	o__Desulfuromonadales	f__Syntrophotaleaceae_438131	g__Syntrophotalea_A	s__carbinolica	ASV1520
	1312	d__Bacteria	p__Bacteroidota	c__Bacteroidia	o__Bacteroidales	f__UBA10428	g__JAAAOM01	NA	ASV1522
	1313	d__Bacteria	p__Chloroflexota	c__Dehalococcoidia	o__Dehalococcoidales	NA	NA	NA	ASV1523
	1314	d__Bacteria	p__Desulfobacterota_D	c__UBA1144	o__UBA2774	f__CSP1-2	g__HRBIN37	s__sp002898375	ASV1525
	1315	d__Bacteria	p__Gemmatimonadota	c__Gemmatimonadetes	o__Longimicrobiales	f__UBA6960	NA	NA	ASV1527
	1316	d__Bacteria	p__Chloroflexota	c__Anaerolineae	o__Anaerolineales	f__Anaerolineaceae_409200	g__Pelolinea	s__submarina	ASV1528
	1317	d__Bacteria	p__Acidobacteriota	c__Aminicenantia	o__Aminicenantales	f__Aminicenantaceae	NA	NA	ASV1529
	1318	d__Bacteria	p__Proteobacteria	c__Gammaproteobacteria	o__Woeseiales	f__Woeseiaceae	g__SP4260	NA	ASV1530
	1319	d__Bacteria	p__Desulfobacterota_I	c__Desulfobacteria	o__Desulfobacterales	f__SG8-13	g__SG8-13	s__sp001303025	ASV1531
	1320	d__Bacteria	p__Proteobacteria	c__Alphaproteobacteria	o__Rhizobiales_A_501396	f__Rhizobiaceae_A_499470	NA	NA	ASV1532
	1321	d__Bacteria	p__Desulfobacterota_D	c__UBA1144	o__UBA2774	f__CSP1-2	g__HRBIN37	s__sp002898375	ASV1533
	1322	d__Bacteria	p__Proteobacteria	c__Gammaproteobacteria	o__QQUJ01	f__QQUJ01	g__QQUJ01	NA	ASV1534
	1323	d__Bacteria	p__Firmicutes_D	c__Bacilli	o__Tepidibacillales	f__Tepidibacillaceae	NA	NA	ASV1536
	1324	d__Bacteria	p__Planctomycetota	NA	NA	NA	NA	NA	ASV1537
	1325	d__Bacteria	p__Spirochaetota	c__Spirochaetia	o__SZUA-6	f__Bin103	g__Bin103	s__sp002238925	ASV1538
	1326	d__Bacteria	p__Desulfobacterota_I	c__DSM-4660	o__Desulfatiglandales	f__Desulfatiglandaceae	g__UBA5623	s__sp900258555	ASV1540
	1327	d__Bacteria	p__Proteobacteria	c__Gammaproteobacteria	NA	NA	NA	NA	ASV1541
	1328	d__Bacteria	p__Krumholzibacteriota	c__Krumholzibacteria	o__LZORAL124-64-63	f__LZORAL124-64-63	NA	NA	ASV1542
	1329	d__Bacteria	p__Bacteroidota	c__Bacteroidia	o__Flavobacteriales_877923	f__Flavobacteriaceae	g__Muricauda_A_821778	s__lutimaris	ASV1543
	1330	d__Bacteria	p__Proteobacteria	c__Alphaproteobacteria	o__Geminicoccales	f__Geminicoccaceae	g__JAAAPF01	s__sp009908425	ASV1544
	1331	d__Bacteria	p__Chloroflexota	c__Anaerolineae	o__Anaerolineales	f__Anaerolineaceae_409200	g__Pelolinea	s__submarina	ASV1545
	1332	d__Bacteria	p__Bacteroidota	c__Bacteroidia	o__Bacteroidales	f__GCA-2748055	g__GCA-2748055	s__sp011056635	ASV1546
	1333	d__Bacteria	p__Proteobacteria	c__Gammaproteobacteria	NA	NA	NA	NA	ASV1547
	1334	d__Bacteria	p__Proteobacteria	c__Alphaproteobacteria	o__Kiloniellales	f__DSM-21159	NA	NA	ASV1550
	1335	d__Bacteria	p__Proteobacteria	c__Gammaproteobacteria	o__Pseudomonadales_650612	f__Cellvibrionaceae	g__Pseudomaricurvus	s__hydrocarbonicus	ASV1554
	1336	d__Bacteria	p__Myxococcota_A_473307	c__UBA9160	o__UBA9160	NA	NA	NA	ASV1556
	1337	d__Bacteria	p__Acidobacteriota	c__Thermoanaerobaculia	o__Thermoanaerobaculales	NA	NA	NA	ASV1557
	1338	d__Bacteria	p__Gemmatimonadota	c__Gemmatimonadetes	o__KS3-K002	f__JABDQB01	g__JAAXHJ01	s__sp009838765	ASV1559
	1339	d__Bacteria	p__Proteobacteria	c__Alphaproteobacteria	o__Rhodobacterales	f__Rhodobacteraceae	NA	NA	ASV1560
	1340	d__Bacteria	p__Deinococcota	c__Deinococci	o__Deinococcales	f__Trueperaceae	g__JAABTL01	s__sp011390735	ASV1562
	1341	d__Archaea	p__Thermoproteota	c__Bathyarchaeia	o__B26-1	f__UBA233	g__PALSA-986	NA	ASV1563
	1342	d__Bacteria	p__Proteobacteria	c__Alphaproteobacteria	NA	NA	NA	NA	ASV1565
	1343	d__Bacteria	p__Chloroflexota	c__Anaerolineae	o__Anaerolineales	f__EnvOPS12	NA	NA	ASV1566
	1344	d__Archaea	p__Thermoproteota	c__Bathyarchaeia	o__TCS64	f__TCS64	g__GCA-2726865	s__sp002726865	ASV1567
	1345	d__Bacteria	p__Actinobacteriota	c__Thermoleophilia	o__Gaiellales	f__Gaiellaceae	g__Palsa-739	s__sp003139545	ASV1568
	1346	d__Bacteria	p__Proteobacteria	c__Gammaproteobacteria	o__Woeseiales	f__Woeseiaceae	g__SP4260	NA	ASV1569
	1347	d__Bacteria	p__Actinobacteriota	c__Actinomycetia	o__Mycobacteriales	f__Mycobacteriaceae	g__Mycobacterium	NA	ASV1570
	1348	d__Bacteria	p__Proteobacteria	c__Alphaproteobacteria	NA	NA	NA	NA	ASV1571
	1349	d__Bacteria	p__Chloroflexota	c__Anaerolineae	o__Anaerolineales	NA	NA	NA	ASV1572
	1350	d__Bacteria	p__Planctomycetota	c__Brocadiae	o__Brocadiales	NA	NA	NA	ASV1573
	1351	d__Bacteria	p__Bacteroidota	c__Bacteroidia	NA	NA	NA	NA	ASV1574
	1352	d__Bacteria	p__Bacteroidota	c__Kapabacteria	o__OLB7	f__OLB7	g__OLB7	s__sp001567195	ASV1575
	1353	d__Bacteria	p__Zixibacteria	c__MSB-5A5_778960	o__GN15	f__PGXB01	NA	NA	ASV1577
	1354	d__Bacteria	p__Planctomycetota	c__Brocadiae	o__SM23-32	f__SM23-32	g__JAAYEJ01	s__sp012728835	ASV1579
	1355	d__Bacteria	p__Chloroflexota	c__Anaerolineae	o__Anaerolineales	f__UBA11858	g__B10-G9	s__sp003648195	ASV1581
	1356	d__Archaea	p__Thermoproteota	c__Bathyarchaeia	o__B26-1	f__BA1	g__BA2	s__sp001399795	ASV1583
	1357	d__Bacteria	p__Proteobacteria	c__Gammaproteobacteria	o__VBWC01	f__VBWC01	g__VBWC01	s__sp006218035	ASV1584
	1358	d__Bacteria	p__Proteobacteria	c__Gammaproteobacteria	o__Enterobacterales_A_737866	f__Vibrionaceae	g__Vibrio_678715	NA	ASV1585
	1359	d__Bacteria	p__Proteobacteria	c__Gammaproteobacteria	o__Enterobacterales_A_737866	f__Vibrionaceae	g__Vibrio_678715	s__Vibrio alginolyticus_673799	ASV1587
	1360	d__Bacteria	p__WOR-3	c__UBA3072	o__UBA3072	f__B12-G15	g__DTHG01	NA	ASV1590
	1361	d__Bacteria	p__Proteobacteria	c__Alphaproteobacteria	o__Rhizobiales_A_504721	f__Methyloligellaceae	g__UBA2767	s__sp002897995	ASV1591
	1362	d__Bacteria	p__Desulfobacterota_I	c__Syntrophobacteria	o__Syntrophobacterales	NA	NA	NA	ASV1592
	1363	d__Bacteria	p__Actinobacteriota	NA	NA	NA	NA	NA	ASV1594
	1364	d__Bacteria	p__Proteobacteria	c__Alphaproteobacteria	o__Kiloniellales	NA	NA	NA	ASV1595
	1365	d__Bacteria	p__Proteobacteria	c__Alphaproteobacteria	o__Rhodospirillales_505895	f__2-12-FULL-67-15	g__2-12-FULL-67-15	NA	ASV1596
	1366	d__Bacteria	p__Acidobacteriota	c__Vicinamibacteria	o__Bin61	f__SMYC01	g__SMYC01	s__sp004356105	ASV1598
	1367	d__Bacteria	p__Chloroflexota	c__Dehalococcoidia	NA	NA	NA	NA	ASV1599
	1368	d__Archaea	p__Nanoarchaeota	c__Nanoarchaeia	o__Pacearchaeales	f__GW2011-AR1	g__BMS3ABIN17	s__sp002897655	ASV1602
	1369	d__Bacteria	p__Campylobacterota	c__Campylobacteria	o__Campylobacterales	f__Arcobacteraceae	NA	NA	ASV1603
	1370	d__Bacteria	p__Proteobacteria	c__Gammaproteobacteria	o__Enterobacterales_A_737866	f__Vibrionaceae	g__Vibrio_678715	s__Vibrio rumoiensis	ASV1604
	1371	d__Bacteria	p__Firmicutes_A	c__Clostridia_258483	o__Tissierellales	f__MES13	g__MES13	s__sp009711785	ASV1607
	1372	d__Bacteria	p__Proteobacteria	c__Alphaproteobacteria	o__Rhizobiales_A_504721	f__Methyloligellaceae	NA	NA	ASV1614
	1373	d__Bacteria	p__Proteobacteria	c__Gammaproteobacteria	o__Pseudomonadales_650612	f__Halieaceae	g__Pseudohaliea	NA	ASV1615
	1374	d__Bacteria	p__Acidobacteriota	c__Aminicenantia	o__Aminicenantales	f__Aminicenantaceae	NA	NA	ASV1616
	1375	d__Bacteria	p__Myxococcota_A_473307	c__UBA9160	o__UBA9160	f__PR03	g__CAADGG01	s__sp900696485	ASV1617
	1376	d__Bacteria	p__Proteobacteria	c__Gammaproteobacteria	o__QQUJ01	f__QQUJ01	g__QQUJ01	NA	ASV1621
	1377	d__Bacteria	p__Planctomycetota	c__Planctomycetia	o__Planctomycetales	f__Planctomycetaceae	g__DSVQ01	NA	ASV1623
	1378	d__Bacteria	p__Chloroflexota	c__Dehalococcoidia	o__UBA6926	f__UBA6926	g__VXMO01	s__sp009841045	ASV1624
	1379	d__Bacteria	p__Chloroflexota	c__Dehalococcoidia	o__Dehalococcoidales	f__UBA2162	g__MGML01	s__sp001796415	ASV1626
	1380	d__Bacteria	p__Planctomycetota	c__Planctomycetia	o__Planctomycetales	f__Mal52	g__Symmachiella	s__dynata	ASV1627
	1381	d__Bacteria	p__Proteobacteria	c__Gammaproteobacteria	o__Enterobacterales_A_737866	f__Vibrionaceae	g__Vibrio_678715	s__Vibrio agarilyticus	ASV1628
	1382	d__Bacteria	p__Proteobacteria	c__Alphaproteobacteria	o__Micropepsales	NA	NA	NA	ASV1631
	1383	d__Bacteria	p__Acidobacteriota	c__Thermoanaerobaculia	o__UBA5704	f__UBA5704	NA	NA	ASV1634
	1384	d__Bacteria	p__Nitrospirota_A_437815	c__Thermodesulfovibrionia	o__Thermodesulfovibrionales	f__SM23-35	g__0-14-3-00-41-53	s__sp002780895	ASV1635
	1385	d__Bacteria	p__Firmicutes_F	c__Halanaerobiia	o__Halanaerobiales	NA	NA	NA	ASV1636
	1386	d__Bacteria	p__Actinobacteriota	c__Acidimicrobiia_402965	o__UBA5794	f__UBA5794	g__SZUA-442	s__sp003235475	ASV1638
	1387	d__Bacteria	p__Bacteroidota	c__Bacteroidia	o__Bacteroidales	f__GCA-2748055	g__GCA-2748055	s__sp011056635	ASV1639
	1388	d__Bacteria	p__Chloroflexota	c__Dehalococcoidia	o__Dehalococcoidales	f__W498	g__W498	NA	ASV1640
	1389	d__Bacteria	p__Chloroflexota	c__Anaerolineae	NA	NA	NA	NA	ASV1641
	1390	d__Bacteria	p__Planctomycetota	c__Planctomycetia	o__Pirellulales	f__Lacipirellulaceae	NA	NA	ASV1642
	1391	d__Bacteria	p__Zixibacteria	c__MSB-5A5_778960	NA	NA	NA	NA	ASV1643
	1392	d__Bacteria	p__Chloroflexota	c__Dehalococcoidia	o__Dehalococcoidales	f__W498	g__W498	NA	ASV1644
	1393	d__Bacteria	p__Desulfobacterota_I	c__Desulfobaccia	o__Desulfobaccales	f__Desulfobaccaceae	g__Desulfobacca	NA	ASV1645
	1394	d__Bacteria	p__Patescibacteria	c__Paceibacteria	o__UBA6257	f__2-01-FULL-56-20	g__SURF-56	s__sp003599135	ASV1647
	1395	d__Bacteria	p__Desulfobacterota_G_459546	c__Desulfuromonadia	o__Desulfuromonadales	NA	NA	NA	ASV1648
	1396	d__Bacteria	p__Spirochaetota	c__Spirochaetia	o__SZUA-6	f__Bin103	g__Bin103	s__sp002238925	ASV1649
	1397	d__Bacteria	p__Gemmatimonadota	c__Gemmatimonadetes	o__Gemmatimonadales	f__GWC2-71-9	g__HRBIN33	NA	ASV1653
	1398	d__Archaea	p__Asgardarchaeota	c__Lokiarchaeia	o__CR-4	f__SOKP01	g__SDNM01	s__sp004524535	ASV1655
	1399	d__Bacteria	p__Planctomycetota	c__Phycisphaerae	o__UBA1845	f__Fen-1342	g__JAAYXS01	NA	ASV1656
	1400	d__Bacteria	p__Acidobacteriota	c__Acidobacteriae	o__UBA7540	f__UBA7540	NA	NA	ASV1657
	1401	d__Bacteria	p__Acidobacteriota	c__Acidobacteriae	o__Acidoferrales	f__UBA7541	g__DSGC01	s__sp011056285	ASV1658
	1402	d__Bacteria	p__Chloroflexota	c__Dehalococcoidia	o__Dehalococcoidales	f__W498	g__W498	NA	ASV1660
	1403	d__Bacteria	p__Bacteroidota	c__Bacteroidia	o__Bacteroidales	f__VadinHA17_874699	g__DRPN01	NA	ASV1661
	1404	d__Bacteria	p__Acidobacteriota	c__Vicinamibacteria	o__Bin61	f__SMYC01	g__SMYC01	s__sp004356105	ASV1662
	1405	d__Bacteria	p__Proteobacteria	c__Alphaproteobacteria	o__Kiloniellales	f__CECT-8803	g__Limibacillus	s__halophilus	ASV1663
	1406	d__Bacteria	p__Chloroflexota	c__Anaerolineae	o__Anaerolineales	f__UBA4823	g__NAK19	s__sp003327455	ASV1664
	1407	d__Bacteria	p__Firmicutes_D	c__Bacilli	o__Paenibacillales	NA	NA	NA	ASV1665
	1408	d__Bacteria	p__Chloroflexota	c__Dehalococcoidia	o__RBG-13-53-26	f__RBG-13-53-26	g__B9-G15	NA	ASV1666
	1409	d__Bacteria	p__Desulfobacterota_I	NA	NA	NA	NA	NA	ASV1667
	1410	d__Bacteria	p__Acidobacteriota	c__Mor1	o__Mor1	f__Mor1	g__Mor1	NA	ASV1668
	1411	d__Bacteria	p__Desulfobacterota_I	c__Desulfobacteria	o__Desulfobacterales	f__SG8-13	g__SG8-13	s__sp001303025	ASV1670
	1412	d__Bacteria	p__Firmicutes_D	c__Bacilli	o__Bacillales_D_310495	f__Halobacillaceae	g__Pontibacillus_A	s__yanchengensis	ASV1671
	1413	d__Bacteria	p__Proteobacteria	c__Alphaproteobacteria	NA	NA	NA	NA	ASV1672
	1414	d__Archaea	p__Nanoarchaeota	c__Nanoarchaeia	o__Pacearchaeales	f__GW2011-AR1	g__BMS3ABIN17	s__sp002897655	ASV1673
	1415	d__Bacteria	p__Firmicutes_D	c__Bacilli	o__Tepidibacillales	f__Tepidibacillaceae	g__Vulcanibacillus	NA	ASV1675
	1416	d__Bacteria	p__Desulfobacterota_I	c__DSM-4660	o__Desulfatiglandales	f__HGW-15	NA	NA	ASV1676
	1417	d__Bacteria	p__Proteobacteria	c__Gammaproteobacteria	NA	NA	NA	NA	ASV1677
	1418	d__Bacteria	p__Proteobacteria	c__Gammaproteobacteria	o__Pseudomonadales_650611	f__Pseudomonadaceae	g__Pseudomonas_E_647464	NA	ASV1678
	1419	d__Bacteria	p__Desulfobacterota_I	c__Desulfobacteria	o__C00003060	f__C00003060	g__S7086C20	NA	ASV1679
	1420	d__Bacteria	p__Chloroflexota	c__Anaerolineae	o__B4-G1	f__SLSP01	g__PWVB01	s__sp007125545	ASV1681
	1421	d__Bacteria	p__Desulfobacterota_I	c__DSM-4660	o__Desulfatiglandales	f__HGW-15	NA	NA	ASV1683
	1422	d__Bacteria	p__Proteobacteria	c__Gammaproteobacteria	o__Enterobacterales_A_737866	f__Vibrionaceae	g__Vibrio_678715	s__Vibrio rumoiensis	ASV1684
	1423	d__Bacteria	p__Bacteroidota	c__Rhodothermia	o__Balneolales	f__Balneolaceae	NA	NA	ASV1685
	1424	d__Bacteria	p__Desulfobacterota_I	c__Syntrophobacteria	o__Syntrophobacterales	NA	NA	NA	ASV1686
	1425	d__Bacteria	p__Myxococcota_A_473307	c__UBA9160	o__UBA9160	f__UBA4427	NA	NA	ASV1687
	1426	d__Bacteria	p__Firmicutes_A	c__Clostridia_258483	o__Lachnospirales	f__Lachnospiraceae	g__Lachnotalea	s__glycerini	ASV1688
	1427	d__Bacteria	p__Chloroflexota	c__Dehalococcoidia	o__SM23-28-2	f__HRbin24	NA	NA	ASV1690
	1428	d__Bacteria	p__Acidobacteriota	c__Vicinamibacteria	o__Vicinamibacterales	f__SCN-69-37	g__SCN-69-37	s__sp001724025	ASV1692
	1429	d__Bacteria	p__Actinobacteriota	c__Acidimicrobiia_401430	o__Acidimicrobiales	f__SKKL01	g__Actinomarinicola	s__tropica	ASV1693
	1430	d__Bacteria	p__Chloroflexota	c__Anaerolineae	o__B4-G1	f__DUEL01	g__SpSt-77	NA	ASV1695
	1431	d__Bacteria	p__Chloroflexota	c__Ktedonobacteria	o__Ktedonobacterales	f__Ktedonobacteraceae	g__CF-154	s__sp005879655	ASV1696
	1432	d__Bacteria	p__Proteobacteria	c__Gammaproteobacteria	o__DSM-100275	f__DSM-100275	g__Inmirania	s__thermothiophila	ASV1697
	1433	d__Bacteria	p__Nitrospirota_A_437815	c__Thermodesulfovibrionia	o__Thermodesulfovibrionales	NA	NA	NA	ASV1698
	1434	d__Bacteria	p__Proteobacteria	c__Gammaproteobacteria	NA	NA	NA	NA	ASV1699
	1435	d__Bacteria	p__Calditrichota	c__Calditrichia	o__RBG-13-44-9	f__J042	g__J075	s__sp003695285	ASV1700
	1436	d__Bacteria	p__Desulfobacterota_I	c__DSM-4660	o__Desulfatiglandales	f__Desulfatiglandaceae	g__UBA5623	NA	ASV1701
	1437	d__Bacteria	p__Bacteroidota	c__Rhodothermia	o__Rhodothermales	f__Rhodothermaceae_786286	NA	NA	ASV1707
	1438	d__Bacteria	p__Bacteroidota	c__Rhodothermia	o__Balneolales	f__Balneolaceae	g__Fodinibius_786578	s__Fodinibius saliphilus	ASV1708
	1439	d__Bacteria	p__Proteobacteria	c__Alphaproteobacteria	o__Rhodobacterales	f__Rhodobacteraceae	NA	NA	ASV1709
	1440	d__Bacteria	p__Actinobacteriota	c__Humimicrobiia	o__Humimicrobiales	f__Humimicrobiaceae	g__Halolacustris	NA	ASV1710
	1441	d__Bacteria	p__Desulfobacterota_I	c__Desulfobacteria	o__Desulfobacterales	f__SG8-13	g__SG8-13	s__sp001303025	ASV1711
	1442	d__Bacteria	p__Acidobacteriota	c__Vicinamibacteria	o__Vicinamibacterales	f__UBA2999	g__Gp6-AA45	NA	ASV1712
	1443	d__Bacteria	p__Bacteroidota	c__Ignavibacteria	o__Ignavibacteriales	f__Ignavibacteriaceae_785640	g__RBG-16-34-14	s__sp001802795	ASV1713
	1444	d__Bacteria	p__Bacteroidota	c__Bacteroidia	o__Bacteroidales	f__GCA-2748055	g__GCA-2748055	NA	ASV1714
	1445	d__Bacteria	p__Desulfobacterota_I	c__Desulfobacteria	o__Desulfobacterales	f__SG8-13	g__SG8-13	s__sp001303025	ASV1715
	1446	d__Bacteria	p__Proteobacteria	c__Gammaproteobacteria	o__GCA-2729495	f__GCA-2729495	g__GCA-002729875	s__sp002688175	ASV1719
	1447	d__Bacteria	p__Proteobacteria	c__Gammaproteobacteria	o__QQUJ01	f__QQUJ01	g__QQUJ01	NA	ASV1720
	1448	d__Bacteria	p__Planctomycetota	c__Phycisphaerae	o__UBA1845	f__DSOQ01	g__DSOQ01	s__sp011053305	ASV1721
	1449	d__Bacteria	p__Myxococcota_A_473307	c__Polyangia_463783	o__Haliangiales_463188	f__Haliangiaceae_463188	g__Haliangium_463188	s__Haliangium ochraceum	ASV1722
	1450	d__Bacteria	p__Proteobacteria	c__Alphaproteobacteria	NA	NA	NA	NA	ASV1724
	1451	d__Bacteria	p__Myxococcota_A_473307	c__Polyangia_463783	o__Haliangiales_463188	f__Haliangiaceae_463188	g__Haliangium_463188	s__Haliangium ochraceum	ASV1725
	1452	d__Bacteria	p__Bacteroidota	c__Bacteroidia	o__Chitinophagales	f__Saprospiraceae	g__Flavilitoribacter	s__nigricans	ASV1726
	1453	d__Bacteria	p__Proteobacteria	c__Gammaproteobacteria	NA	NA	NA	NA	ASV1727
	1454	d__Archaea	p__Nanoarchaeota	c__Nanoarchaeia	o__Woesearchaeales_579	NA	NA	NA	ASV1728
	1455	d__Bacteria	p__Planctomycetota	c__Phycisphaerae	o__UBA1845	f__UBA1845	NA	NA	ASV1729
	1456	d__Bacteria	p__Krumholzibacteriota	c__Krumholzibacteria	o__LZORAL124-64-63	f__LZORAL124-64-63	g__LZORAL124-64-63	NA	ASV1730
	1457	d__Bacteria	p__Chloroflexota	c__Dehalococcoidia	o__GIF9	f__AB-539-J10	g__E44-bin10	s__sp004377135	ASV1732
	1458	d__Bacteria	p__Proteobacteria	c__Gammaproteobacteria	o__Enterobacterales_A_737866	f__Vibrionaceae	g__Vibrio_678715	s__Vibrio diabolicus_674044	ASV1734
	1459	d__Bacteria	p__Zixibacteria	c__MSB-5A5_778960	o__JAABVY01	f__JAABVY01	g__JAABVY01	s__sp011056555	ASV1737
	1460	d__Bacteria	p__Bacteroidota	c__Bacteroidia	o__Bacteroidales	f__GCA-2748055	g__GCA-2748055	NA	ASV1741
	1461	d__Bacteria	p__Spirochaetota	c__Spirochaetia	o__SZUA-6	f__Bin103	g__Bin103	s__sp002238925	ASV1743
	1462	d__Bacteria	p__Proteobacteria	c__Gammaproteobacteria	NA	NA	NA	NA	ASV1744
	1463	d__Bacteria	p__Proteobacteria	c__Alphaproteobacteria	o__Kiloniellales	NA	NA	NA	ASV1745
	1464	d__Bacteria	p__Proteobacteria	c__Gammaproteobacteria	o__QQUJ01	f__QQUJ01	g__QQUJ01	NA	ASV1746
	1465	d__Bacteria	p__Proteobacteria	c__Alphaproteobacteria	o__Rhizobiales_A_504723	f__Im1	g__Rhodoligotrophos	s__appendicifer	ASV1748
	1466	d__Bacteria	p__Spirochaetota	c__Spirochaetia	o__DSM-27196	NA	NA	NA	ASV1751
	1467	d__Bacteria	p__Bacteroidota	c__Bacteroidia	o__Bacteroidales	f__Salinivirgaceae	g__Salinivirga	NA	ASV1752
	1468	d__Bacteria	p__Proteobacteria	c__Alphaproteobacteria	NA	NA	NA	NA	ASV1753
	1469	d__Bacteria	p__Proteobacteria	c__Gammaproteobacteria	NA	NA	NA	NA	ASV1755
	1470	d__Bacteria	p__Bdellovibrionota_E	c__Bacteriovoracia	o__Bacteriovoracales	f__Peredibacteraceae	g__Peredibacter	s__starrii	ASV1756
	1471	d__Bacteria	p__Desulfobacterota_G_459546	c__Desulfuromonadia	o__Desulfuromonadales	f__Geopsychrobacteraceae	NA	NA	ASV1757
	1472	d__Bacteria	p__Nitrospirota_A_437815	NA	NA	NA	NA	NA	ASV1758
	1473	d__Bacteria	p__Chloroflexota	c__Dehalococcoidia	o__Dehalococcoidales	f__W498	g__W498	NA	ASV1759
	1474	d__Bacteria	p__Proteobacteria	c__Gammaproteobacteria	o__Xanthomonadales_616050	f__Wenzhouxiangellaceae	g__Wenzhouxiangella	s__sediminis	ASV1760
	1475	d__Bacteria	p__Proteobacteria	c__Gammaproteobacteria	o__GCA-2729495	f__GCA-2729495	g__GCA-002729875	s__sp002688175	ASV1764
	1476	d__Bacteria	p__Chloroflexota	c__Anaerolineae	o__Anaerolineales	f__UBA11858	g__B10-G9	s__sp003648195	ASV1766
	1477	d__Bacteria	p__Planctomycetota	c__Planctomycetia	o__Pirellulales	NA	NA	NA	ASV1767
	1478	d__Bacteria	p__Desulfobacterota_I	c__Desulfobacteria	o__Desulfobacterales	f__Desulfosarcinaceae	NA	NA	ASV1768
	1479	d__Bacteria	p__Proteobacteria	c__Gammaproteobacteria	o__Xanthomonadales_616050	f__SZUA-36	NA	NA	ASV1772
	1480	d__Bacteria	p__Proteobacteria	c__Gammaproteobacteria	o__Pseudomonadales_641030	f__Halomonadaceae_641030	NA	NA	ASV1773
	1481	d__Bacteria	p__Desulfobacterota_I	c__Desulfobacteria	o__Desulfobacterales	f__SG8-13	g__SG8-13	s__sp001303025	ASV1774
	1482	d__Bacteria	p__Deinococcota	c__Deinococci	o__Deinococcales	f__Trueperaceae	g__CSSed10-48	s__sp007695125	ASV1775
	1483	d__Bacteria	p__Bacteroidota	c__Bacteroidia	o__Cytophagales	f__Thermonemataceae_910791	NA	NA	ASV1776
	1484	d__Bacteria	p__Myxococcota_A_473307	c__UBA9160	o__UBA9160	NA	NA	NA	ASV1777
	1485	d__Bacteria	p__Planctomycetota	c__Planctomycetia	o__Pirellulales	f__Lacipirellulaceae	NA	NA	ASV1781
	1486	d__Bacteria	p__Myxococcota_A_473307	c__Polyangia_463783	o__Polyangiales	f__SG8-38	g__GCA-2699025	s__sp002699025	ASV1782
	1487	d__Bacteria	p__Proteobacteria	c__Gammaproteobacteria	NA	NA	NA	NA	ASV1783
	1488	d__Bacteria	p__Proteobacteria	c__Gammaproteobacteria	NA	NA	NA	NA	ASV1784
	1489	d__Bacteria	p__Proteobacteria	c__Alphaproteobacteria	o__Rhizobiales_A_501396	f__Rhizobiaceae_A_499471	g__Oricola	s__thermophila	ASV1791
	1490	d__Bacteria	p__Desulfobacterota_G_459544	c__BSN033	o__BSN033	f__UBA1163	g__DTGX01	NA	ASV1792
	1491	d__Bacteria	p__Proteobacteria	c__Gammaproteobacteria	o__Coxiellales	f__Coxiellaceae	g__Coxiella	NA	ASV1793
	1492	d__Bacteria	p__Chloroflexota	c__Dehalococcoidia	o__Dehalococcoidales	NA	NA	NA	ASV1794
	1493	d__Bacteria	p__Firmicutes_A	c__Clostridia_258483	o__Tissierellales	f__VENL01	g__Sporosalibacterium	s__faouarense	ASV1795
	1494	d__Bacteria	p__Desulfobacterota_G_459546	c__Desulfuromonadia	o__Desulfuromonadales	f__Syntrophotaleaceae_438131	g__Syntrophotalea_A	s__carbinolica	ASV1796
	1495	d__Bacteria	p__Nitrospirota_A_437815	c__Thermodesulfovibrionia	o__Thermodesulfovibrionales	f__SM23-35	g__0-14-3-00-41-53	s__sp002780895	ASV1797
	1496	d__Archaea	p__Thermoproteota	c__Nitrososphaeria_A	o__Nitrososphaerales	f__Nitrosopumilaceae	g__Nitrosopumilus_5141	NA	ASV1798
	1497	d__Bacteria	p__Proteobacteria	c__Gammaproteobacteria	o__VBWC01	f__VBWC01	g__VBWC01	s__sp006218035	ASV1799
	1498	d__Archaea	p__Thermoplasmatota	c__E2	o__DHVEG-1	f__DHVEG-1	g__SM1-50	s__sp002496355	ASV1801
	1499	d__Bacteria	p__Eisenbacteria	c__RBG-16-71-46	NA	NA	NA	NA	ASV1802
	1500	d__Bacteria	p__Acidobacteriota	c__Thermoanaerobaculia	o__UBA5704	f__UBA5704	NA	NA	ASV1803
	1501	d__Bacteria	p__Eisenbacteria	c__RBG-16-71-46	NA	NA	NA	NA	ASV1805
	1502	d__Bacteria	p__Proteobacteria	c__Alphaproteobacteria	NA	NA	NA	NA	ASV1806
	1503	d__Bacteria	p__Desulfobacterota_I	c__Desulfobaccia	o__Desulfobaccales	f__Desulfobaccaceae	g__Desulfobacca	NA	ASV1807
	1504	d__Bacteria	p__Chloroflexota	c__Anaerolineae	NA	NA	NA	NA	ASV1809
	1505	d__Bacteria	p__Chloroflexota	c__Anaerolineae	o__Anaerolineales	f__EnvOPS12	g__OLB14	s__sp001567105	ASV1810
	1506	d__Bacteria	p__Bacteroidota	c__Rhodothermia	o__Balneolales	f__Balneolaceae	NA	NA	ASV1812
	1507	d__Bacteria	p__Proteobacteria	c__Alphaproteobacteria	o__Geminicoccales	f__Geminicoccaceae	NA	NA	ASV1815
	1508	d__Bacteria	p__Proteobacteria	c__Alphaproteobacteria	o__Rhizobiales_A_504721	f__Hyphomicrobiaceae	g__Hyphomicrobium_A	NA	ASV1816
	1509	d__Bacteria	p__Proteobacteria	c__Gammaproteobacteria	o__Tenderiales	f__Tenderiaceae	g__Tenderia	NA	ASV1817
	1510	d__Bacteria	p__Bacteroidota	c__Bacteroidia	o__Bacteroidales	f__GCA-2748055	g__GCA-2748055	s__sp011056635	ASV1818
	1511	d__Bacteria	p__Desulfobacterota_I	c__Desulfobacteria	o__Desulfobacterales	NA	NA	NA	ASV1819
	1512	d__Archaea	p__Thermoplasmatota	c__E2	o__DHVEG-1	f__DHVEG-1	g__SM1-50	s__sp002496355	ASV1820
	1513	d__Bacteria	p__Proteobacteria	c__Gammaproteobacteria	o__Pseudomonadales_650612	f__Cellvibrionaceae	g__Microbulbifer	NA	ASV1822
	1514	d__Bacteria	p__Myxococcota_A_473307	c__UBA9160	o__UBA9160	NA	NA	NA	ASV1824
	1515	d__Bacteria	p__Bacteroidota	c__Ignavibacteria	o__Ignavibacteriales	f__Ignavibacteriaceae_785640	g__IGN2	s__sp013285405	ASV1825
	1516	d__Bacteria	p__Zixibacteria	NA	NA	NA	NA	NA	ASV1829
	1517	d__Bacteria	p__Bacteroidota	c__Rhodothermia	o__Rhodothermales	NA	NA	NA	ASV1832
	1518	d__Bacteria	p__Methylomirabilota	NA	NA	NA	NA	NA	ASV1833
	1519	d__Bacteria	p__Firmicutes_F	c__Halanaerobiia	o__Halanaerobiales	f__Halanaerobiaceae_43036	g__Halocella_43036	s__Halocella cellulosilytica	ASV1834
	1520	d__Bacteria	p__Planctomycetota	c__Planctomycetia	o__Planctomycetales	f__Planctomycetaceae	g__JC658	s__sp011634775	ASV1835
	1521	d__Bacteria	p__Chloroflexota	c__Anaerolineae	o__Ardenticatenales	f__Ardenticatenaceae	g__Ardenticatena	NA	ASV1836
	1522	d__Bacteria	p__Firmicutes_A	c__Clostridia_258483	o__Peptostreptococcales	f__Peptostreptococcaceae_256921	NA	NA	ASV1839
	1523	d__Archaea	p__Thermoplasmatota	c__E2	o__DHVEG-1	f__DHVEG-1	g__SM1-50	s__sp002496355	ASV1840
	1524	d__Bacteria	p__Bacteroidota	c__Bacteroidia	o__Chitinophagales	f__Saprospiraceae	g__Flavilitoribacter	s__nigricans	ASV1841
	1525	d__Bacteria	p__Myxococcota_A_473307	c__Bradymonadia	o__Bradymonadales	f__Bradymonadaceae	g__V1718	NA	ASV1842
	1526	d__Bacteria	p__Planctomycetota	c__Phycisphaerae	o__Phycisphaerales	f__UBA1924	NA	NA	ASV1845
	1527	d__Bacteria	p__Actinobacteriota	c__Acidimicrobiia_402965	o__UBA5794	f__UBA5794	g__SZUA-442	s__sp003235475	ASV1846
	1528	d__Bacteria	p__Desulfobacterota_I	c__Desulfobacteria	o__Desulfobacterales	f__SG8-13	g__SG8-13	s__sp001303025	ASV1847
	1529	d__Bacteria	p__Calditrichota	c__Calditrichia	o__Calditrichales	f__Calditrichaceae	NA	NA	ASV1851
	1530	d__Bacteria	p__Spirochaetota	c__Spirochaetia	o__SZUA-6	f__Bin103	g__Bin103	s__sp002238925	ASV1852
	1531	d__Bacteria	p__Proteobacteria	c__Alphaproteobacteria	o__Caulobacterales	f__Parvularculaceae	g__Marinicaulis_488163	s__Marinicaulis aureus	ASV1853
	1532	d__Bacteria	p__Zixibacteria	c__MSB-5A5_778960	o__JAABVY01	f__JAABVY01	g__JAABVY01	s__sp011056555	ASV1854
	1533	d__Bacteria	p__Bacteroidota	c__Bacteroidia	o__Bacteroidales	f__GCA-2748055	g__GCA-2748055	NA	ASV1856
	1534	d__Bacteria	p__Actinobacteriota	c__Acidimicrobiia_401430	o__Acidimicrobiales	f__SKKL01	g__Actinomarinicola	s__tropica	ASV1857
	1535	d__Bacteria	p__Proteobacteria	c__Gammaproteobacteria	o__DSM-19610	f__DSM-19610	g__Thiogranum	NA	ASV1858
	1536	d__Bacteria	p__Bacteroidota	c__Bacteroidia	o__Bacteroidales	f__Prolixibacteraceae	g__Prolixibacter	s__denitrificans	ASV1859
	1537	d__Bacteria	p__Chloroflexota	c__Anaerolineae	NA	NA	NA	NA	ASV1862
	1538	d__Bacteria	p__Proteobacteria	c__Alphaproteobacteria	NA	NA	NA	NA	ASV1864
	1539	d__Bacteria	p__Actinobacteriota	c__Actinomycetia	o__Streptomycetales_400645	f__Streptomycetaceae_400641	g__Streptomyces_G_399870	s__ardesiacus	ASV1865
	1540	d__Bacteria	p__Acidobacteriota	c__Thermoanaerobaculia	o__UBA5704	f__UBA5704	NA	NA	ASV1866
	1541	d__Bacteria	p__Acidobacteriota	c__Vicinamibacteria	o__Bin61	f__SMYC01	g__SMYC01	s__sp004356105	ASV1867
	1542	d__Bacteria	p__Planctomycetota	c__Phycisphaerae	o__Phycisphaerales	f__SM1A02	NA	NA	ASV1868
	1543	d__Bacteria	p__Chloroflexota	c__Dehalococcoidia	o__UBA2979	f__UBA2979	g__W-Chloroflexi-9	s__sp002840675	ASV1869
	1544	d__Bacteria	p__Desulfobacterota_I	c__DSM-4660	o__Desulfatiglandales	f__Desulfatiglandaceae	g__B111-G9	s__sp011042035	ASV1870
	1545	d__Bacteria	p__Bacteroidota	c__Rhodothermia	o__Balneolales	f__Balneolaceae	NA	NA	ASV1871
	1546	d__Archaea	p__Thermoplasmatota	c__E2	o__DHVEG-1	f__DHVEG-1	g__SM1-50	s__sp002496355	ASV1872
	1547	d__Bacteria	p__Proteobacteria	c__Gammaproteobacteria	o__Thiohalomonadales	f__Thiohalomonadaceae_597810	g__Thiohalomonas	s__nitratireducens	ASV1873
	1548	d__Bacteria	p__Bdellovibrionota_E	c__Bacteriovoracia	o__Bacteriovoracales	f__Peredibacteraceae	g__Peredibacter	s__starrii	ASV1878
	1549	d__Bacteria	p__Chloroflexota	c__Limnocylindria	o__Limnocylindrales	f__CSP1-4	g__GWC2-73-18	s__sp001794945	ASV1879
	1550	d__Bacteria	p__Proteobacteria	c__Gammaproteobacteria	o__GCA-2729495	f__GCA-2729495	g__GCA-002729875	s__sp002688175	ASV1881
	1551	d__Bacteria	p__Proteobacteria	c__Gammaproteobacteria	NA	NA	NA	NA	ASV1886
	1552	d__Bacteria	p__Spirochaetota	c__Spirochaetia	o__SZUA-6	f__Bin103	g__Bin103	NA	ASV1887
	1553	d__Bacteria	p__Myxococcota_A_473307	c__Polyangia_463783	o__Polyangiales	f__SG8-38	g__SG8-38	NA	ASV1889
	1554	d__Bacteria	p__Proteobacteria	c__Gammaproteobacteria	NA	NA	NA	NA	ASV1890
	1555	d__Bacteria	p__Patescibacteria	c__Paceibacteria	o__Paceibacterales	NA	NA	NA	ASV1892
	1556	d__Bacteria	p__Desulfobacterota_G_459544	c__BSN033	o__BSN033	f__UBA1163	g__DTGX01	NA	ASV1896
	1557	d__Bacteria	p__Gemmatimonadota	c__Gemmatimonadetes	o__Longimicrobiales	f__UBA6960	NA	NA	ASV1897
	1558	d__Bacteria	p__Proteobacteria	c__Alphaproteobacteria	o__Rhodobacterales	f__Rhodobacteraceae	NA	NA	ASV1898
	1559	d__Bacteria	p__Proteobacteria	c__Gammaproteobacteria	o__Pseudomonadales_650716	f__HTCC2089_650716	NA	NA	ASV1899
	1560	d__Bacteria	p__Chloroflexota	c__Anaerolineae	o__Ardenticatenales	f__Ardenticatenaceae	g__Ardenticatena	NA	ASV1900
	1561	d__Bacteria	p__Proteobacteria	c__Alphaproteobacteria	o__Geminicoccales	f__Geminicoccaceae	NA	NA	ASV1901
	1562	d__Bacteria	p__Actinobacteriota	c__Acidimicrobiia_401430	o__Acidimicrobiales	f__Microtrichaceae	g__IMCC26207	NA	ASV1902
	1563	d__Bacteria	p__Proteobacteria	c__Gammaproteobacteria	o__Chromatiales_602636	f__Chromatiaceae_602636	g__Thiohalocapsa_602636	NA	ASV1903
	1564	d__Bacteria	p__Proteobacteria	c__Alphaproteobacteria	o__Rhodobacterales	f__Rhodobacteraceae	NA	NA	ASV1904
	1565	d__Bacteria	p__Planctomycetota	c__Planctomycetia	o__Planctomycetales	f__Planctomycetaceae	g__MB-PLM-1	NA	ASV1905
	1566	d__Bacteria	p__Firmicutes_D	c__Bacilli	o__Thermoactinomycetales_367866	f__DSM-45169_367864	NA	NA	ASV1906
	1567	d__Bacteria	p__Bacteroidota	c__Bacteroidia	o__Flavobacteriales_877923	f__Crocinitomicaceae	g__Crocinitomix	NA	ASV1907
	1568	d__Bacteria	p__Proteobacteria	c__Alphaproteobacteria	NA	NA	NA	NA	ASV1908
	1569	d__Bacteria	p__Proteobacteria	c__Alphaproteobacteria	o__Rhizobiales_A_504721	f__Methyloligellaceae	g__Methyloligella	NA	ASV1910
	1570	d__Bacteria	p__Gemmatimonadota	c__Gemmatimonadetes	o__KS3-K002	f__JABDQB01	g__JAAXHJ01	s__sp009838765	ASV1911
	1571	d__Bacteria	p__Actinobacteriota	c__Acidimicrobiia_401430	o__Acidimicrobiales	f__Ilumatobacteraceae	g__Ilumatobacter_A	s__coccineus_A_400748	ASV1913
	1572	d__Bacteria	p__Eisenbacteria	c__RBG-16-71-46	NA	NA	NA	NA	ASV1914
	1573	d__Bacteria	p__Actinobacteriota	c__Acidimicrobiia_402965	o__UBA5794	f__UBA5794	g__SZUA-442	s__sp003235475	ASV1917
	1574	d__Bacteria	p__Myxococcota_A_473307	c__Polyangia_463783	o__Polyangiales	f__SG8-38	g__SG8-38	NA	ASV1922
	1575	d__Bacteria	p__Firmicutes_D	c__Bacilli	o__Bacillales_D_310495	f__Halobacillaceae	g__Halobacillus_A_288294	NA	ASV1924
	1576	d__Bacteria	p__Desulfobacterota_I	c__DSM-4660	o__Desulfatiglandales	f__Desulfatiglandaceae	g__UBA5623	NA	ASV1925
	1577	d__Bacteria	p__Proteobacteria	c__Alphaproteobacteria	o__Caulobacterales	f__Maricaulaceae	NA	NA	ASV1926
	1578	d__Bacteria	p__Proteobacteria	c__Gammaproteobacteria	o__Pseudomonadales_660954	f__HTCC2089_660954	NA	NA	ASV1927
	1579	d__Bacteria	p__Acidobacteriota	c__Thermoanaerobaculia	o__UBA5704	f__UBA5704	NA	NA	ASV1930
	1580	d__Bacteria	p__Myxococcota_A_473307	c__UBA9160	o__UBA9160	NA	NA	NA	ASV1931
	1581	d__Bacteria	p__Proteobacteria	c__Gammaproteobacteria	NA	NA	NA	NA	ASV1932
	1582	d__Bacteria	p__Proteobacteria	c__Alphaproteobacteria	NA	NA	NA	NA	ASV1935
	1583	d__Bacteria	p__Proteobacteria	c__Alphaproteobacteria	o__Caulobacterales	f__Maricaulaceae	NA	NA	ASV1936
	1584	d__Bacteria	p__Chloroflexota	c__Anaerolineae	o__Anaerolineales	f__EnvOPS12	NA	NA	ASV1937
	1585	d__Bacteria	p__Calditrichota	c__Calditrichia	o__RBG-13-44-9	f__J042	g__J075	NA	ASV1938
	1586	d__Bacteria	p__Desulfobacterota_I	c__Desulfobacteria	o__Desulfobacterales	f__UBA11574	g__S5133MH16	s__sp004193595	ASV1939
	1587	d__Bacteria	p__Chloroflexota	c__Dehalococcoidia	o__Dehalococcoidales	f__W498	g__W498	NA	ASV1940
	1588	d__Bacteria	p__Acidobacteriota	c__UBA6911	o__UBA6911	f__UBA6911	g__Gp18-AA60	s__sp003225335	ASV1941
	1589	d__Archaea	p__Thermoplasmatota	NA	NA	NA	NA	NA	ASV1942
	1590	d__Archaea	p__Thermoplasmatota	c__E2	o__DHVEG-1	f__DHVEG-1	g__SM1-50	s__sp002496355	ASV1943
	1591	d__Bacteria	p__Proteobacteria	c__Gammaproteobacteria	o__Pseudomonadales_641030	f__Halomonadaceae_641030	g__Halomonas_E_640244	s__litopenaei	ASV1948
	1592	d__Bacteria	p__Proteobacteria	c__Gammaproteobacteria	o__HK1	f__HK1	g__HK1	s__sp000583135	ASV1949
	1593	d__Bacteria	p__Proteobacteria	c__Gammaproteobacteria	o__Pseudomonadales_641030	f__Halomonadaceae_641030	g__Halomonas_E_640272	s__daqiaonensis	ASV1951
	1594	d__Bacteria	p__Proteobacteria	c__Gammaproteobacteria	o__DSM-19610	f__DSM-19610	g__Thiogranum	s__longum	ASV1954
	1595	d__Archaea	p__Asgardarchaeota	c__Thorarchaeia	o__Thorarchaeales	f__Thorarchaeaceae	g__MP8T-1	s__sp002825465	ASV1956
	1596	d__Bacteria	p__Chloroflexota	c__Anaerolineae	o__Anaerolineales	f__UBA11858	g__B10-G9	s__sp003648195	ASV1957
	1597	d__Bacteria	p__Proteobacteria	c__Alphaproteobacteria	o__Rhizobiales_A_504705	f__Xanthobacteraceae_503485	NA	NA	ASV1958
	1598	d__Bacteria	p__Nitrospirota_A_437815	c__Thermodesulfovibrionia	o__UBA6902	NA	NA	NA	ASV1960
	1599	d__Bacteria	p__Desulfobacterota_I	c__DSM-4660	o__Desulfatiglandales	f__Desulfatiglandaceae	g__UBA5623	NA	ASV1961
	1600	d__Bacteria	p__Proteobacteria	c__Alphaproteobacteria	o__Geminicoccales	f__Geminicoccaceae	NA	NA	ASV1963
	1601	d__Bacteria	p__Actinobacteriota	c__Acidimicrobiia_401430	o__Acidimicrobiales	f__TK06	g__WTFX01	NA	ASV1964
	1602	d__Bacteria	p__Myxococcota_A_473307	c__UBA9160	o__UBA9160	NA	NA	NA	ASV1965
	1603	d__Bacteria	p__Firmicutes_F	c__Halanaerobiia	o__Halanaerobiales	f__DTU029	g__Halocella_43035	NA	ASV1968
	1604	d__Bacteria	p__Verrucomicrobiota	c__Verrucomicrobiae	o__Pedosphaerales	f__UBA3939	g__UBA3939	s__sp002385705	ASV1969
	1605	d__Bacteria	p__Chloroflexota	c__Anaerolineae	NA	NA	NA	NA	ASV1970
	1606	d__Bacteria	p__Proteobacteria	c__Alphaproteobacteria	o__Kiloniellales	NA	NA	NA	ASV1971
	1607	d__Bacteria	p__Proteobacteria	c__Gammaproteobacteria	o__Pseudomonadales_650612	f__DSM-21967	g__Dasania	NA	ASV1972
	1608	d__Bacteria	p__Calditrichota	c__Calditrichia	o__Calditrichales	f__Calditrichaceae	g__Caldithrix	s__palaeochoryensis	ASV1973
	1609	d__Archaea	p__Thermoproteota	c__Bathyarchaeia	o__B26-1	f__UBA233	g__PALSA-986	NA	ASV1977
	1610	d__Bacteria	p__Bacteroidota	c__Bacteroidia	o__Bacteroidales	f__Salinivirgaceae	g__Salinivirga	NA	ASV1978
	1611	d__Bacteria	p__Latescibacterota	c__Latescibacteria	o__Latescibacterales	f__Latescibacteraceae	g__Latescibacter	s__anaerobius	ASV1979
	1612	d__Bacteria	p__Calditrichota	c__Calditrichia	o__RBG-13-44-9	f__J042	g__J075	NA	ASV1980
	1613	d__Bacteria	p__Desulfobacterota_I	c__DSM-4660	o__Desulfatiglandales	f__HGW-15	g__JAAZBV01	s__sp012513605	ASV1982
	1614	d__Bacteria	p__Proteobacteria	c__Alphaproteobacteria	o__Rhizobiales_A_504721	f__Methyloligellaceae	g__Methyloligella	NA	ASV1983
	1615	d__Bacteria	p__Proteobacteria	c__Gammaproteobacteria	NA	NA	NA	NA	ASV1985
	1616	d__Bacteria	p__Myxococcota_A_473307	c__UBA9160	o__UBA9160	f__PR03	g__CAADGG01	NA	ASV1986
	1617	d__Bacteria	p__Proteobacteria	c__Gammaproteobacteria	o__Halothiobacillales	f__Halothiobacillaceae_605198	g__Guyparkeria	NA	ASV1990
	1618	d__Bacteria	p__Bacteroidota	c__Kapabacteria	o__Kapabacteriales	f__UBA2268	g__PGYR01	s__sp002839765	ASV1991
	1619	d__Bacteria	p__Desulfobacterota_D	c__UBA1144	o__UBA2774	f__CSP1-2	g__HRBIN37	s__sp002898375	ASV1993
	1620	d__Bacteria	p__Bacteroidota	c__Bacteroidia	o__Bacteroidales	f__GCA-2748055	g__GCA-2748055	s__sp011056635	ASV1995
	1621	d__Bacteria	p__Spirochaetota	c__Spirochaetia	o__SZUA-6	f__Bin103	g__Bin103	s__sp002238925	ASV1997
	1622	d__Bacteria	p__Desulfobacterota_I	c__Desulfobacteria	o__Desulfobacterales	f__SG8-13	g__SG8-13	s__sp001303025	ASV1998
	1623	d__Bacteria	p__SZUA-79	c__SZUA-79	o__Acidulodesulfobacterales	NA	NA	NA	ASV1999
	1624	d__Archaea	p__Thermoproteota	c__Bathyarchaeia	o__B26-1	f__BA1	g__SOJZ01	s__sp004376295	ASV2000
	1625	d__Bacteria	p__Desulfobacterota_I	c__DSM-4660	o__Desulfatiglandales	f__HGW-15	g__JAAZBV01	s__sp012513605	ASV2001
	1626	d__Bacteria	p__Proteobacteria	c__Gammaproteobacteria	o__Burkholderiales_592524	f__Burkholderiaceae_A_574758	g__Janthinobacterium_571526	NA	ASV2002
	1627	d__Archaea	p__Thermoproteota	c__Bathyarchaeia	o__B26-1	f__BA1	g__BA2	s__sp001399795	ASV2003
	1628	d__Bacteria	p__Desulfobacterota_C	c__Desulfomonilia	o__Desulfomonilales	f__Desulfomonilaceae	g__Desulfomonile	NA	ASV2005
	1629	d__Bacteria	p__Bacteroidota	c__Rhodothermia	o__Balneolales	f__Balneolaceae	NA	NA	ASV2006
	1630	d__Archaea	p__Thermoproteota	c__Bathyarchaeia	o__B26-1	f__BA1	g__BA2	s__sp001399795	ASV2007
	1631	d__Bacteria	p__Proteobacteria	c__Alphaproteobacteria	NA	NA	NA	NA	ASV2008
	1632	d__Bacteria	p__Proteobacteria	c__Alphaproteobacteria	NA	NA	NA	NA	ASV2009
	1633	d__Archaea	p__Nanoarchaeota	c__Nanoarchaeia	o__Pacearchaeales	f__GW2011-AR1	g__BMS3ABIN17	s__sp002897655	ASV2010
	1634	d__Bacteria	p__Proteobacteria	c__Alphaproteobacteria	o__Rhizobiales_A_501396	f__Rhizobiaceae_A_499470	g__Mesorhizobium_F_498388	NA	ASV2011
	1635	d__Bacteria	p__Proteobacteria	c__Gammaproteobacteria	o__Pseudomonadales_641035	f__Nitrincolaceae	g__Marinobacterium_A_637622	s__lutimaris	ASV2012
	1636	d__Bacteria	p__Zixibacteria	c__MSB-5A5_778917	o__MSB-5A5_778917	f__SM1-73	g__SM1-73	s__sp001304225	ASV2013
	1637	d__Bacteria	p__Desulfobacterota_D	c__UBA1144	o__UBA2774	f__CSP1-2	g__HRBIN37	s__sp002898375	ASV2014
	1638	d__Bacteria	p__Gemmatimonadota	c__Gemmatimonadetes	o__Longimicrobiales	f__UBA6960	g__UBA2982	s__sp009692205	ASV2015
	1639	d__Archaea	p__Nanoarchaeota	c__Nanoarchaeia	o__Pacearchaeales	f__GW2011-AR1	g__BMS3ABIN17	s__sp002897655	ASV2018
	1640	d__Bacteria	p__Bacteroidota	c__Rhodothermia	o__Rhodothermales	f__Rubricoccaceae	NA	NA	ASV2021
	1641	d__Bacteria	p__Firmicutes_E	NA	NA	NA	NA	NA	ASV2022
	1642	d__Bacteria	p__Myxococcota_A_473307	c__UBA9160	o__UBA9160	NA	NA	NA	ASV2023
	1643	d__Bacteria	p__Bacteroidota	c__Bacteroidia	o__Bacteroidales	f__F082	NA	NA	ASV2030
	1644	d__Bacteria	p__Actinobacteriota	c__Acidimicrobiia_402965	o__UBA5794	f__UBA5794	g__SZUA-442	s__sp003235475	ASV2035
	1645	d__Bacteria	p__Deinococcota	c__Deinococci	o__Deinococcales	f__Trueperaceae	NA	NA	ASV2037
	1646	d__Bacteria	p__Desulfobacterota_I	c__Dissulfuribacteria	o__Dissulfuribacterales	NA	NA	NA	ASV2038
	1647	d__Archaea	p__Thermoproteota	c__Bathyarchaeia	o__B26-1	NA	NA	NA	ASV2040
	1648	d__Archaea	p__Thermoplasmatota	c__E2	o__DHVEG-1	f__DHVEG-1	g__SM1-50	s__sp002496355	ASV2043
	1649	d__Bacteria	p__Desulfobacterota_I	c__Desulfobacteria	o__Desulfobacterales	f__SG8-13	g__SG8-13	s__sp001303025	ASV2045
	1650	d__Bacteria	p__Chloroflexota	c__Anaerolineae	o__Promineofilales	f__Promineofilaceae	NA	NA	ASV2046
	1651	d__Bacteria	p__Proteobacteria	c__Gammaproteobacteria	o__Pseudomonadales_641030	f__Halomonadaceae_641030	g__Halomonas_E_640244	NA	ASV2047
	1652	d__Bacteria	p__Planctomycetota	c__Planctomycetia	o__Planctomycetales	f__Planctomycetaceae	g__Polystyrenella	NA	ASV2048
	1653	d__Bacteria	p__Proteobacteria	c__Alphaproteobacteria	NA	NA	NA	NA	ASV2050
	1654	d__Bacteria	p__Proteobacteria	c__Alphaproteobacteria	NA	NA	NA	NA	ASV2051
	1655	d__Bacteria	p__Myxococcota_A_473307	c__Polyangia_463783	o__Polyangiales	f__SLQV01	g__SLQV01	s__sp007131285	ASV2052
	1656	d__Bacteria	p__Gemmatimonadota	c__Gemmatimonadetes	o__KS3-K002	f__JABDQB01	g__JAAXHJ01	s__sp009838765	ASV2053
	1657	d__Bacteria	p__Campylobacterota	c__Campylobacteria	o__Campylobacterales	f__Sulfurovaceae	g__Sulfurovum	s__aggregans	ASV2054
	1658	d__Bacteria	p__Proteobacteria	c__Gammaproteobacteria	o__Enterobacterales_A_737866	f__Alteromonadaceae_665222	g__Idiomarina	s__aquatica	ASV2055
	1659	d__Archaea	p__Nanoarchaeota	c__Nanoarchaeia	o__Pacearchaeales	f__GW2011-AR1	g__BMS3ABIN17	s__sp002897655	ASV2056
	1660	d__Bacteria	p__Firmicutes_F	c__Halanaerobiia	o__Halanaerobiales	f__Halanaerobiaceae_43036	g__Halocella_43036	s__Halocella cellulosilytica	ASV2058
	1661	d__Bacteria	p__Proteobacteria	c__Gammaproteobacteria	o__Xanthomonadales_616050	f__SZUA-36	NA	NA	ASV2061
	1662	d__Archaea	p__Thermoproteota	c__Bathyarchaeia	o__B26-1	f__BA1	g__BA2	s__sp001399795	ASV2062
	1663	d__Bacteria	p__Acidobacteriota	c__UBA6911	o__UBA6911	f__UBA6911	g__Gp18-AA60	s__sp003225335	ASV2063
	1664	d__Bacteria	p__Proteobacteria	c__Gammaproteobacteria	NA	NA	NA	NA	ASV2064
	1665	d__Bacteria	p__Dependentiae	c__Babeliae	o__Babeliales	NA	NA	NA	ASV2065
	1666	d__Bacteria	p__Acidobacteriota	c__Aminicenantia	o__Aminicenantales	f__Aminicenantaceae	NA	NA	ASV2067
	1667	d__Bacteria	p__Proteobacteria	c__Alphaproteobacteria	NA	NA	NA	NA	ASV2069
	1668	d__Bacteria	p__Gemmatimonadota	c__Gemmatimonadetes	o__Longimicrobiales	f__UBA6960	g__Bin94	s__sp002238865	ASV2070
	1669	d__Bacteria	p__Acidobacteriota	c__Thermoanaerobaculia	o__UBA5704	f__UBA5704	NA	NA	ASV2072
	1670	d__Bacteria	p__Actinobacteriota	c__Actinomycetia	o__Mycobacteriales	f__Mycobacteriaceae	g__Mycobacterium	NA	ASV2073
	1671	d__Bacteria	p__Chloroflexota	c__Anaerolineae	o__Ardenticatenales	f__Ardenticatenaceae	g__Ardenticatena	NA	ASV2075
	1672	d__Bacteria	p__Eisenbacteria	c__RBG-16-71-46	NA	NA	NA	NA	ASV2077
	1673	d__Bacteria	p__Actinobacteriota	c__Thermoleophilia	o__Solirubrobacterales	f__70-9	g__VAYN01	s__sp005885405	ASV2078
	1674	d__Bacteria	p__Chloroflexota	c__Dehalococcoidia	o__DSTF01	f__WHTK01	g__WHTK01	s__sp009377745	ASV2080
	1675	d__Archaea	p__Halobacteriota	c__Halobacteria	o__Halobacteriales	f__Haladaptataceae	g__Haladaptatus	s__paucihalophilus	ASV2081
	1676	d__Bacteria	p__Chloroflexota	c__Dehalococcoidia	o__Dehalococcoidales	f__W498	g__W498	NA	ASV2082
	1677	d__Bacteria	p__Planctomycetota	c__Phycisphaerae	o__Phycisphaerales	NA	NA	NA	ASV2083
	1678	d__Bacteria	p__Patescibacteria	c__ABY1	NA	NA	NA	NA	ASV2084
	1679	d__Bacteria	p__Bacteroidota	c__Bacteroidia	o__Chitinophagales	f__Saprospiraceae	g__Membranicola	NA	ASV2085
	1680	d__Bacteria	p__Planctomycetota	NA	NA	NA	NA	NA	ASV2087
	1681	d__Bacteria	p__Patescibacteria	c__ABY1	o__Magasanikbacterales	f__UBA922	g__SZUA-124	s__sp003230965	ASV2088
	1682	d__Bacteria	p__Acidobacteriota	c__Acidobacteriae	NA	NA	NA	NA	ASV2089
	1683	d__Bacteria	p__Chloroflexota	c__Anaerolineae	o__B4-G1	f__DUEL01	g__SpSt-77	NA	ASV2090
	1684	d__Bacteria	p__Proteobacteria	c__Gammaproteobacteria	o__HK1	f__HK1	g__HK1	s__sp000583135	ASV2091
	1685	d__Bacteria	p__Proteobacteria	c__Gammaproteobacteria	o__Pseudomonadales_650611	f__Pseudomonadaceae	g__Pseudomonas_E_647464	s__versuta	ASV2092
	1686	d__Bacteria	p__Actinobacteriota	c__Humimicrobiia	o__Humimicrobiales	f__Humimicrobiaceae	g__Halolacustris	NA	ASV2095
	1687	d__Bacteria	p__Gemmatimonadota	c__Gemmatimonadetes	o__Longimicrobiales	f__RSA9	g__RSA9	NA	ASV2096
	1688	d__Bacteria	p__Firmicutes_D	c__Bacilli	o__Bacillales_D_310495	f__Halobacillaceae	g__Halobacillus_A_288294	NA	ASV2098
	1689	d__Bacteria	p__Firmicutes_A	c__Clostridia_258483	o__Clostridiales	f__Clostridiaceae_222000	g__Oceanirhabdus	s__sediminicola	ASV2100
	1690	d__Bacteria	p__Desulfobacterota_I	c__Desulfobacteria	o__Desulfobacterales	f__UBA11574	g__S5133MH16	s__sp004193595	ASV2107
	1691	d__Bacteria	p__Firmicutes_A	c__Clostridia_258483	o__Lachnospirales	f__Lachnospiraceae	g__Lachnotalea	NA	ASV2108
	1692	d__Bacteria	p__Acidobacteriota	c__Thermoanaerobaculia	o__Thermoanaerobaculales	NA	NA	NA	ASV2109
	1693	d__Archaea	p__Halobacteriota	c__Halobacteria	o__Halobacteriales	NA	NA	NA	ASV2113
	1694	d__Bacteria	p__Planctomycetota	c__Brocadiae	o__SM23-32	f__SM23-32	g__SM23-32	s__sp001303885	ASV2114
	1695	d__Bacteria	p__Desantisbacteria	c__UBA1551	NA	NA	NA	NA	ASV2115
	1696	d__Bacteria	p__Myxococcota_A_473307	c__UBA9160	o__UBA9160	NA	NA	NA	ASV2116
	1697	d__Bacteria	p__Desulfobacterota_I	c__Desulfobacteria	o__Desulfobacterales	NA	NA	NA	ASV2117
	1698	d__Bacteria	p__Gemmatimonadota	c__Gemmatimonadetes	o__Longimicrobiales	f__UBA6960	g__PXFI01	s__sp003564295	ASV2119
	1699	d__Bacteria	p__Proteobacteria	c__Gammaproteobacteria	NA	NA	NA	NA	ASV2120
	1700	d__Bacteria	p__Patescibacteria	c__Paceibacteria	o__UBA6257	f__2-01-FULL-56-20	g__SURF-56	s__sp003599135	ASV2121
	1701	d__Bacteria	p__Desulfobacterota_I	c__Desulfobulbia	o__Desulfobulbales	f__Desulfocapsaceae	g__Desulfofustis	s__glycolicus	ASV2124
	1702	d__Bacteria	p__Chloroflexota	c__Dehalococcoidia	o__UBA1151	f__UBA1328	NA	NA	ASV2125
	1703	d__Bacteria	p__Desulfobacterota_I	c__Desulfobaccia	o__Desulfobaccales	f__Desulfobaccaceae	g__Desulfobacca	NA	ASV2132
	1704	d__Bacteria	p__Bacteroidota	c__Bacteroidia	o__Cytophagales	f__Cyclobacteriaceae_900709	g__Fulvivirga	NA	ASV2133
	1705	d__Bacteria	p__Proteobacteria	c__Gammaproteobacteria	o__Chromatiales_602909	f__Chromatiaceae_602909	NA	NA	ASV2134
	1706	d__Archaea	p__Nanoarchaeota	c__Nanoarchaeia	NA	NA	NA	NA	ASV2135
	1707	d__Bacteria	p__Bacteroidota	c__Bacteroidia	o__Cytophagales	f__Thermonemataceae_910791	NA	NA	ASV2137
	1708	d__Bacteria	p__Zixibacteria	c__MSB-5A5_778960	o__JAABVY01	f__JAABVY01	g__JAABVY01	s__sp011056555	ASV2138
	1709	d__Bacteria	p__Chloroflexota	c__Anaerolineae	o__Anaerolineales	NA	NA	NA	ASV2140
	1710	d__Bacteria	p__Desulfobacterota_G_459544	c__SM23-61	o__SM23-61	f__SM23-61	g__SM23-61	s__sp001304105	ASV2141
	1711	d__Bacteria	p__Proteobacteria	c__Alphaproteobacteria	o__Geminicoccales	f__Geminicoccaceae	g__Arboricoccus	s__pini	ASV2142
	1712	d__Bacteria	p__Chloroflexota	c__Limnocylindria	o__Limnocylindrales	f__CSP1-4	g__GWC2-73-18	NA	ASV2143
	1713	d__Bacteria	p__Deinococcota	c__Deinococci	o__Deinococcales	f__Trueperaceae	NA	NA	ASV2144
	1714	d__Bacteria	p__Calditrichota	c__Calditrichia	o__RBG-13-44-9	f__J042	g__J075	NA	ASV2145
	1715	d__Archaea	p__Asgardarchaeota	c__Thorarchaeia	o__Thorarchaeales	f__Thorarchaeaceae	NA	NA	ASV2146
	1716	d__Bacteria	p__Desulfobacterota_I	c__Desulfobacteria	o__Desulfobacterales	f__SG8-13	g__SG8-13	s__sp001303025	ASV2150
	1717	d__Bacteria	p__Gemmatimonadota	c__Gemmatimonadetes	o__Longimicrobiales	f__UBA6960	g__BD2-11	s__sp002238605	ASV2151
	1718	d__Archaea	p__Thermoproteota	c__Bathyarchaeia	o__TCS64	f__TCS64	g__GCA-2726865	s__sp002726865	ASV2152
	1719	d__Bacteria	p__Campylobacterota	c__Campylobacteria	o__Campylobacterales	f__Sulfurovaceae	g__UBA1140	NA	ASV2153
	1720	d__Bacteria	p__Chloroflexota	c__Anaerolineae	o__4572-78	f__J111	g__DSQQ01	NA	ASV2154
	1721	d__Bacteria	p__Proteobacteria	c__Gammaproteobacteria	NA	NA	NA	NA	ASV2156
	1722	d__Bacteria	p__Gemmatimonadota	c__Gemmatimonadetes	o__Longimicrobiales	f__UBA6960	NA	NA	ASV2157
	1723	d__Bacteria	p__Desulfobacterota_D	c__UBA1144	o__RKRQ01	f__RKRQ01	g__RKRQ01	s__sp009840385	ASV2159
	1724	d__Bacteria	p__Planctomycetota	c__DG-23	o__SLPQ01	f__SLPQ01	g__SLPQ01	s__sp007131925	ASV2160
	1725	d__Bacteria	p__Proteobacteria	c__Gammaproteobacteria	o__Pseudomonadales_650612	f__Cellvibrionaceae	g__Microbulbifer	s__echini	ASV2161
	1726	d__Bacteria	p__Bacteroidota	c__Bacteroidia	o__Chitinophagales	f__Saprospiraceae	NA	NA	ASV2164
	1727	d__Bacteria	p__Myxococcota_A_473307	c__Polyangia_463783	o__DRWM01	f__JAAZOP01	g__JAAZOP01	s__sp011367485	ASV2165
	1728	d__Bacteria	p__Proteobacteria	c__Alphaproteobacteria	o__Rhizobiales_A_501396	f__Rhizobiaceae_A_499470	NA	NA	ASV2168
	1729	d__Bacteria	p__Proteobacteria	c__Alphaproteobacteria	o__Rhizobiales_A_504705	f__Xanthobacteraceae_503485	NA	NA	ASV2171
	1730	d__Bacteria	p__Proteobacteria	c__Gammaproteobacteria	o__GCA-001735895	f__GCA-001735895	g__GCA-001735895	s__sp001735895	ASV2172
	1731	d__Bacteria	p__Gemmatimonadota	c__Gemmatimonadetes	o__KS3-K002	f__JABDQB01	g__JAAXHJ01	s__sp009838765	ASV2173
	1732	d__Bacteria	p__Myxococcota_A_473307	c__UBA9160	o__UBA9160	NA	NA	NA	ASV2174
	1733	d__Bacteria	p__Bacteroidota	c__Bacteroidia	o__Flavobacteriales_877923	f__Flavobacteriaceae	NA	NA	ASV2177
	1734	d__Bacteria	p__Chloroflexota	c__Anaerolineae	o__Ardenticatenales	f__Ardenticatenaceae	g__Ardenticatena	NA	ASV2178
	1735	d__Bacteria	p__Chloroflexota	c__Dehalococcoidia	o__Dehalococcoidales	f__W498	g__W498	NA	ASV2179
	1736	d__Bacteria	p__Desulfobacterota_I	c__DSM-4660	o__Desulfatiglandales	f__Desulfatiglandaceae	g__UBA5623	s__sp900258555	ASV2181
	1737	d__Bacteria	p__Desulfobacterota_I	c__DSM-4660	o__Desulfatiglandales	f__HGW-15	NA	NA	ASV2184
	1738	d__Bacteria	p__Chloroflexota	c__Anaerolineae	o__Anaerolineales	NA	NA	NA	ASV2185
	1739	d__Bacteria	p__Bacteroidota	c__Ignavibacteria	o__Ignavibacteriales	f__Ignavibacteriaceae_785640	g__IGN2	NA	ASV2186
	1740	d__Bacteria	p__Desulfobacterota_G_459544	c__WTBG01	NA	NA	NA	NA	ASV2187
	1741	d__Bacteria	p__Proteobacteria	c__Gammaproteobacteria	o__Pseudomonadales_660954	f__HTCC2089_660954	g__SZUA-309	s__sp003228415	ASV2188
	1742	d__Bacteria	p__Myxococcota_A_473307	c__UBA9160	o__UBA9160	f__PR03	g__CAADGG01	NA	ASV2189
	1743	d__Archaea	p__Thermoproteota	c__Bathyarchaeia	o__B26-1	f__BA1	g__SOJZ01	s__sp004376295	ASV2191
	1744	d__Bacteria	p__Myxococcota_A_473307	c__Polyangia_463783	NA	NA	NA	NA	ASV2192
	1745	d__Bacteria	p__Actinobacteriota	c__Acidimicrobiia_401430	o__Acidimicrobiales	NA	NA	NA	ASV2193
	1746	d__Bacteria	p__Proteobacteria	c__Gammaproteobacteria	o__HK1	f__HK1	NA	NA	ASV2194
	1747	d__Bacteria	p__Proteobacteria	c__Gammaproteobacteria	o__Pseudomonadales_650612	f__Halieaceae	NA	NA	ASV2197
	1748	d__Bacteria	p__Bacteroidota	c__Rhodothermia	o__Balneolales	f__Balneolaceae	NA	NA	ASV2199
	1749	d__Bacteria	p__Zixibacteria	c__MSB-5A5_778917	o__MSB-5A5_778917	f__SM1-73	g__SM1-73	s__sp001304225	ASV2200
	1750	d__Bacteria	p__Proteobacteria	c__Gammaproteobacteria	NA	NA	NA	NA	ASV2201
	1751	d__Bacteria	p__Spirochaetota	c__Spirochaetia	o__SZUA-6	f__Bin103	g__Bin103	s__sp002238925	ASV2202
	1752	d__Archaea	p__Nanoarchaeota	c__Nanoarchaeia	o__Pacearchaeales	f__GW2011-AR1	g__BMS3ABIN17	s__sp002897655	ASV2204
	1753	d__Bacteria	p__Chloroflexota	c__Anaerolineae	o__UBA1429	f__UBA1429	g__SKLG01	NA	ASV2205
	1754	d__Bacteria	p__Proteobacteria	c__Gammaproteobacteria	o__Methylococcales	f__Methylothermaceae	NA	NA	ASV2209
	1755	d__Bacteria	p__Chloroflexota	c__Anaerolineae	NA	NA	NA	NA	ASV2210
	1756	d__Bacteria	p__Proteobacteria	c__Alphaproteobacteria	o__Rhizobiales_A_504705	f__Xanthobacteraceae_503485	g__Rhodoplanes	s__serenus	ASV2213
	1757	d__Bacteria	p__Proteobacteria	c__Gammaproteobacteria	o__Xanthomonadales_613062	f__Rhodanobacteraceae_613062	g__Oleiagrimonas	s__citrea	ASV2216
	1758	d__Bacteria	p__Desulfobacterota_I	c__DSM-4660	o__Desulfatiglandales	f__Desulfatiglandaceae	NA	NA	ASV2217
	1759	d__Bacteria	p__Bacteroidota	c__Ignavibacteria	o__Ignavibacteriales	f__Ignavibacteriaceae_785640	NA	NA	ASV2228
	1760	d__Bacteria	p__Acidobacteriota	c__UBA6911	o__UBA6911	f__UBA6911	g__Gp18-AA60	NA	ASV2230
	1761	d__Bacteria	p__Bacteroidota	c__Bacteroidia	o__Bacteroidales	f__VadinHA17_874699	g__DRPN01	NA	ASV2231
	1762	d__Bacteria	p__Firmicutes_D	c__Bacilli	o__Paenibacillales	NA	NA	NA	ASV2232
	1763	d__Archaea	p__Methanobacteriota_B	c__Thermococci	o__Methanofastidiosales	f__Methanofastidiosaceae	g__Methanofastidiosum	NA	ASV2233
	1764	d__Bacteria	p__Desulfobacterota_I	c__Syntrophobacteria	o__Syntrophobacterales	NA	NA	NA	ASV2235
	1765	d__Bacteria	p__Proteobacteria	c__Gammaproteobacteria	o__QQUJ01	f__QQUJ01	g__QQUJ01	NA	ASV2236
	1766	d__Bacteria	p__Chloroflexota	c__Anaerolineae	NA	NA	NA	NA	ASV2237
	1767	d__Bacteria	p__Acidobacteriota	c__UBA6911	o__UBA6911	f__UBA6911	g__Gp18-AA60	NA	ASV2238
	1768	d__Bacteria	p__Acidobacteriota	c__UBA6911	o__UBA6911	f__UBA6911	g__Gp18-AA60	NA	ASV2240
	1769	d__Bacteria	p__Chloroflexota	c__Anaerolineae	NA	NA	NA	NA	ASV2243
	1770	d__Bacteria	p__Proteobacteria	c__Gammaproteobacteria	o__HK1	f__HK1	g__HK1	s__sp000583135	ASV2244
	1771	d__Bacteria	p__Firmicutes_A	c__Clostridia_258483	o__Clostridiales	f__Clostridiaceae_222000	g__Clostridium_AD	NA	ASV2245
	1772	d__Bacteria	p__Bacteroidota	NA	NA	NA	NA	NA	ASV2246
	1773	d__Bacteria	p__Proteobacteria	c__Gammaproteobacteria	NA	NA	NA	NA	ASV2247
	1774	d__Archaea	p__Thermoproteota	c__Bathyarchaeia	o__B26-1	NA	NA	NA	ASV2248
	1775	d__Bacteria	p__Proteobacteria	c__Gammaproteobacteria	o__Thiomicrospirales	f__Thiomicrospiraceae	g__Hydrogenovibrio	s__thermophilus	ASV2249
	1776	d__Archaea	p__Nanoarchaeota	c__Nanoarchaeia	o__Pacearchaeales	f__GW2011-AR1	g__BMS3ABIN17	s__sp002897655	ASV2251
	1777	d__Bacteria	p__Spirochaetota	c__Spirochaetia	o__DSM-27196	f__SKKC01	g__SKKC01	NA	ASV2253
	1778	d__Bacteria	p__Chloroflexota	c__Dehalococcoidia	o__DSTF01	f__WHTK01	g__WHTK01	s__sp009377745	ASV2259
	1779	d__Bacteria	p__SAR324	c__SAR324	o__SAR324	f__NAC60-12	NA	NA	ASV2263
	1780	d__Bacteria	p__Planctomycetota	c__UBA8108	o__UBA1146	f__UBA1146	NA	NA	ASV2267
	1781	d__Archaea	p__Nanoarchaeota	c__Nanoarchaeia	o__Pacearchaeales	f__GW2011-AR1	g__BMS3ABIN17	s__sp002897655	ASV2269
	1782	d__Archaea	p__Nanoarchaeota	c__Nanoarchaeia	o__Pacearchaeales	f__GW2011-AR1	g__BMS3ABIN17	s__sp002897655	ASV2271
	1783	d__Bacteria	p__Actinobacteriota	c__Acidimicrobiia_402965	o__UBA5794	f__UBA5794	g__SZUA-442	s__sp003235475	ASV2272
	1784	d__Bacteria	p__Proteobacteria	c__Gammaproteobacteria	o__Pseudomonadales_641030	f__Halomonadaceae_641030	g__Halomonas_C_640082	NA	ASV2273
	1785	d__Bacteria	p__Chlamydiota	NA	NA	NA	NA	NA	ASV2274
	1786	d__Bacteria	p__Proteobacteria	c__Gammaproteobacteria	o__Pseudomonadales_650611	f__Pseudomonadaceae	g__Pseudomonas_E_647464	s__khavaziana	ASV2275
	1787	d__Bacteria	p__Proteobacteria	c__Gammaproteobacteria	o__QQUJ01	f__QQUJ01	g__QQUJ01	NA	ASV2278
	1788	d__Bacteria	p__Proteobacteria	c__Alphaproteobacteria	o__Rhizobiales_A_502138	f__Devosiaceae	g__Maritalea	NA	ASV2282
	1789	d__Bacteria	p__Desulfobacterota_I	c__Desulfobacteria	o__Desulfobacterales	f__SG8-13	g__SG8-13	s__sp001303025	ASV2285
	1790	d__Bacteria	p__Actinobacteriota	c__Acidimicrobiia_401430	o__IMCC26256	f__PALSA-555	g__SHUY01	NA	ASV2286
	1791	d__Bacteria	p__Planctomycetota	c__Phycisphaerae	o__UBA1845	f__Fen-1342	g__CAADGM01	NA	ASV2287
	1792	d__Bacteria	p__Proteobacteria	c__Alphaproteobacteria	o__Geminicoccales	f__Geminicoccaceae	NA	NA	ASV2288
	1793	d__Bacteria	p__Proteobacteria	c__Alphaproteobacteria	NA	NA	NA	NA	ASV2289
	1794	d__Archaea	p__Thermoplasmatota	c__E2	o__DHVEG-1	f__DHVEG-1	g__SM1-50	s__sp002496355	ASV2290
	1795	d__Bacteria	p__Proteobacteria	c__Gammaproteobacteria	NA	NA	NA	NA	ASV2291
	1796	d__Bacteria	p__Gemmatimonadota	c__Gemmatimonadetes	o__KS3-K002	f__JABDQB01	g__JAAXHJ01	s__sp009838765	ASV2295
	1797	d__Bacteria	p__Bacteroidota	c__Bacteroidia	o__Bacteroidales	f__VadinHA17_874699	g__DRPN01	NA	ASV2299
	1798	d__Bacteria	p__Proteobacteria	c__Gammaproteobacteria	o__Enterobacterales_A_737866	f__Vibrionaceae	g__Vibrio_678715	NA	ASV2300
	1799	d__Bacteria	p__Chloroflexota	c__Dehalococcoidia	o__Dehalococcoidales	f__W498	g__W498	NA	ASV2301
	1800	d__Bacteria	p__Bacteroidota	c__Bacteroidia	o__Flavobacteriales_877923	f__Crocinitomicaceae	g__Brumimicrobium	s__sp002734085	ASV2305
	1801	d__Bacteria	p__Actinobacteriota	c__Acidimicrobiia_401430	o__Acidimicrobiales	f__UBA8139	g__Rhabdothermincola	s__sediminis	ASV2312
	1802	d__Bacteria	p__Acidobacteriota	c__Thermoanaerobaculia	o__Thermoanaerobaculales	NA	NA	NA	ASV2315
	1803	d__Bacteria	p__Proteobacteria	c__Gammaproteobacteria	o__Pseudomonadales_650716	f__HTCC2089_650716	NA	NA	ASV2316
	1804	d__Bacteria	p__Acidobacteriota	c__UBA6911	o__UBA6911	f__UBA6911	g__Gp18-AA60	s__sp003225335	ASV2319
	1805	d__Bacteria	p__Desulfobacterota_I	c__Desulfobulbia	o__Desulfobulbales	f__Desulfurivibrionaceae	NA	NA	ASV2320
	1806	d__Bacteria	p__Firmicutes_D	c__Bacilli	o__Thermoactinomycetales_367866	f__DSM-45169_367864	NA	NA	ASV2321
	1807	d__Bacteria	p__Acidobacteriota	c__Acidobacteriae	o__UBA7540	f__UBA7540	g__SCRD01	s__sp004298155	ASV2322
	1808	d__Bacteria	p__Proteobacteria	c__Alphaproteobacteria	o__Bin65	f__Bin65	g__Bin65	NA	ASV2323
	1809	d__Bacteria	p__Myxococcota_A_473307	c__Polyangia_463783	o__HGW-17	f__HGW-17	g__HGW-17	s__sp002841905	ASV2324
	1810	d__Bacteria	p__Actinobacteriota	c__Acidimicrobiia_402965	NA	NA	NA	NA	ASV2333
	1811	d__Bacteria	p__Planctomycetota	c__Phycisphaerae	o__Phycisphaerales	NA	NA	NA	ASV2334
	1812	d__Archaea	p__Thermoproteota	c__Nitrososphaeria_A	o__Nitrososphaerales	NA	NA	NA	ASV2336
	1813	d__Bacteria	p__Patescibacteria	c__Paceibacteria	o__Paceibacterales	NA	NA	NA	ASV2337
	1814	d__Bacteria	p__Spirochaetota	c__Spirochaetia	o__SZUA-6	f__Bin103	g__Bin103	s__sp002238925	ASV2341
	1815	d__Bacteria	p__Proteobacteria	c__Gammaproteobacteria	o__Enterobacterales_A_737866	f__Vibrionaceae	g__Vibrio_678715	s__Vibrio agarilyticus	ASV2344
	1816	d__Bacteria	p__Dependentiae	c__Babeliae	o__Babeliales	NA	NA	NA	ASV2347
	1817	d__Bacteria	p__Bacteroidota	c__Bacteroidia	o__Bacteroidales	f__GCA-2748055	g__GCA-2748055	NA	ASV2355
	1818	d__Bacteria	p__Bacteroidota	c__Ignavibacteria	o__Ignavibacteriales	f__Melioribacteraceae	NA	NA	ASV2356
	1819	d__Bacteria	p__Acidobacteriota	c__UBA6911	o__UBA6911	f__UBA6911	g__Gp18-AA60	NA	ASV2357
	1820	d__Bacteria	p__Desulfobacterota_I	c__Desulfobacteria	o__Desulfobacterales	NA	NA	NA	ASV2358
	1821	d__Bacteria	p__Spirochaetota	c__Spirochaetia	o__SZUA-6	f__Bin103	g__Bin103	s__sp002238925	ASV2363
	1822	d__Bacteria	p__Proteobacteria	c__Gammaproteobacteria	o__Pseudomonadales_660879	f__Moraxellaceae	g__Acinetobacter	s__albensis	ASV2364
	1823	d__Bacteria	p__Myxococcota_A_473307	c__Polyangia_463783	o__Polyangiales	f__SG8-38	g__SG8-38	NA	ASV2365
	1824	d__Bacteria	p__Firmicutes_D	c__Bacilli	o__Bacillales_D_310495	f__Halobacillaceae	NA	NA	ASV2366
	1825	d__Bacteria	p__Firmicutes_D	c__Bacilli	o__Bacillales_G_286742	f__Bacillaceae_286710	g__Pseudalkalibacillus_286710	s__Pseudalkalibacillus berkeleyi	ASV2367
	1826	d__Bacteria	p__Zixibacteria	NA	NA	NA	NA	NA	ASV2368
	1827	d__Bacteria	p__Chloroflexota	c__Dehalococcoidia	o__Dehalococcoidales	NA	NA	NA	ASV2369
	1828	d__Archaea	p__Thermoplasmatota	c__E2	o__DHVEG-1	f__DHVEG-1	g__SM1-50	s__sp002496355	ASV2372
	1829	d__Bacteria	p__Firmicutes_D	c__Bacilli	o__Lactobacillales	f__Streptococcaceae	g__Lactococcus_A_343306	s__carnosus	ASV2374
	1830	d__Bacteria	p__Proteobacteria	c__Alphaproteobacteria	o__Sphingomonadales	f__Sphingomonadaceae	g__Alteraurantiacibacter	NA	ASV2380
	1831	d__Bacteria	p__Acidobacteriota	c__Vicinamibacteria	o__Vicinamibacterales	f__SCN-69-37	g__SCN-69-37	s__sp001724025	ASV2381
	1832	d__Bacteria	p__Proteobacteria	c__Gammaproteobacteria	o__Pseudomonadales_660954	f__HTCC2089_660954	g__SZUA-309	s__sp003228415	ASV2382
	1833	d__Bacteria	p__Proteobacteria	c__Gammaproteobacteria	o__HK1	f__HK1	g__HK1	s__sp000583135	ASV2383
	1834	d__Archaea	p__Thermoproteota	c__Bathyarchaeia	o__TCS64	f__TCS64	g__GCA-2726865	s__sp002726865	ASV2386
	1835	d__Archaea	p__Thermoproteota	c__Bathyarchaeia	o__B26-1	f__BA1	g__BA2	s__sp001399795	ASV2387
	1836	d__Bacteria	p__Zixibacteria	c__MSB-5A5_778960	o__GN15	f__PGXB01	NA	NA	ASV2388
	1837	d__Bacteria	p__Proteobacteria	c__Gammaproteobacteria	o__Woeseiales	f__Woeseiaceae	g__SP4260	NA	ASV2389
	1838	d__Bacteria	p__Latescibacterota	c__Latescibacteria	o__Latescibacterales	f__Latescibacteraceae	g__Latescibacter	s__anaerobius	ASV2390
	1839	d__Bacteria	p__Planctomycetota	c__Planctomycetia	o__Pirellulales	f__Lacipirellulaceae	NA	NA	ASV2394
	1840	d__Archaea	p__Nanoarchaeota	c__Nanoarchaeia	o__Pacearchaeales	f__GW2011-AR1	g__BMS3ABIN17	s__sp002897655	ASV2395
	1841	d__Bacteria	p__Chloroflexota	c__Anaerolineae	o__Promineofilales	f__Promineofilaceae	NA	NA	ASV2397
	1842	d__Bacteria	p__Chloroflexota	c__Anaerolineae	NA	NA	NA	NA	ASV2400
	1843	d__Bacteria	p__Proteobacteria	c__Gammaproteobacteria	NA	NA	NA	NA	ASV2401
	1844	d__Bacteria	p__Proteobacteria	c__Alphaproteobacteria	NA	NA	NA	NA	ASV2402
	1845	d__Bacteria	p__Proteobacteria	c__Alphaproteobacteria	o__Rhizobiales_A_504723	NA	NA	NA	ASV2403
	1846	d__Bacteria	p__Firmicutes_D	c__Bacilli	o__Lactobacillales	f__Streptococcaceae	g__Lactococcus_A_343306	NA	ASV2404
	1847	d__Bacteria	p__Proteobacteria	c__Alphaproteobacteria	o__Rhodospirillales_505895	NA	NA	NA	ASV2405
	1848	d__Bacteria	p__Zixibacteria	c__MSB-5A5_778960	o__JAABVY01	f__JAABVY01	g__JAABVY01	NA	ASV2409
	1849	d__Bacteria	p__Proteobacteria	c__Gammaproteobacteria	o__Halothiobacillales	f__Halothiobacillaceae_605200	g__Halothiobacillus	s__kellyi	ASV2410
	1850	d__Bacteria	p__Desulfobacterota_B	c__Binatia	o__UBA1149	f__UBA1149	g__UBA1149	NA	ASV2417
	1851	d__Bacteria	p__Verrucomicrobiota	c__Kiritimatiellae_777785	o__SLAD01	f__WLWN01	g__WLWN01	s__sp012103575	ASV2419
	1852	d__Bacteria	p__Proteobacteria	c__Gammaproteobacteria	o__Pseudomonadales_660954	f__HTCC2089_660954	g__SZUA-309	s__sp003228415	ASV2422
	1853	d__Bacteria	p__Chloroflexota	c__Dehalococcoidia	o__UBA3495	f__UBA2588	g__UBA2588	s__sp002723125	ASV2425
	1854	d__Bacteria	p__Desulfobacterota_I	c__Desulfobacteria	o__Desulfobacterales	NA	NA	NA	ASV2429
	1855	d__Bacteria	p__Acidobacteriota	c__Mor1	o__Mor1	f__Mor1	g__Mor1	NA	ASV2433
	1856	d__Bacteria	p__Acidobacteriota	c__Vicinamibacteria	o__Fen-336	f__Fen-336	g__WYBL01	s__sp011526565	ASV2434
	1857	d__Bacteria	p__Chloroflexota	c__Anaerolineae	o__B4-G1	f__DUEL01	g__SpSt-77	NA	ASV2436
	1858	d__Bacteria	p__Chloroflexota	c__Anaerolineae	o__Anaerolineales	f__Anaerolineaceae_409200	g__Pelolinea	s__submarina	ASV2437
	1859	d__Bacteria	p__Chloroflexota	c__Anaerolineae	NA	NA	NA	NA	ASV2438
	1860	d__Bacteria	p__Desulfobacterota_I	c__DSM-4660	o__Desulfatiglandales	f__HGW-15	NA	NA	ASV2440
	1861	d__Bacteria	p__Actinobacteriota	c__Acidimicrobiia_401430	o__Acidimicrobiales	f__SIRW01	g__SIRW01	s__sp004366205	ASV2442
	1862	d__Bacteria	p__Gemmatimonadota	c__Gemmatimonadetes	o__KS3-K002	f__JABDQB01	g__JAAXHJ01	s__sp009838765	ASV2443
	1863	d__Bacteria	p__Actinobacteriota	c__Thermoleophilia	o__Miltoncostaeales	f__Miltoncostaeaceae	g__Miltoncostaea	s__oceani	ASV2444
	1864	d__Bacteria	p__Campylobacterota	c__Campylobacteria	o__Campylobacterales	f__Sulfurovaceae	g__UBA1140	NA	ASV2446
	1865	d__Archaea	p__Halobacteriota	c__Archaeoglobi	o__Archaeoglobales	f__Archaeoglobaceae	g__Archaeoglobus_C_2713	NA	ASV2448
	1866	d__Bacteria	p__Planctomycetota	c__Phycisphaerae	o__Phycisphaerales	NA	NA	NA	ASV2449
	1867	d__Bacteria	p__Proteobacteria	c__Gammaproteobacteria	o__Enterobacterales_A_737866	f__Vibrionaceae	g__Vibrio_678715	s__Vibrio rumoiensis	ASV2450
	1868	d__Bacteria	p__Proteobacteria	c__Gammaproteobacteria	o__Pseudomonadales_660879	f__Moraxellaceae	g__Psychrobacter	NA	ASV2451
	1869	d__Bacteria	p__Desulfobacterota_I	c__Desulfobacteria	o__C00003060	f__C00003060	g__S7086C20	NA	ASV2453
	1870	d__Bacteria	p__Proteobacteria	c__Gammaproteobacteria	o__GCA-2729495	f__GCA-2729495	NA	NA	ASV2454
	1871	d__Bacteria	p__Chloroflexota	c__Dehalococcoidia	o__Dehalococcoidales	NA	NA	NA	ASV2457
	1872	d__Bacteria	p__Acidobacteriota	c__Mor1	o__Mor1	f__Mor1	g__Mor1	NA	ASV2461
	1873	d__Bacteria	p__Proteobacteria	c__Alphaproteobacteria	o__Rhizobiales_A_504705	f__Beijerinckiaceae	g__Methylocystis	NA	ASV2465
	1874	d__Bacteria	p__Bacteroidota	c__Bacteroidia	o__Flavobacteriales_877923	f__Flavobacteriaceae	g__Mangrovimonas_A_827116	s__xylaniphaga	ASV2466
	1875	d__Bacteria	p__Bacteroidota	c__Ignavibacteria	o__Ignavibacteriales	f__Melioribacteraceae	NA	NA	ASV2468
	1876	d__Bacteria	p__Desulfobacterota_I	c__Desulfobulbia	o__Desulfobulbales	f__Desulfurivibrionaceae	NA	NA	ASV2469
	1877	d__Bacteria	p__Chloroflexota	c__Dehalococcoidia	o__Dehalococcoidales	NA	NA	NA	ASV2472
	1878	d__Bacteria	p__Bacteroidota	c__Bacteroidia	o__Bacteroidales	f__UBA10428	g__JAAAOM01	NA	ASV2473
	1879	d__Bacteria	p__Firmicutes_A	c__Clostridia_258483	o__Clostridiales	f__Clostridiaceae_222000	g__Clostridium_F	s__tepidum	ASV2475
	1880	d__Bacteria	p__Chloroflexota	c__Anaerolineae	o__Anaerolineales	f__UBA4823	g__UBA6092	NA	ASV2483
	1881	d__Bacteria	p__Spirochaetota	c__Spirochaetia	o__SZUA-6	f__Bin103	g__Bin103	NA	ASV2485
	1882	d__Bacteria	p__Actinobacteriota	c__Acidimicrobiia_402965	o__UBA5794	f__UBA5794	g__SZUA-442	s__sp003235475	ASV2487
	1883	d__Bacteria	p__Firmicutes_A	c__Clostridia_258483	o__Peptostreptococcales	f__Peptostreptococcaceae_256921	NA	NA	ASV2490
	1884	d__Bacteria	p__Planctomycetota	c__Phycisphaerae	o__Phycisphaerales	NA	NA	NA	ASV2491
	1885	d__Bacteria	p__Bacteroidota	c__Rhodothermia	o__Rhodothermales	f__UBA10348	g__1-14-0-65-60-17	s__sp002787815	ASV2492
	1886	d__Bacteria	p__Firmicutes_D	c__Bacilli	o__Tumebacillales	f__Tumebacillaceae	g__Tumebacillus_A	s__flagellatus	ASV2493
	1887	d__Bacteria	p__Myxococcota_A_473307	c__Bradymonadia	o__UBA7976	NA	NA	NA	ASV2494
	1888	d__Bacteria	p__Planctomycetota	c__Planctomycetia	o__Planctomycetales	NA	NA	NA	ASV2496
	1889	d__Bacteria	p__Proteobacteria	c__Alphaproteobacteria	o__Rhizobiales_A_504705	NA	NA	NA	ASV2497
	1890	d__Bacteria	p__Proteobacteria	c__Gammaproteobacteria	o__Halothiobacillales	f__Halothiobacillaceae_605198	g__Guyparkeria	NA	ASV2498
	1891	d__Bacteria	p__Chloroflexota	c__Dehalococcoidia	o__Dehalococcoidales	f__UBA2162	g__MGML01	s__sp001796415	ASV2499
	1892	d__Bacteria	p__Proteobacteria	c__Gammaproteobacteria	o__Nitrococcales	f__Aquisalimonadaceae	NA	NA	ASV2500
	1893	d__Bacteria	p__Desulfobacterota_I	c__Syntrophobacteria	o__Syntrophobacterales	NA	NA	NA	ASV2501
	1894	d__Bacteria	p__Zixibacteria	NA	NA	NA	NA	NA	ASV2502
	1895	d__Bacteria	p__Chloroflexota	c__Anaerolineae	o__B4-G1	f__DUEL01	g__SpSt-77	NA	ASV2504
	1896	d__Bacteria	p__Proteobacteria	c__Alphaproteobacteria	NA	NA	NA	NA	ASV2507
	1897	d__Archaea	p__Asgardarchaeota	c__Thorarchaeia	o__Thorarchaeales	f__Thorarchaeaceae	g__SMTZ1-45	s__sp011364905	ASV2509
	1898	d__Bacteria	p__Desulfobacterota_I	c__Desulfobacteria	o__Desulfobacterales	f__SG8-13	g__SG8-13	s__sp001303025	ASV2516
	1899	d__Archaea	p__Nanoarchaeota	c__Nanoarchaeia	o__Pacearchaeales	f__GW2011-AR1	g__BMS3ABIN17	s__sp002897655	ASV2521
	1900	d__Bacteria	p__Bacteroidota	c__Bacteroidia	o__Flavobacteriales_877923	f__Flavobacteriaceae	g__Actibacter	NA	ASV2527
	1901	d__Bacteria	p__Bacteroidota	c__Ignavibacteria	o__Ignavibacteriales	f__Ignavibacteriaceae_785640	NA	NA	ASV2528
	1902	d__Bacteria	p__Proteobacteria	c__Gammaproteobacteria	o__Pseudomonadales_660954	f__HTCC2089_660954	g__SZUA-521	s__sp003248125	ASV2529
	1903	d__Bacteria	p__Krumholzibacteriota	c__Krumholzibacteria	o__LZORAL124-64-63	f__LZORAL124-64-63	NA	NA	ASV2530
	1904	d__Bacteria	p__Spirochaetota	c__Spirochaetia	NA	NA	NA	NA	ASV2534
	1905	d__Bacteria	p__Desulfobacterota_B	c__Binatia	o__HRBIN30	f__HRBIN30	g__HRBIN30	NA	ASV2543
	1906	d__Bacteria	p__Planctomycetota	c__Brocadiae	o__SM23-32	f__SM23-32	g__SM23-32	s__sp001303885	ASV2544
	1907	d__Bacteria	p__Planctomycetota	c__Planctomycetia	o__Pirellulales	f__Thermoguttaceae	NA	NA	ASV2546
	1908	d__Bacteria	p__Proteobacteria	c__Gammaproteobacteria	o__Pseudomonadales_650612	f__Pseudohongiellaceae	g__UBA9145	NA	ASV2547
	1909	d__Bacteria	p__Chloroflexota	c__Dehalococcoidia	o__GIF9	f__AB-539-J10	g__SKVJ01	s__sp003552125	ASV2548
	1910	d__Bacteria	p__Chloroflexota	c__Dehalococcoidia	o__UBA2963	f__UBA2963	g__UBA2963	s__sp002725515	ASV2549
	1911	d__Bacteria	p__Desulfobacterota_I	c__DSM-4660	o__Desulfatiglandales	f__Desulfatiglandaceae	g__UBA5623	NA	ASV2550
	1912	d__Bacteria	p__Proteobacteria	c__Alphaproteobacteria	o__Sneathiellales_505152	f__Sneathiellaceae_505152	g__Sneathiella	s__chinensis	ASV2551
	1913	d__Bacteria	p__Chloroflexota	c__Dehalococcoidia	o__Dehalococcoidales	NA	NA	NA	ASV2552
	1914	d__Bacteria	p__Proteobacteria	c__Alphaproteobacteria	NA	NA	NA	NA	ASV2553
	1915	d__Bacteria	p__Bacteroidota	c__Rhodothermia	o__Balneolales	f__Balneolaceae	NA	NA	ASV2554
	1916	d__Bacteria	p__QNDG01	c__QNDG01	o__QNDG01	f__DTFT01	g__DTFT01	NA	ASV2556
	1917	d__Bacteria	p__Chloroflexota	c__Dehalococcoidia	o__Dehalococcoidales	f__W498	g__W498	s__sp011170285	ASV2558
	1918	d__Bacteria	p__Acidobacteriota	c__Thermoanaerobaculia	o__UBA5704	f__UBA5704	NA	NA	ASV2559
	1919	d__Bacteria	p__Planctomycetota	c__Phycisphaerae	o__SM23-33	f__SM23-33	g__MWDR01	s__sp002071695	ASV2561
	1920	d__Bacteria	p__Proteobacteria	c__Gammaproteobacteria	NA	NA	NA	NA	ASV2562
	1921	d__Bacteria	p__Gemmatimonadota	c__Gemmatimonadetes	o__KS3-K002	f__JABDQB01	g__JAAXHJ01	s__sp009838765	ASV2566
	1922	d__Bacteria	p__Proteobacteria	c__Gammaproteobacteria	o__Woeseiales	f__Woeseiaceae	g__SP4260	NA	ASV2570
	1923	d__Bacteria	p__Desulfobacterota_I	c__Desulfobulbia	o__Desulfobulbales	f__Desulfocapsaceae	g__Desulfofustis	s__glycolicus	ASV2572
	1924	d__Bacteria	p__Planctomycetota	NA	NA	NA	NA	NA	ASV2573
	1925	d__Bacteria	p__Bacteroidota	c__Bacteroidia	o__Bacteroidales	f__VadinHA17_874699	g__DRPN01	NA	ASV2574
	1926	d__Bacteria	p__Chloroflexota	c__Dehalococcoidia	o__Dehalococcoidales	f__W498	g__W498	NA	ASV2575
	1927	d__Bacteria	p__Desulfobacterota_I	c__Desulfobulbia	o__Desulfobulbales	f__Desulfocapsaceae	g__Desulfofustis	s__glycolicus	ASV2576
	1928	d__Bacteria	p__Patescibacteria	c__ABY1	o__BM507	NA	NA	NA	ASV2577
	1929	d__Bacteria	p__Proteobacteria	c__Alphaproteobacteria	o__Rhizobiales_A_504705	f__Xanthobacteraceae_503485	NA	NA	ASV2581
	1930	d__Bacteria	p__Firmicutes_F	c__Halanaerobiia	o__Halobacteroidales	f__Halobacteroidaceae	g__Orenia_42969	s__Orenia marismortui	ASV2582
	1931	d__Bacteria	p__Bacteroidota	c__Bacteroidia	o__Bacteroidales	f__GCA-2748055	g__GCA-2748055	s__sp011056635	ASV2586
	1932	d__Bacteria	p__Gemmatimonadota	c__Gemmatimonadetes	o__Longimicrobiales	f__UBA6960	g__PXFI01	s__sp003564295	ASV2589
	1933	d__Bacteria	p__Desulfobacterota_I	c__Dissulfuribacteria	o__Dissulfuribacterales	NA	NA	NA	ASV2590
	1934	d__Bacteria	p__Planctomycetota	c__Phycisphaerae	o__SM23-33	f__SM23-33	g__MWDR01	s__sp002071695	ASV2591
	1935	d__Bacteria	p__Firmicutes_A	c__Clostridia_258483	o__Acetivibrionales	f__DSM-8532	g__Thermoclostridium_A	NA	ASV2592
	1936	d__Bacteria	p__Firmicutes_D	c__Bacilli	o__Haloplasmatales_A	f__Haloplasmataceae	g__Haloplasma	s__contractile	ASV2593
	1937	d__Bacteria	p__Zixibacteria	c__MSB-5A5_778959	o__UM-FILTER-46-8	f__UM-FILTER-46-8	g__UM-FILTER-46-8	s__sp002791595	ASV2594
	1938	d__Bacteria	p__AABM5-125-24	NA	NA	NA	NA	NA	ASV2595
	1939	d__Bacteria	p__Acidobacteriota	c__Vicinamibacteria	o__Bin61	f__SMYC01	g__SMYC01	s__sp004356105	ASV2596
	1940	d__Bacteria	p__Acidobacteriota	c__Thermoanaerobaculia	o__UBA5704	f__UBA5704	NA	NA	ASV2603
	1941	d__Bacteria	p__Bacteroidota	c__Bacteroidia	o__Bacteroidales	f__GCA-2748055	g__GCA-2748055	NA	ASV2605
	1942	d__Bacteria	p__Firmicutes_D	c__Bacilli	o__Bacillales_B_302584	NA	NA	NA	ASV2611
	1943	d__Bacteria	p__Proteobacteria	c__Gammaproteobacteria	o__Enterobacterales_A_737866	f__Enterobacteriaceae_A	g__Escherichia_710834	s__Escherichia coli	ASV2618
	1944	d__Bacteria	p__Planctomycetota	c__Planctomycetia	o__Planctomycetales	f__Mal52	g__Symmachiella	NA	ASV2621
	1945	d__Bacteria	p__Actinobacteriota	c__Aquicultoria	o__Aquicultorales	f__Aquicultoraceae	g__Aquicultor	NA	ASV2623
	1946	d__Bacteria	p__Marinisomatota	c__Marinisomatia	o__SCGC-AAA003-L08	f__TS1B11	g__TS1B11	s__sp004124295	ASV2627
	1947	d__Bacteria	p__Acidobacteriota	c__UBA6911	o__UBA6911	f__UBA6911	g__Gp18-AA60	NA	ASV2638
	1948	d__Bacteria	p__Acidobacteriota	c__Mor1	o__Mor1	f__Mor1	g__Mor1	NA	ASV2639
	1949	d__Archaea	p__Thermoproteota	c__Bathyarchaeia	o__B26-1	f__BA1	g__BA2	s__sp001399795	ASV2644
	1950	d__Bacteria	p__Proteobacteria	c__Gammaproteobacteria	NA	NA	NA	NA	ASV2646
	1951	d__Bacteria	p__Chloroflexota	c__Anaerolineae	o__4572-78	f__NAK82	g__NAK82	s__sp003130875	ASV2647
	1952	d__Bacteria	p__Desulfobacterota_I	c__Desulfobaccia	o__Desulfobaccales	f__Desulfobaccaceae	g__Desulfobacca	NA	ASV2653
	1953	d__Bacteria	p__Myxococcota_A_473307	c__Polyangia_463783	o__Polyangiales	f__SG8-38	g__SG8-38	NA	ASV2654
	1954	d__Bacteria	p__Acidobacteriota	c__Thermoanaerobaculia	o__UBA5704	f__UBA5704	NA	NA	ASV2655
	1955	d__Bacteria	p__Proteobacteria	c__Alphaproteobacteria	o__Rhizobiales_A_502138	NA	NA	NA	ASV2656
	1956	d__Bacteria	p__Firmicutes_A	c__Clostridia_258483	o__Acetivibrionales	f__DSM-8532	NA	NA	ASV2659
	1957	d__Bacteria	p__Cyanobacteria	c__Vampirovibrionia	o__Gastranaerophilales	f__UBA9579	g__GWF2-37-15	s__sp001784565	ASV2660
	1958	d__Bacteria	p__Firmicutes_D	c__Bacilli	o__Bacillales_D_310495	f__Halobacillaceae	g__Halobacillus_A_288294	NA	ASV2662
	1959	d__Bacteria	p__Myxococcota_A_473307	c__UBA9160	o__UBA9160	NA	NA	NA	ASV2667
	1960	d__Bacteria	p__Proteobacteria	c__Alphaproteobacteria	o__Caulobacterales	f__Parvularculaceae	g__Marinicaulis_488176	s__Marinicaulis sp001657385	ASV2669
	1961	d__Bacteria	p__Proteobacteria	c__Alphaproteobacteria	o__Parvibaculales	f__CGMCC-115125	g__Pyruvatibacter	NA	ASV2671
	1962	d__Archaea	p__Thermoplasmatota	c__E2	o__DHVEG-1	f__DHVEG-1	g__SM1-50	s__sp002496355	ASV2672
	1963	d__Bacteria	p__Proteobacteria	c__Gammaproteobacteria	NA	NA	NA	NA	ASV2673
	1964	d__Bacteria	p__Chloroflexota	c__Anaerolineae	o__Aggregatilineales	f__A4b	g__GCA-2699585	NA	ASV2674
	1965	d__Bacteria	p__Proteobacteria	c__Gammaproteobacteria	o__Methylococcales	f__Methylothermaceae	NA	NA	ASV2679
	1966	d__Bacteria	p__Proteobacteria	c__Gammaproteobacteria	o__HK1	f__HK1	g__HK1	s__sp000583135	ASV2686
	1967	d__Bacteria	p__Proteobacteria	c__Gammaproteobacteria	o__Pseudomonadales_637066	f__Oleiphilaceae_637066	g__Marinobacter_A_637054	s__zhanjiangensis	ASV2687
	1968	d__Archaea	p__Nanoarchaeota	c__Nanoarchaeia	o__Pacearchaeales	f__GW2011-AR1	g__BMS3ABIN17	s__sp002897655	ASV2691
	1969	d__Bacteria	p__Proteobacteria	c__Gammaproteobacteria	o__Thiomicrospirales	f__Thiomicrospiraceae	g__Hydrogenovibrio	s__marinus	ASV2693
	1970	d__Bacteria	p__Planctomycetota	c__Brocadiae	o__SM23-32	f__SM23-32	g__B1Sed10-231	s__sp003551305	ASV2694
	1971	d__Bacteria	p__Spirochaetota	c__Spirochaetia	o__SZUA-6	f__Bin103	g__Bin103	s__sp002238925	ASV2702
	1972	d__Bacteria	p__Firmicutes_D	c__Bacilli	o__Lactobacillales	f__Lactobacillaceae	g__Lactobacillus	s__helveticus	ASV2703
	1973	d__Bacteria	p__Spirochaetota	c__Spirochaetia	o__SZUA-6	f__Bin103	g__Bin103	s__sp002238925	ASV2705
	1974	d__Bacteria	p__Bacteroidota	c__Bacteroidia	o__Bacteroidales	NA	NA	NA	ASV2706
	1975	d__Bacteria	p__Firmicutes_D	c__Bacilli	o__Paenibacillales	f__Paenibacillaceae_367444	NA	NA	ASV2707
	1976	d__Bacteria	p__Bacteroidota	c__Rhodothermia	o__Balneolales	f__Balneolaceae	NA	NA	ASV2710
	1977	d__Bacteria	p__Planctomycetota	c__Planctomycetia	o__Pirellulales	f__Lacipirellulaceae	g__HG15A2	s__sp007741515	ASV2711
	1978	d__Bacteria	p__Proteobacteria	c__Gammaproteobacteria	o__QQUJ01	f__QQUJ01	g__QQUJ01	NA	ASV2714
	1979	d__Bacteria	p__WOR-3	c__UBA3072	o__UBA3072	f__B12-G15	g__DTHG01	NA	ASV2715
	1980	d__Bacteria	p__Acidobacteriota	c__Vicinamibacteria	o__Bin61	f__SMYC01	g__SMYC01	s__sp004356105	ASV2716
	1981	d__Bacteria	p__Desulfobacterota_I	c__DSM-4660	o__Desulfatiglandales	f__Desulfatiglandaceae	g__UBA5623	s__sp900258555	ASV2722
	1982	d__Archaea	p__Nanoarchaeota	c__Nanoarchaeia	o__Pacearchaeales	f__GW2011-AR1	g__BMS3ABIN17	s__sp002897655	ASV2723
	1983	d__Bacteria	p__Myxococcota_A_473307	c__UBA9160	o__UBA9160	NA	NA	NA	ASV2724
	1984	d__Bacteria	p__Firmicutes_F	c__Halanaerobiia	o__DY22613	f__DY22613	g__Anoxybacter	NA	ASV2725
	1985	d__Bacteria	p__Proteobacteria	c__Gammaproteobacteria	o__Xanthomonadales_616050	f__SZUA-36	NA	NA	ASV2729
	1986	d__Bacteria	p__Proteobacteria	c__Gammaproteobacteria	o__HK1	f__HK1	g__HK1	s__sp000583135	ASV2730
	1987	d__Bacteria	p__Desulfobacterota_I	c__Desulfobacteria	o__Desulfobacterales	f__Desulfosarcinaceae	NA	NA	ASV2731
	1988	d__Bacteria	p__Chloroflexota	c__Dehalococcoidia	o__UBA2979	f__UBA2979	g__VXMT01	s__sp009840945	ASV2732
	1989	d__Bacteria	p__Firmicutes_A	c__Clostridia_258483	o__Tissierellales	f__SIT17	g__Senegalia	s__massiliensis	ASV2736
	1990	d__Bacteria	p__Proteobacteria	c__Gammaproteobacteria	o__GCA-2729495	f__GCA-2729495	g__GCA-002729875	s__sp002688175	ASV2737
	1991	d__Bacteria	p__Planctomycetota	c__Phycisphaerae	o__UBA1845	f__UBA1845	NA	NA	ASV2738
	1992	d__Bacteria	p__Firmicutes_B_370539	c__Desulfitobacteriia	o__Heliobacteriales	f__Heliobacteriaceae	g__Heliorestis	NA	ASV2739
	1993	d__Bacteria	p__Bacteroidota	c__Bacteroidia	o__Chitinophagales	f__Saprospiraceae	g__Membranicola	NA	ASV2740
	1994	d__Bacteria	p__Myxococcota_A_473307	c__Polyangia_463783	o__DRWM01	f__JAAZOP01	g__JAAZOP01	s__sp011367485	ASV2742
	1995	d__Bacteria	p__Patescibacteria	c__Paceibacteria	o__UBA9983_A	NA	NA	NA	ASV2743
	1996	d__Archaea	p__Asgardarchaeota	c__Thorarchaeia	o__Thorarchaeales	f__Thorarchaeaceae	g__TEKIR-14	s__sp004524445	ASV2748
	1997	d__Bacteria	p__Chloroflexota	c__Anaerolineae	NA	NA	NA	NA	ASV2750
	1998	d__Bacteria	p__Firmicutes_D	c__Bacilli	o__Lactobacillales	f__Streptococcaceae	g__Streptococcus	s__parasuis	ASV2751
[truncated: 563 more rows]

## Sheet: Supplementary table 4
		Supplementary Table 4: ASV Abundance Table. This table displays the abundance of each ASV across all samples, providing a detailed view of microbial distribution and prevalence in the study.
		ASV1	ASV2	ASV3	ASV4	ASV5	ASV6	ASV7	ASV8	ASV9	ASV10	ASV11	ASV12	ASV13	ASV14	ASV15	ASV16	ASV17	ASV18	ASV19	ASV20	ASV21	ASV22	ASV23	ASV24	ASV25	ASV26	ASV27	ASV28	ASV29	ASV30	ASV31	ASV32	ASV33	ASV34	ASV35	ASV36	ASV37	ASV38	ASV39	ASV40	ASV41	ASV42	ASV43	ASV44	ASV45	ASV46	ASV47	ASV48
	1	182	0	0	0	0	0	0	0	0	0	20	0	63	0	0	0	0	0	66	0	0	0	0	0	0	0	0	25	0	0	0	0	0	13	0	0	0	0	54	0	0	0	0	0	0	0	18	39
	2	150	0	0	1760	0	673	0	0	0	0	0	0	137	0	16	0	0	0	32	0	0	0	0	0	0	491	0	0	2564	0	0	0	24	155	0	0	0	0	14	0	32	0	0	584	54	0	11	0
	3	420	0	0	0	0	0	0	0	0	0	17	0	37	0	0	0	0	0	60	0	0	0	0	0	0	0	0	0	0	0	24	0	0	0	0	0	0	0	78	0	0	0	0	0	18	0	38	72
	4	1450	0	0	0	0	0	0	0	0	0	0	110	0	0	0	0	0	0	38	0	0	0	0	0	0	0	0	0	0	0	119	66	0	0	0	0	0	0	0	0	0	0	0	0	0	0	88	101
	5	784	0	0	0	0	0	0	0	0	0	0	0	0	0	0	0	0	0	0	0	0	0	0	0	0	0	0	0	0	0	0	0	0	0	0	0	0	0	0	0	0	0	0	0	0	0	64	0
	6	0	0	0	0	0	197	319	0	0	63	28	0	0	0	0	0	0	47	0	0	130	0	53	0	0	0	0	0	0	0	0	0	0	354	0	0	0	0	28	0	0	80	0	0	0	6	0	109
	7	24	0	0	0	0	15	262	144	0	137	139	0	34	0	0	0	0	66	92	0	25	0	64	0	0	0	0	0	0	0	61	0	0	270	0	0	0	0	79	0	0	180	0	0	28	0	0	319
	8	750	0	0	0	0	13	0	0	0	49	32	0	117	0	0	0	0	0	70	0	0	0	0	0	0	0	0	140	0	0	23	0	178	19	0	0	0	0	90	0	55	0	0	0	142	0	64	24
	9	1744	0	0	0	0	18	0	0	0	33	917	51	113	0	0	0	0	88	350	0	0	0	0	0	0	0	0	125	0	0	82	15	268	0	0	0	0	0	162	0	62	0	0	0	84	0	105	60
	10	923	0	0	0	0	0	0	0	0	205	576	0	158	0	0	0	0	93	241	0	0	0	0	0	0	0	0	158	0	0	20	0	190	0	0	0	0	0	162	0	49	0	0	0	151	0	57	21
	11	142	0	0	0	0	0	36	0	0	0	83	0	0	0	0	0	0	24	34	0	0	0	0	0	0	0	0	0	0	0	0	0	0	69	0	0	0	0	44	0	0	0	0	0	0	0	0	188
	12	1090	0	0	0	0	0	0	0	0	0	302	0	11	0	0	0	0	216	83	0	0	0	0	0	0	0	0	0	0	0	22	0	0	0	0	0	0	0	63	0	26	0	0	0	0	0	89	0
	13	87	0	0	0	0	688	2365	952	0	1293	42	0	83	0	0	0	0	37	80	0	343	0	270	0	0	0	0	0	0	0	0	0	14	143	0	0	0	0	0	2188	12	55	0	0	48	0	0	0
	14	233	0	0	0	0	0	3082	3664	0	2683	38	0	10	0	0	0	0	55	45	0	48	0	1296	0	0	0	0	0	0	0	0	0	0	0	0	0	0	0	0	80	0	54	0	0	8	0	17	0
	15	778	0	0	0	0	109	439	1774	0	142	33	0	0	0	0	0	0	121	65	0	333	0	1328	0	0	0	0	0	49	0	0	0	0	46	0	0	0	0	18	65	0	437	0	0	0	0	44	0
	16	206	0	0	0	0	0	0	0	0	5	98	0	336	0	0	0	0	0	296	0	87	0	0	0	0	36	0	529	0	0	0	0	122	0	0	71	0	0	59	0	243	0	0	0	152	0	14	0
	17	524	0	0	0	0	0	0	0	0	0	267	0	41	0	0	0	0	277	23	0	0	80	0	0	0	0	48	95	0	117	311	100	96	0	0	137	0	0	134	0	61	0	0	0	0	0	37	0
	18	1242	0	0	0	0	0	0	0	0	0	608	112	0	0	0	0	0	818	0	0	0	362	0	0	0	0	186	96	0	332	392	406	0	0	0	147	0	0	153	0	0	0	0	0	0	0	81	0
	19	280	0	0	0	0	301	27	0	0	75	0	0	63	0	0	0	0	0	21	0	901	0	64	0	0	15	0	162	0	0	0	0	49	0	0	14	1037	0	38	0	108	0	0	0	28	0	16	0
	20	900	0	0	0	0	15	0	0	0	0	380	0	31	0	0	0	0	261	0	0	66	66	0	0	0	18	99	102	0	57	99	67	36	0	0	103	0	0	101	0	86	0	0	0	36	0	54	0
	21	1128	0	0	0	0	0	0	0	0	0	397	99	11	0	0	0	0	464	0	0	0	68	0	0	0	0	80	0	0	189	77	150	0	0	0	54	0	0	94	0	16	0	0	0	0	0	93	0
	22	332	0	0	0	0	0	0	0	0	0	32	0	0	0	0	0	0	21	50	0	0	0	0	0	0	0	0	0	0	0	24	23	0	37	0	0	0	0	0	0	0	0	0	0	0	0	26	195
	23	379	0	0	0	0	0	0	0	0	0	46	0	197	0	0	0	0	0	197	0	158	0	0	0	0	35	0	538	0	0	0	0	110	0	0	212	0	0	98	0	220	0	0	0	64	0	39	0
	24	619	0	0	0	0	0	0	0	0	0	120	0	123	0	0	0	0	38	46	0	49	60	0	0	0	21	0	174	0	28	193	68	194	0	0	535	0	0	105	0	151	0	0	0	103	0	32	0
	25	662	0	0	0	0	0	0	0	0	0	317	156	0	0	0	0	0	258	0	0	28	114	0	0	0	0	32	37	0	239	106	328	0	0	0	81	0	0	134	0	26	0	0	0	0	0	45	0
	26	443	1671	996	0	1845	0	0	0	0	0	0	0	0	0	0	808	457	0	60	0	0	0	0	0	0	0	0	0	0	0	25	26	0	0	0	0	0	34	19	0	0	0	0	0	18	0	26	147
	27	4973	0	0	0	0	21	0	0	0	0	0	1474	0	0	0	0	0	0	58	0	25	0	0	0	0	0	0	0	0	0	198	63	0	0	0	0	0	0	15	0	0	148	39	0	0	25	248	55
	28	557	1611	1860	0	2434	0	0	0	0	0	0	0	15	0	0	27	279	0	45	0	0	0	0	0	0	0	0	0	0	0	48	0	0	0	0	0	0	0	0	0	0	0	0	0	0	0	23	121
	29	3266	19	0	0	0	0	0	0	0	106	0	7	0	11	0	12	0	0	0	29	0	0	0	0	0	0	0	0	0	0	28	0	0	0	0	0	0	0	0	0	0	0	9	0	0	0	193	0
	30	109	1475	837	13	570	179	0	0	108	0	0	0	0	642	0	416	959	0	0	252	0	0	0	18	0	0	0	0	0	0	0	0	0	343	0	0	22	339	0	0	0	53	131	9	0	196	10	31
	31	0	169	139	0	163	574	0	0	139	26	0	0	18	789	0	2192	153	19	62	1451	72	0	0	197	0	0	0	30	0	0	83	0	0	217	0	0	66	28	89	0	0	319	1125	23	0	1266	0	46
	32	10	1449	1521	0	1142	22	0	0	29	67	0	0	13	89	0	463	981	0	24	70	0	0	0	896	0	0	0	0	0	10	21	0	0	41	0	0	0	295	0	0	0	647	712	0	0	587	0	0
	33	176	0	0	0	38	44	25	0	0	0	84	0	544	0	0	0	0	34	274	0	59	0	0	0	0	0	0	210	0	0	0	0	75	0	0	0	0	0	122	0	137	0	0	0	263	0	0	0
	34	2909	0	0	0	0	332	0	0	0	0	323	1456	13	0	7	0	0	47	171	681	60	0	0	0	0	0	0	41	0	0	276	18	177	33	0	0	13	0	52	0	39	0	0	22	0	0	146	138
	35	260	0	0	2359	0	265	0	0	470	0	0	0	20	28	486	0	0	14	43	0	0	0	0	0	0	24	0	0	158	0	0	0	43	75	224	0	0	300	18	0	0	0	0	1159	22	0	25	15
	36	539	0	0	835	0	46	0	0	2060	0	0	0	0	502	1907	0	0	13	37	161	0	0	0	1664	215	0	0	0	10	0	0	0	0	69	1125	0	0	756	0	0	0	0	0	190	0	0	23	0
	37	142	0	0	1648	0	384	0	0	906	0	0	0	54	1497	191	0	0	0	43	62	0	0	0	0	0	262	0	0	27	0	0	0	13	133	128	0	59	144	0	0	20	0	11	43	0	0	16	18
	38	102	0	0	400	0	251	0	0	2212	0	0	0	9	160	349	0	0	0	33	243	0	0	0	49	0	89	0	0	52	0	0	0	0	41	683	0	96	85	0	0	7	21	11	36	0	0	6	0
	39	1240	0	0	475	0	100	0	0	0	33	0	0	0	784	661	0	0	9	18	468	0	0	0	228	179	0	0	0	0	0	0	0	0	102	378	0	9	454	0	0	0	157	126	0	0	7	58	0
	40	0	0	0	90	0	140	0	0	0	0	0	17	150	0	602	0	0	28	44	0	62	100	0	0	2193	372	438	29	0	42	15	46	123	0	0	54	284	0	19	0	92	0	0	6	70	0	0	0
	41	59	0	0	50	0	280	0	0	0	0	0	0	335	27	165	0	0	0	41	0	33	6	0	32	245	706	50	49	0	0	11	0	191	0	19	230	126	31	18	0	137	0	0	0	149	0	5	0
	42	19	80	43	0	0	12	0	0	0	0	39	107	45	0	0	0	39	155	11	0	16	931	0	0	162	0	1411	28	0	341	78	308	74	0	0	116	0	0	56	0	54	0	0	0	0	0	0	0
	43	0	0	0	0	0	468	0	0	0	0	0	0	225	0	28	0	0	0	111	0	34	9	0	0	0	458	0	34	0	7	10	0	124	0	0	192	301	0	12	0	111	0	0	0	67	0	0	0
	44	191	53	70	0	37	77	0	0	0	11	41	0	285	0	0	0	19	0	188	0	33	0	0	0	0	0	0	133	0	0	0	0	50	27	0	0	0	0	66	0	65	0	0	0	176	0	19	14
	45	0	0	0	0	0	138	0	0	0	0	18	248	124	0	0	0	0	122	0	0	169	506	0	0	6	14	304	25	0	220	178	318	117	39	0	285	62	0	34	0	102	0	0	0	45	0	0	0
	46	0	0	0	0	0	0	0	0	0	0	8	506	30	0	0	0	0	104	0	0	0	568	0	0	0	0	64	0	0	884	15	433	0	0	0	43	0	0	18	0	0	0	0	0	0	0	0	0
	47	0	0	0	116	0	370	0	0	0	0	0	0	212	0	28	0	0	0	54	0	59	0	0	0	67	393	0	15	0	0	0	0	73	0	0	96	362	0	0	0	78	0	0	0	40	0	0	0
	48	932	153	91	0	166	251	0	0	0	0	0	83	100	0	0	0	91	19	0	0	266	150	0	0	0	0	103	15	0	48	53	111	88	0	0	186	104	0	15	0	66	0	0	0	0	0	46	0
	49	1732	0	0	0	0	0	0	0	0	0	14	521	6	0	0	0	17	149	0	9	22	212	0	0	0	0	186	0	0	320	97	157	0	0	0	0	0	0	13	0	0	0	0	0	0	0	95	0
	50	516	236	639	0	747	1021	0	0	0	0	17	0	102	0	0	68	388	0	52	0	0	0	0	0	0	0	0	30	0	0	11	0	5	298	0	0	0	0	19	0	0	0	0	0	34	0	24	168
	51	294	3332	4016	25	588	59	0	0	0	0	17	0	121	0	0	83	317	0	62	0	0	0	0	0	0	26	0	32	0	0	0	0	22	24	0	0	0	0	37	0	22	0	0	0	65	0	13	98
	52	268	0	21	156	0	151	0	0	0	0	53	4	606	0	0	0	0	0	146	0	21	0	0	0	0	83	0	89	0	0	0	0	55	21	0	0	0	0	72	0	163	0	0	0	221	0	20	0
	53	370	0	0	447	0	330	0	0	0	0	63	34	49	0	0	0	0	0	50	0	0	0	0	0	0	20	0	56	0	0	81	0	144	0	0	0	0	0	41	0	20	0	0	72	43	0	29	56
[truncated: 2,514 more columns]

## Sheet: Supplementary table 5
		Supplementary Table 5: Alpha Diversity Indices for Each Sample. This table presents the alpha diversity metrics calculated for each sample, including the Shannon, Simpson, and Chao1 indices. These diversity indices provide insights into the richness and evenness of microbial communities within each sample. The Shannon index measures the overall diversity, including both abundance and evenness of …
		Observed	Chao1	se.chao1	ACE	se.ACE	Shannon	Simpson	InvSimpson	Fisher	depth	season	zone
	1	189	189	0	189	5.56349	4.95634	0.990693	107.441	39.4295	5	flood	Fringe
	2	163	163	0	163	6.08831	3.51307	0.92778	13.8467	26.131	5	dry	Basin
	3	162	162	0	162	5.62018	4.62984	0.981783	54.8931	33.1938	20	dry	Fringe
	4	190	190	0	190	6.06977	4.38245	0.948611	19.4593	36.2706	40	flood	Fringe
	5	154	154	0	154	5.03494	4.42007	0.970455	33.847	29.3156	40	flood	Fringe
	6	242	242	0.249483	242.157	5.75451	5.05971	0.989708	97.1583	46.9884	5	flood	Fringe
	7	363	363	0.166437	363.148	7.91576	5.44279	0.993347	150.303	70.3805	20	flood	Fringe
	8	210	210.5	1.29801	210.301	5.99874	4.76087	0.980357	50.9078	40.9227	20	flood	Basin
	9	330	330	0.0998484	330.149	8.26431	4.8563	0.971212	34.7362	61.9725	40	flood	Basin
	10	264	267	4.65555	264.489	6.95486	4.80349	0.977344	44.139	51.6552	20	flood	Basin
	11	371	371	0.249663	371.14	6.71861	5.53991	0.994393	178.362	71.0533	5	flood	Fringe
	12	151	151	0	151	5.81161	4.06178	0.94367	17.7526	29.1525	40	flood	Basin
	13	133	133	0	133	4.98117	3.18075	0.903762	10.3909	20.9137	5	flood	Basin
	14	56	56	0	56	3.5431	1.96524	0.792708	4.82412	7.56014	20	flood	Basin
	15	136	136	0	136	5.2741	3.53997	0.939262	16.4643	21.6639	40	flood	Basin
	16	347	347	0	347	8.33312	5.24024	0.990201	102.05	67.8492	5	flood	Impaired
	17	273	273	0.0831806	273.188	7.33271	5.04813	0.987993	83.282	53.7772	20	flood	Impaired
	18	393	394.2	1.84102	393.618	8.61465	5.13079	0.985495	68.9436	71.8265	40	flood	Impaired
	19	159	159	0	159	5.9979	3.78828	0.949284	19.7175	27.8876	5	flood	Impaired
	20	244	244	0.166325	244.144	7.50854	4.75596	0.976242	42.0903	48.4575	20	flood	Impaired
	21	238	238	0	238	7.19243	4.59386	0.968965	32.2216	46.1739	40	flood	Impaired
	22	275	275	0	275	7.08237	5.22013	0.991638	119.595	55.6067	20	flood	Fringe
	23	359	359	0	359	7.62601	5.37665	0.991815	122.174	69.1369	5	flood	Impaired
	24	337	338.5	2.5968	337.455	8.26989	5.19259	0.987863	82.3913	67.4855	20	flood	Impaired
	25	358	358.5	1.02725	358.465	8.31623	5.29961	0.990288	102.968	69.6254	40	flood	Impaired
	26	141	141	0.166075	141.148	5.48296	3.26294	0.904861	10.5109	23.5289	20	flood	Fringe
	27	242	242	0.124741	242.161	6.62615	3.74782	0.88211	8.48247	40.768	40	dry	Fringe
	28	162	162	0.0996909	162.152	6.17382	3.09971	0.875157	8.01006	27.4496	20	dry	Fringe
	29	89	89.5	1.29662	89.5239	3.95151	2.60868	0.731845	3.72918	14.6349	40	dry	Fringe
	30	102	102	0	102	4.50708	3.45898	0.944596	18.0491	15.7052	5	dry	Fringe
	31	245	245	0	245	6.65352	4.12131	0.96006	25.0374	39.3472	20	dry	Fringe
	32	166	166	0	166	5.87675	3.62942	0.948302	19.3432	26.4685	40	dry	Fringe
	33	324	324.2	0.621468	324.297	7.70209	5.22292	0.990727	107.843	62.1056	5	flood	Basin
	34	308	309.5	2.23202	308.738	7.5792	4.41183	0.949762	19.9053	54.4606	40	dry	Basin
	35	85	85	0	85	3.91077	3.17994	0.913959	11.6223	12.7177	20	dry	Basin
	36	158	158	0.249208	158.194	4.90757	3.79573	0.955634	22.5397	23.4858	40	dry	Basin
	37	130	130	0.124518	130.192	5.03696	3.6113	0.948744	19.5098	20.123	5	dry	Basin
	38	79	79	0	79	3.39396	3.28426	0.917597	12.1355	11.8817	20	dry	Basin
	39	151	151	0.124585	151.187	4.75199	4.11921	0.968282	31.5275	24.444	40	dry	Basin
	40	283	283	0	283	7.78691	4.4001	0.951925	20.8008	52.3797	5	dry	Impaired
	41	311	311	0	311	7.91596	5.09383	0.98692	76.4533	61.0551	20	dry	Impaired
	42	389	389	0	389	8.729	5.08687	0.983446	60.4078	71.0785	40	dry	Impaired
	43	249	249	0	249	7.1832	4.83282	0.983841	61.8836	49.3524	5	dry	Impaired
	44	327	327	0	327	7.86973	5.38332	0.99309	144.715	66.1217	5	flood	Basin
	45	338	338	0	338	8.09723	5.22182	0.990294	103.034	65.4337	20	dry	Impaired
	46	190	190	0.0997365	190.157	6.52702	4.23658	0.962838	26.9093	35.8156	40	dry	Impaired
	47	156	156	0	156	5.99145	4.29035	0.973093	37.1653	29.9701	5	dry	Impaired
	48	259	259	0.499034	259.141	7.19412	4.88568	0.981117	52.9582	50.1113	20	dry	Impaired
	49	277	277	0	277	7.45625	4.68102	0.967882	31.1353	51.4089	40	dry	Impaired
	50	260	260	0	260	6.67112	4.57257	0.973963	38.4067	47.6472	5	flood	Fringe
	51	238	238	0	238	7.11402	3.25285	0.84503	6.45285	41.0875	5	dry	Fringe
	52	494	494	0	494	8.57923	5.65471	0.993887	163.594	90.8209	5	dry	Basin
	53	218	218	0.249426	218.15	6.31535	4.81709	0.985244	67.7702	42.0671	20	dry	Basin

## Sheet: Supplementary table 6
		Supplementary Table 6: Shapiro-Wilk Test Results for Normality of Diversity Measures. This table contains the results of the Shapiro-Wilk test for each diversity measure used in the study, including indices such as Shannon, Simpson, and Chao1. It provides the p-value for each test, assessing whether the distribution of diversity measures deviates from normality.
		zone	depth	season	Metric	Shapiro_p
	1	Basin	5	dry	Chao1	0.156717
	2	Basin	5	dry	Observed	0.156717
	3	Basin	5	dry	Shannon	0.0775993
	4	Basin	5	dry	Simpson	0.602513
	5	Basin	5	flood	Chao1	0.0240442
	6	Basin	5	flood	Observed	0.0257749
	7	Basin	5	flood	Shannon	0.124826
	8	Basin	5	flood	Simpson	0.0443234
	9	Basin	20	dry	Chao1	0.0729345
	10	Basin	20	dry	Observed	0.0729345
	11	Basin	20	dry	Shannon	0.108741
	12	Basin	20	dry	Simpson	0.086578
	13	Basin	20	flood	Chao1	0.499636
	14	Basin	20	flood	Observed	0.482894
	15	Basin	20	flood	Shannon	0.0250214
	16	Basin	20	flood	Simpson	0.0267648
	17	Basin	40	dry	Chao1	0.0746581
	18	Basin	40	dry	Observed	0.0753869
	19	Basin	40	dry	Shannon	0.944797
	20	Basin	40	dry	Simpson	0.602405
	21	Basin	40	flood	Chao1	0.132814
	22	Basin	40	flood	Observed	0.132814
	23	Basin	40	flood	Shannon	0.77264
	24	Basin	40	flood	Simpson	0.243757
	25	Fringe	5	dry	Chao1
	26	Fringe	5	dry	Observed
	27	Fringe	5	dry	Shannon
	28	Fringe	5	dry	Simpson
	29	Fringe	5	flood	Chao1	0.617352
	30	Fringe	5	flood	Observed	0.617352
	31	Fringe	5	flood	Shannon	0.890971
	32	Fringe	5	flood	Simpson	0.148091
	33	Fringe	20	dry	Chao1	0
	34	Fringe	20	dry	Observed	0
	35	Fringe	20	dry	Shannon	0.634792
	36	Fringe	20	dry	Simpson	0.370471
	37	Fringe	20	flood	Chao1	0.772602
	38	Fringe	20	flood	Observed	0.772602
	39	Fringe	20	flood	Shannon	0.177519
	40	Fringe	20	flood	Simpson	0.0322412
	41	Fringe	40	dry	Chao1	0.996385
	42	Fringe	40	dry	Observed	0.992793
	43	Fringe	40	dry	Shannon	0.180786
	44	Fringe	40	dry	Simpson	0.578694
	45	Fringe	40	flood	Chao1
	46	Fringe	40	flood	Observed
	47	Fringe	40	flood	Shannon
	48	Fringe	40	flood	Simpson
	49	Impaired	5	dry	Chao1	0.499521
	50	Impaired	5	dry	Observed	0.499521
	51	Impaired	5	dry	Shannon	0.367686
	52	Impaired	5	dry	Simpson	0.644146
	53	Impaired	5	flood	Chao1	0.102211
	54	Impaired	5	flood	Observed	0.102211
	55	Impaired	5	flood	Shannon	0.148118
	56	Impaired	5	flood	Simpson	0.0639591
	57	Impaired	20	dry	Chao1	0.654864
	58	Impaired	20	dry	Observed	0.654864
	59	Impaired	20	dry	Shannon	0.738683
	60	Impaired	20	dry	Simpson	0.710442
	61	Impaired	20	flood	Chao1	0.580962
	62	Impaired	20	flood	Observed	0.591373
	63	Impaired	20	flood	Shannon	0.631622
	64	Impaired	20	flood	Simpson	0.0183718
	65	Impaired	40	dry	Chao1	0.861717
	66	Impaired	40	dry	Observed	0.861717
	67	Impaired	40	dry	Shannon	0.949976
	68	Impaired	40	dry	Simpson	0.452616
	69	Impaired	40	flood	Chao1	0.419898
	70	Impaired	40	flood	Observed	0.414387
	71	Impaired	40	flood	Shannon	0.441362
	72	Impaired	40	flood	Simpson	0.412312

## Sheet: Supplementary table 7
		Supplementary Table 7: Kruskal-Wallis Test Results for Diversity Metrics Across Different Groups This table details the results of the Kruskal-Wallis test for each diversity measure, including Shannon, Simpson, and Chao1 indices, across various grouping variables such as zone, depth, and season. It provides the p-values obtained from these tests, which assess the statistical differences in microb…
		Metric	Kruskal_p_zone	Kruskal_p_depth	Kruskal_p_season
	1	Chao1	0.00769151	0.825222	0.1495
	2	Observed	0.00769151	0.825222	0.15459
	3	Shannon	0.0282146	0.515546	0.0121185
	4	Simpson	0.0731375	0.148369	0.017965

## Sheet: Supplementary table 8
		Supplementary Table 8: Pairwise Wilcoxon Test Results for Diversity Metrics Across Combinations of Factors. This table presents the results from pairwise Wilcoxon rank-sum tests, examining differences in microbial diversity measures across various combinations of environmental factors such as zone, depth, and season. Each entry lists the p-values for comparisons between each pair of factor combin…
		Factor	Comparison	Observed	Chao1	Shannon	Simpson
	1	Depth	20 vs. 5	1.000	1.000	1.000	1.000
	2	Depth	40 vs. 5	1.000	1.000	1.000	0.268
	3	Depth	40 vs. 20	1.000	1.000	0.991	0.375
	4	Season	flood vs. dry	0.157	0.152	0.012*	0.018*
	5	Zone	Fringe vs. Basin	1.000	1.000	1.000	1.000
	6	Zone	Impaired vs. Basin	0.023*	0.023*	0.055	0.065
	7	Zone	Impaired vs. Fringe	0.029*	0.029*	0.085	0.351

## Sheet: Supplementary table 9
		Supplementary Table 9: PERMANOVA Results for Assessing Differences in Microbial Community Composition. This table summarizes the results from PERMANOVA (Permutational Multivariate Analysis of Variance) tests conducted to evaluate differences in microbial community composition across various comparisons, including factors such as zone, depth, and season. The table provides F-statistics and corresp…
		Interaction	F_statistic	R2	p_value
	1	permanova_zone_main_effect	5.8236	0.188933	0.0001
	2	permanova_season_main_effect	2.74213	0.0510239	0.0005
	3	permanova_depth_main_effect	3.31795	0.117168	0.0001
	4	permanova_depth_group_main_effect	4.09736	0.0743659	0.0001
	5	permanova_zone_season_main_effect_combined	5.15064	0.239743	0.0001
	6	permanova_zone_depth_main_effect_combined	5.28788	0.305872	0.0001
	7	permanova_season_depth_main_effect_combined	3.33029	0.169363	0.0001
	8	permanova_zone_season_depth_main_effect_combined	5.23881	0.357871	0.0001
	9	permanova_zone_season_depth_group_main_effect_combined	5.5222	0.315154	0.0001
	10	permanova_zone_season_interaction	3.95767	0.296284	0.0001
	11	permanova_zone_depth_interaction	3.72334	0.403686	0.0001
	12	permanova_season_depth_interaction	2.29323	0.196116	0.0001
	13	permanova_zone_depth_group_interaction	4.41974	0.319814	0.0001
	14	permanova_season_depth_group_interaction	2.74385	0.143829	0.0001
	15	permanova_zone_season_depth_interaction	2.77001	0.573639	0.0001
	16	permanova_zone_season_depth_group_interaction	3.23862	0.464925	0.0001
	17	permanova_season_depth_additive	3.33029	0.169363	0.0001
